# Supplementary material for: Ligand-free Guerbet-type reactions in air catalyzed by in situ formed complexes of base metal salt cobaltous chloride
Source: Royal Society of Chemistry journal article supplement (doi:10.1039/d1cy02159a), 2022-01-01
Supplement: d1cy02159a1.pdf [file d1cy02159a1.pdf]

## Supporting Information

### **Ligand-free Guerbet-Type Reactions in Air Catalyzed by *In-Situ* Formed Complexes of Base Metal Salt Cobaltous Chloride**

Pran Gobinda Nandi,<sup>a</sup> Pradhuman Kumar<sup>a</sup> and Akshai Kumar<sup>\*a,b,c</sup>

<sup>a</sup>Department of Chemistry, Indian Institute of Technology Guwahati, Guwahati – 781039, Assam, India

<sup>b</sup>Center for Nanotechnology, Indian Institute of Technology Guwahati, Guwahati – 781039, Assam, India

<sup>c</sup>School of Health Sciences, Indian Institute of Technology Guwahati, Guwahati – 781039, Assam, India.

Email: [akshaikumar@iitg.ac.in](mailto:akshaikumar@iitg.ac.in)

| <b>Table of Contents</b> |                                                      | <b>Page</b> |
|--------------------------|------------------------------------------------------|-------------|
| <b>1.</b>                | <b>Experimental Section</b>                          | S2          |
| <b>2.</b>                | <b>Optimization table and Substrate Scope</b>        | S4          |
| <b>3.</b>                | <b>NMR Spectra</b>                                   | S9          |
| <b>4.</b>                | <b>HRMS Analysis</b>                                 | S29         |
| <b>5.</b>                | <b>EPR Analysis</b>                                  | S40         |
| <b>6.</b>                | <b>Gas Chromatography Analysis</b>                   | S43         |
| <b>7.</b>                | <b>Kinetic Studies</b>                               | S44         |
| <b>8.</b>                | <b>FESEM Analysis</b>                                | S59         |
| <b>9.</b>                | <b>TEM Analysis</b>                                  | S60         |
| <b>10.</b>               | <b>Evidence for the formation of Black particles</b> | S60         |
| <b>11.</b>               | <b>References</b>                                    | S61         |

## 1. Experimental Section

**General Procedure and Materials.** All manipulations were carried out in air. The Co metal salts, NaO<sup>t</sup>Bu, KO<sup>t</sup>Bu, NaOH, KOH, Na<sub>2</sub>CO<sub>3</sub>, K<sub>2</sub>CO<sub>3</sub>, CDCl<sub>3</sub>, benzyl alcohol, 1-phenyl ethanol and their derivatives were purchased either from MERCK or Sigma–Aldrich and used as such. To prepare the stock solution, CoCl<sub>2</sub> was dissolved either in benzyl alcohol or 1-phenyl ethanol. All catalytic reactions were carried out in air using oven-dried glassware. The 1-phenyl ethanol derivatives which were commercially not available were prepared according to literature procedure.<sup>[1a]</sup>

**Physical Measurements.** <sup>1</sup>H, <sup>13</sup>C {<sup>1</sup>H} and <sup>19</sup>F NMR were recorded on a Bruker ASCEND 600 operating at 600 MHz for <sup>1</sup>H, 150 MHz for <sup>13</sup>C {<sup>1</sup>H} or on a Bruker AVANCE 400 operating at 400 MHz for <sup>1</sup>H, 100 MHz for <sup>13</sup>C {<sup>1</sup>H} or on a Bruker AVANCE 500 operating at 500 MHz for <sup>1</sup>H, 125 MHz for <sup>13</sup>C {<sup>1</sup>H}. Chemical shifts (δ) are reported in ppm. HRMS measurements were done using an Agilent Accurate-Mass Q-TOF ESI–MS 6520. The X-band EPR spectra were recorded on a JES-FA200 ESR spectrometer. The field-emission scanning electron microscopy (FESEM) were performed using JSM-7610F instrument. Transmission electron microscopy (TEM) analysis were carried out using a JEOL JEM-2100F FETEM instrument.

**General procedure for CoCl<sub>2</sub> catalyzed β-alkylation of alcohols.** In a 10 mL pear-shaped flask, 1-phenyl ethanol or benzyl alcohol were taken in air. This was followed by addition of 2.5 mol % of NaO<sup>t</sup>Bu and 0.01 mol % of CoCl<sub>2</sub> (from a stock solution either in 1-phenyl ethanol or benzyl alcohol). After the addition, the reaction mixture contained 0.61 mL (5.00 mmol) of 1-phenyl ethanol, 0.52 mL (5.00 mmol) of benzyl alcohol, 24 mg (0.25 mmol) of NaO<sup>t</sup>Bu and 0.13 mg (1 μmol) of CoCl<sub>2</sub>. The mixture was heated at 140 °C for 24 h in air. The reaction mixture was then cooled to room temperature. An aliquot (Typically 10 mg) was withdrawn from reaction mixture and the NMR yield was determined by <sup>1</sup>H NMR using CDCl<sub>3</sub> as solvent and toluene (Typically 10 μL) as an internal standard. The yield was determined by <sup>1</sup>H NMR spectroscopy.<sup>[1b]</sup>

**Preparation of FESEM sample.** An aliquot (approximately 10 mg) was withdrawn from reaction mixture and dropcasted on a glass slide. The dropcasted sample was submitted for FESEM analysis. A JSM-7610F instrument was used for the field-emission scanning electron microscopy (FESEM) analysis.

**Preparation of TEM sample.** An aliquot (approximately 10 mg) was withdrawn from reaction mixture and dropcasted on a TEM grid. The dropcasted sample was submitted for TEM analysis. Transmission electron microscopy (TEM) analysis were carried out using a JEOL JEM-2100F FETEM instrument.

**General procedure for CoCl<sub>2</sub> catalyzed β-alkylation of alcohols-kinetic study.** In a 10 mL pear-shaped flask, 1-phenyl ethanol or benzyl alcohol were taken in air. This was followed by addition of 2.5 mol % of NaO<sup>t</sup>Bu and 0.01 mol % of CoCl<sub>2</sub> (from a stock solution either in 1-phenyl ethanol or benzyl alcohol). After the addition, the reaction mixture contained 0.61 mL (5.00 mmol) of 1-phenyl ethanol, 0.52 mL (5.00 mmol) of benzyl alcohol, 24 mg (0.25 mmol) of NaO<sup>t</sup>Bu and 0.13 mg (1 μmol) of CoCl<sub>2</sub>. The mixture was heated at 140 °C and aliquots were withdrawn at periodic intervals of 0.5h, 1h, 2h, 3h, 5h, 6h, 9h, 12h, 15h, 18h, 21h and 24 h. Yield of the desired product was determined by <sup>1</sup>H NMR using CDCl<sub>3</sub> as solvent and toluene as standard.

**Procedure for CoCl<sub>2</sub> catalyzed  $\beta$ -alkylation of alcohols with hot filtration.** In a 10 mL pear-shaped flask, 1-phenyl ethanol or benzyl alcohol were taken in air. This was followed by addition of 5 mol % of NaO<sup>t</sup>Bu and 0.02 mol % of CoCl<sub>2</sub> (from a stock solution either in 1-phenyl ethanol or benzyl alcohol). After the addition, the reaction mixture contained 0.61 mL (5.00 mmol) of 1-phenyl ethanol, 0.52 mL (5.00 mmol) of benzyl alcohol, 24 mg (0.25 mmol) of NaO<sup>t</sup>Bu and 0.13 mg (1  $\mu$ mol) of CoCl<sub>2</sub>. The mixture was heated at 140 °C and an aliquot was withdrawn after 1h and the yield of the desired product was determined by <sup>1</sup>H NMR using CDCl<sub>3</sub> as solvent and toluene as standard. The hot reaction mixture was subsequently filtered using 0.2  $\mu$ m Nylon Membrane Filter. The filtrate was then heated at 140 °C and aliquots were withdrawn at periodic intervals of 0.5h, 1h, 2h, 3h, 5h, 6h, 9h, 12h, 15h, 18h, 21h and 24 h. Yield of the desired product was determined by <sup>1</sup>H NMR using CDCl<sub>3</sub> as solvent and toluene as standard.

**Procedure for CoCl<sub>2</sub> catalyzed  $\beta$ -alkylation of alcohols with 3h interval after 3h of reaction.** In a 10 mL pear-shaped flask, 1-phenyl ethanol or benzyl alcohol were taken in air. This was followed by addition of 5 mol % of NaO<sup>t</sup>Bu and 0.02 mol % of CoCl<sub>2</sub> (from a stock solution either in 1-phenyl ethanol or benzyl alcohol). After the addition, the reaction mixture contained 0.61 mL (5.00 mmol) of 1-phenyl ethanol, 0.52 mL (5.00 mmol) of benzyl alcohol, 24 mg (0.25 mmol) of NaO<sup>t</sup>Bu and 0.13 mg (1  $\mu$ mol) of CoCl<sub>2</sub>. The mixture was heated at 140 °C and aliquots were withdrawn after 1h, 2h and 3h. The reaction mixture was then allowed to stand for 3h. After this 3h break, heating was then resumed and aliquots were withdrawn at periodic intervals of 5h, 6h, 9h, 12h, 15h, 18h, 21h and 24 h of reaction at 140 °C. Yield of the desired product was determined by <sup>1</sup>H NMR using CDCl<sub>3</sub> as solvent and toluene as standard.

## 2. Optimization table and Substrate Scope

**Table S1. Solvent-Free  $\beta$ -alkylation of Benzyl Alcohol with 1-Phenyl Ethanol under Varying Conditions<sup>a</sup>**

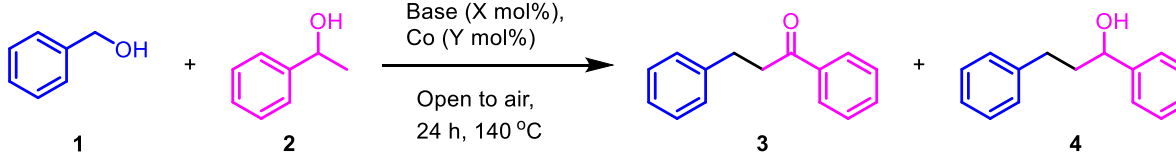

| Entry          | Catalyst<br>(Y mol %) <sup>b</sup>          | Base<br>(X mol%) <sup>b</sup>         | Yield <sup>c</sup><br>of Products, % |                     | Selectivity of <b>4</b> ((Yield<br>of <b>4</b> / Total yield ( <b>3</b> + <b>4</b> ))<br>*100) |
|----------------|---------------------------------------------|---------------------------------------|--------------------------------------|---------------------|------------------------------------------------------------------------------------------------|
|                |                                             |                                       | <b>3</b>                             | <b>4</b>            |                                                                                                |
| 1              | CoCl <sub>2</sub> (1.0)                     | NaO <sup>t</sup> Bu (2.5)             | 4(4) <sup>e</sup>                    | 25(8) <sup>e</sup>  | 86                                                                                             |
| 2 <sup>d</sup> | CoCl <sub>2</sub> (1.0)                     | NaO <sup>t</sup> Bu (2.5)             | 7                                    | 44                  | 86                                                                                             |
| 3              | CoCl <sub>2</sub> (0.5)                     | NaO <sup>t</sup> Bu (2.5)             | 4                                    | 49                  | 92                                                                                             |
| 4              | CoCl <sub>2</sub> (0.1)                     | NaO <sup>t</sup> Bu (2.5)             | 4                                    | 74                  | 95                                                                                             |
| 5              | CoCl <sub>2</sub> (0.05)                    | NaO <sup>t</sup> Bu (2.5)             | 4                                    | 81                  | 95                                                                                             |
| 6              | CoCl <sub>2</sub> (0.01)                    | NaO <sup>t</sup> Bu (2.5)             | 9(9) <sup>e</sup>                    | 87(88) <sup>e</sup> | 91                                                                                             |
| 7 <sup>d</sup> | CoCl <sub>2</sub> (0.01)                    | NaO <sup>t</sup> Bu (2.5)             | 2                                    | 88                  | 98                                                                                             |
| 8              | CoCl <sub>2</sub> (0.005)                   | NaO <sup>t</sup> Bu (2.5)             | 4                                    | 78                  | 95                                                                                             |
| 9              | CoCl <sub>2</sub> (0.01)                    | NaO <sup>t</sup> Bu (1.25)            | 4                                    | 58                  | 94                                                                                             |
| 10             | CoCl <sub>2</sub> ·6H <sub>2</sub> O (0.01) | NaO <sup>t</sup> Bu (2.5)             | 3                                    | 63                  | 95                                                                                             |
| 11             | CoCl <sub>2</sub> (0.01)                    | KO <sup>t</sup> Bu (2.5)              | 4                                    | 41                  | 91                                                                                             |
| 12             | CoCl <sub>2</sub> (0.01)                    | Na <sub>2</sub> CO <sub>3</sub> (2.5) | 0                                    | 0                   | 0                                                                                              |
| 13             | CoCl <sub>2</sub> (0.01)                    | K <sub>2</sub> CO <sub>3</sub> (2.5)  | 0                                    | 0                   | 0                                                                                              |
| 14             | CoCl <sub>2</sub> (0.01)                    | KOH (2.5)                             | 3                                    | 40                  | 93                                                                                             |
| 15             | CoCl <sub>2</sub> (0.01)                    | NaOH (2.5)                            | 6                                    | 82                  | 93                                                                                             |
| 16             | Co(OAc) <sub>2</sub> (0.01)                 | NaO <sup>t</sup> Bu (2.5)             | 4                                    | 84                  | 95                                                                                             |
| 17             | Co(acac) <sub>2</sub> (0.01)                | NaO <sup>t</sup> Bu (2.5)             | 4                                    | 68                  | 94                                                                                             |
| 18             | -                                           | NaO <sup>t</sup> Bu (2.5)             | 2                                    | 8                   | 80                                                                                             |
| 19             | CoCl <sub>2</sub> (0.01)                    | NaO <sup>t</sup> Bu (1)               | 6                                    | 19                  | 76                                                                                             |
| 20             | CoCl <sub>2</sub> (0.01)                    | NaO <sup>t</sup> Bu (5)               | 10                                   | 88                  | 90                                                                                             |
| 21             | CoCl <sub>2</sub> (0.01)                    | NaO <sup>t</sup> Bu (10)              | 8                                    | 86                  | 91                                                                                             |

<sup>a</sup>Reaction conditions: 5 mmol of **1**, 5 mmol of **2**, X mol% of base and Y mol% of Co catalyst at 140 °C. <sup>b</sup>mol % of base and catalyst is with respect to total alcohol content (**1**+**2**). <sup>c</sup>Yield is determined from <sup>1</sup>H NMR using toluene as external standard. <sup>d</sup>Performed under argon atmosphere. <sup>e</sup>Performed in the presence of excess Hg.



**Table S2. The CoCl<sub>2</sub> Catalyzed Solvent-Free  $\beta$ -alkylation of Various Primary and Secondary Alcohols<sup>a</sup>**

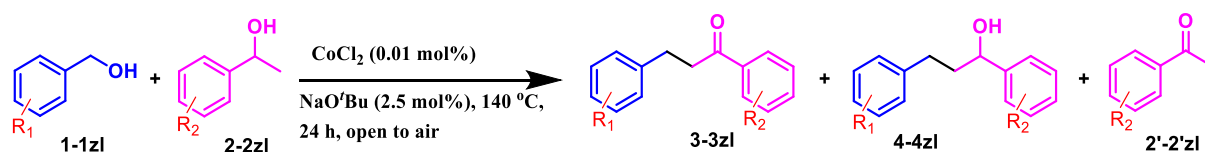

| Entry | Product | 4-4zl Yield (%) | 3-3zl Yield (%) | 2'-2'zl Yield (%) | Total yield <sup>b</sup> [TON] | 4-4zl Selectivity <sup>c</sup> |
|-------|---------|-----------------|-----------------|-------------------|--------------------------------|--------------------------------|
| 1     |         | 87              | 9               | trace             | 96 [9600]                      | 91                             |
| 2     |         | 56              | 4               | 2                 | 62 [6200]                      | 93                             |
| 3     |         | 84              | 4               | 0                 | 88 [8800]                      | 95                             |
| 4     |         | 82              | 16              | 0                 | 98 [9800]                      | 84                             |
| 5     |         | 43              | 1               | 1                 | 45 [4500]                      | 98                             |
|       |         | 34 <sup>d</sup> | 2               | trace             | 36 [3600]                      | 94                             |
| 6     |         | 14              | 4               | 0                 | 18 [1800]                      | 78                             |
| 7     |         | 2               | 2               | 1                 | 5 [500]                        | 50                             |
|       |         | 19 <sup>e</sup> | 2               | 2                 | 23 [230]                       | 90                             |
|       |         | 3 <sup>d</sup>  | 1               | 1                 | 5 [500]                        | 75                             |
| 8     |         | 55              | 4               | 1                 | 60 [6000]                      | 93                             |

|    |                                                                                     |                 |       |       |           |     |
|----|-------------------------------------------------------------------------------------|-----------------|-------|-------|-----------|-----|
| 9  | 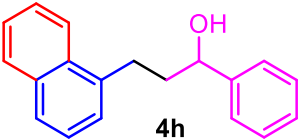   | 41              | 4     | 2     | 47 [4700] | 91  |
|    |                                                                                     | 63 <sup>d</sup> | 16    | 2     | 81 [8100] | 80  |
| 10 |    | 71              | 3     | 2     | 76 [7600] | 96  |
| 11 |    | 81              | 8     | trace | 89 [8900] | 91  |
| 12 |    | 56              | 7     | 0     | 63 [6300] | 89  |
| 13 |    | 10              | 5     | trace | 15 [1500] | 67  |
| 14 |   | 80              | 3     | trace | 83 [8300] | 96  |
|    |                                                                                     | 80 <sup>f</sup> | 4     | 1     | 85 [8500] | 95  |
| 15 |  | 6               | nd    | 4     | 10 [1000] | 100 |
| 16 |  | 5               | trace | 2     | 7 [700]   | 100 |
|    |                                                                                     | 18 <sup>d</sup> | trace | 3     | 21 [2100] | 100 |
| 17 |  | 4               | trace | 3     | 7 [700]   | 100 |
|    |                                                                                     | 3 <sup>e</sup>  | 0     | 1     | 4 [40]    | 100 |
|    |                                                                                     | 7 <sup>d</sup>  | 0     | 5     | 12 [1200] | 100 |
| 18 |  | 84              | 12    | trace | 96 [9600] | 88  |
| 19 |  | 4               | 2     | 1     | 7 [700]   | 67  |
|    |                                                                                     | 8 <sup>e</sup>  | 4     | 1     | 13 [130]  | 67  |
|    |                                                                                     | 5 <sup>d</sup>  | 2     | 1     | 8 [800]   | 71  |
| 20 |  | 7               | 2     | 0     | 9 [900]   | 78  |
|    |                                                                                     | 12 <sup>d</sup> | 2     | 0     | 14 [1400] | 86  |

|    |                                                                                            |                      |       |       |           |     |
|----|--------------------------------------------------------------------------------------------|----------------------|-------|-------|-----------|-----|
| 21 | 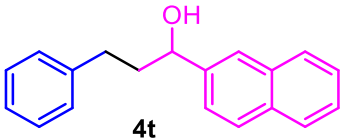<br>4t    | 84                   | 7     | trace | 91 [9100] | 92  |
| 22 | <br>4u    | 3 (two diastereomer) | trace | 5     | 8 [800]   | 100 |
| 23 | <br>4v    | 36                   | 2     | 3     | 41 [4100] | 95  |
|    |                                                                                            | 81 <sup>d</sup>      | 14    | 1     | 96 [9600] | 85  |
| 24 | <br>4w    | 74                   | 3     | trace | 77 [7700] | 96  |
| 25 | <br>4x    | 83                   | 5     | trace | 88 [8800] | 94  |
| 26 | <br>4y  | 0                    | 2     | 0     | 2 [200]   | 0   |
| 27 | <br>4z  | 89                   | 9     | trace | 98 [9800] | 91  |
| 28 | <br>4za | 0                    | 0     | 22    | 22 [2200] | 0   |
| 29 | <br>4zb | 21                   | 2     | 3     | 26 [2600] | 91  |
| 30 | <br>4zc | 88                   | 8     | trace | 96 [9600] | 92  |
| 31 | <br>4zd | 81                   | 4     | 1     | 86 [8600] | 95  |

|    |                                                                                            |                 |       |       |           |     |
|----|--------------------------------------------------------------------------------------------|-----------------|-------|-------|-----------|-----|
| 32 | 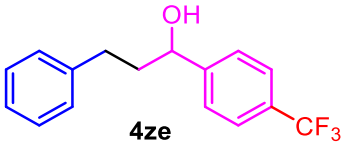<br>4ze   | 81              | 5     | trace | 86 [8600] | 94  |
| 33 | <br>4zf   | 53              | 4     | 1     | 58 [5800] | 93  |
| 34 | <br>4zg   | 0               | 0     | 1     | 1 [100]   | 0   |
| 35 | <br>4zh   | 66              | 3     | 1     | 70 [7000] | 96  |
| 36 | <br>4zi  | 5               | trace | 3     | 8 [800]   | 100 |
| 37 | <br>4zj | 34              | 4     | 3     | 41 [4100] | 89  |
|    |                                                                                            | 86 <sup>d</sup> | 5     | 1     | 92 [9200] | 95  |
| 38 | <br>4zk | 80              | 16    | 1     | 97 [9700] | 83  |
| 39 | <br>4zl | 4               | 1     | 0     | 5 [500]   | 80  |
|    |                                                                                            | 3 <sup>d</sup>  | 1     | 1     | 5 [500]   | 75  |

<sup>a</sup>Reaction conditions: 5 mmol of **1**, 5 mmol of **2**, 2.5 mol% of base and 0.01 mol% of CoCl<sub>2</sub> (mol % of base and catalyst is with respect to total alcohol content (**1**+**2**)) at 140 °C, yield is determined from <sup>1</sup>H NMR using toluene as external standard. <sup>b</sup>Total yield are calculated as yield of (**3**+**4**+**2'**). <sup>c</sup>Selectivity = yield of **4**/yield of (**3**+**4**). <sup>d</sup>Performed under argon atmosphere. <sup>e</sup>Reaction performed with 0.1 mol% CoCl<sub>2</sub> (with respect to both the substrates). <sup>f</sup>Reaction was repeated under same conditions.

### 3. NMR Spectra

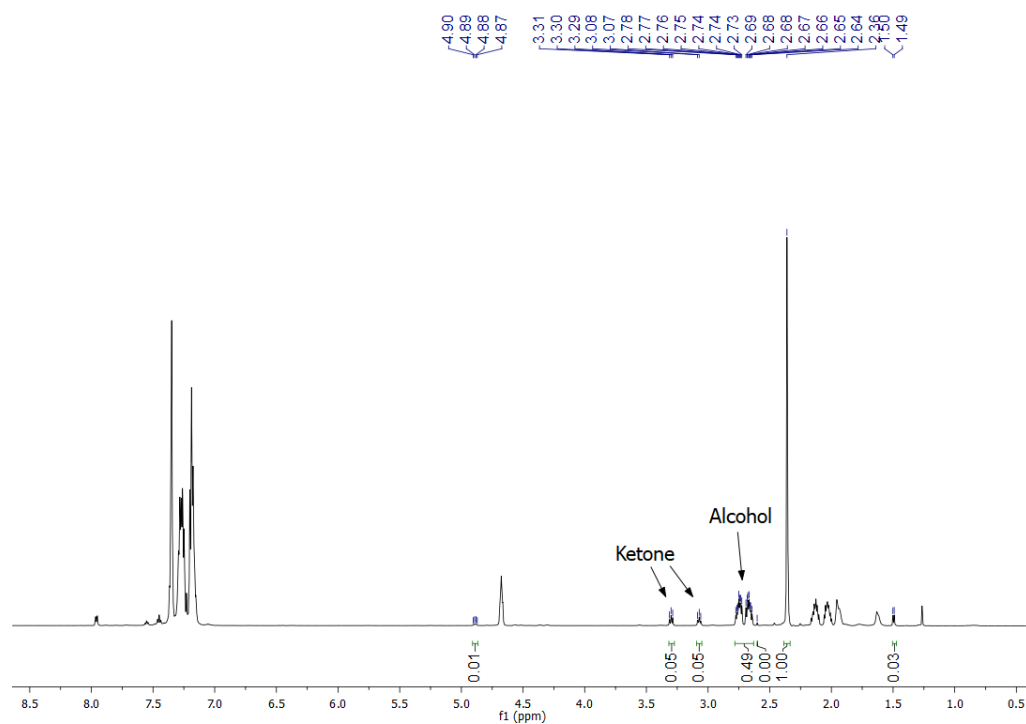

**Figure S1:**  $^1\text{H}$  NMR spectra of  $\beta$ -alkylation of **1** with **2** catalyzed by  $\text{CoCl}_2$  (0.01 mol %) at 140  $^\circ\text{C}$  (Table S2, entry 1)<sup>[2-4]</sup>

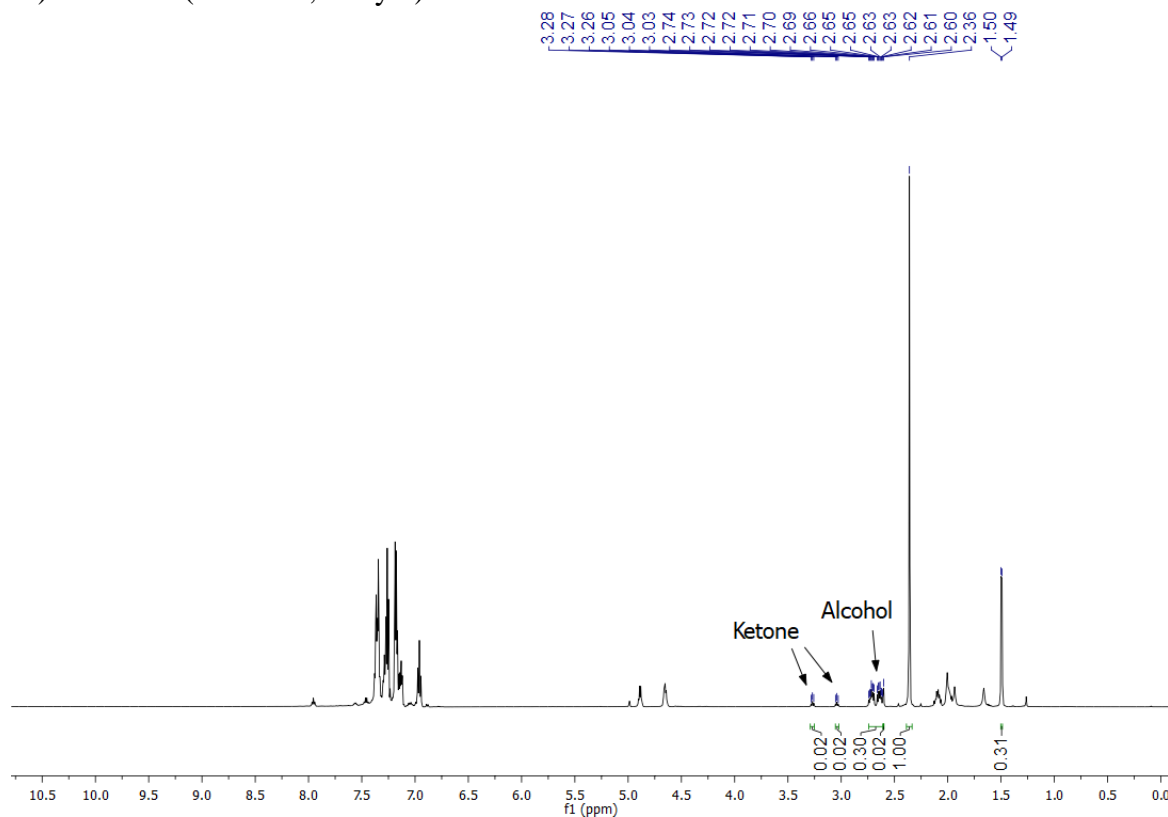

**Figure S2:**  $^1\text{H}$  NMR spectra of  $\beta$ -alkylation of **1a** with **2a** catalyzed by  $\text{CoCl}_2$  (0.01 mol %) at 140  $^\circ\text{C}$  (Table S2, entry 2)<sup>[4]</sup>

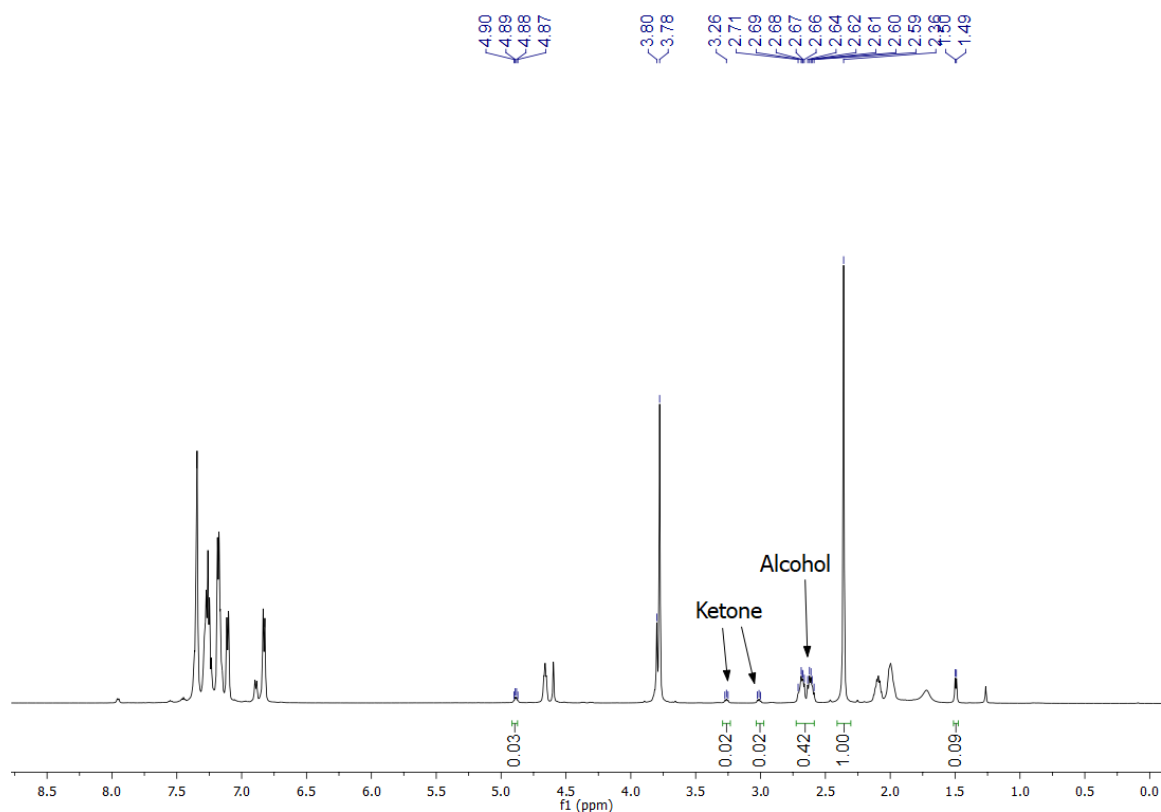

**Figure S3:**  $^1\text{H}$  NMR spectra of  $\beta$ -alkylation of **1b** with **2b** catalyzed by  $\text{CoCl}_2$  (0.01 mol %) at 140  $^\circ\text{C}$  (Table S2, entry 3)<sup>[2, 4-5]</sup>

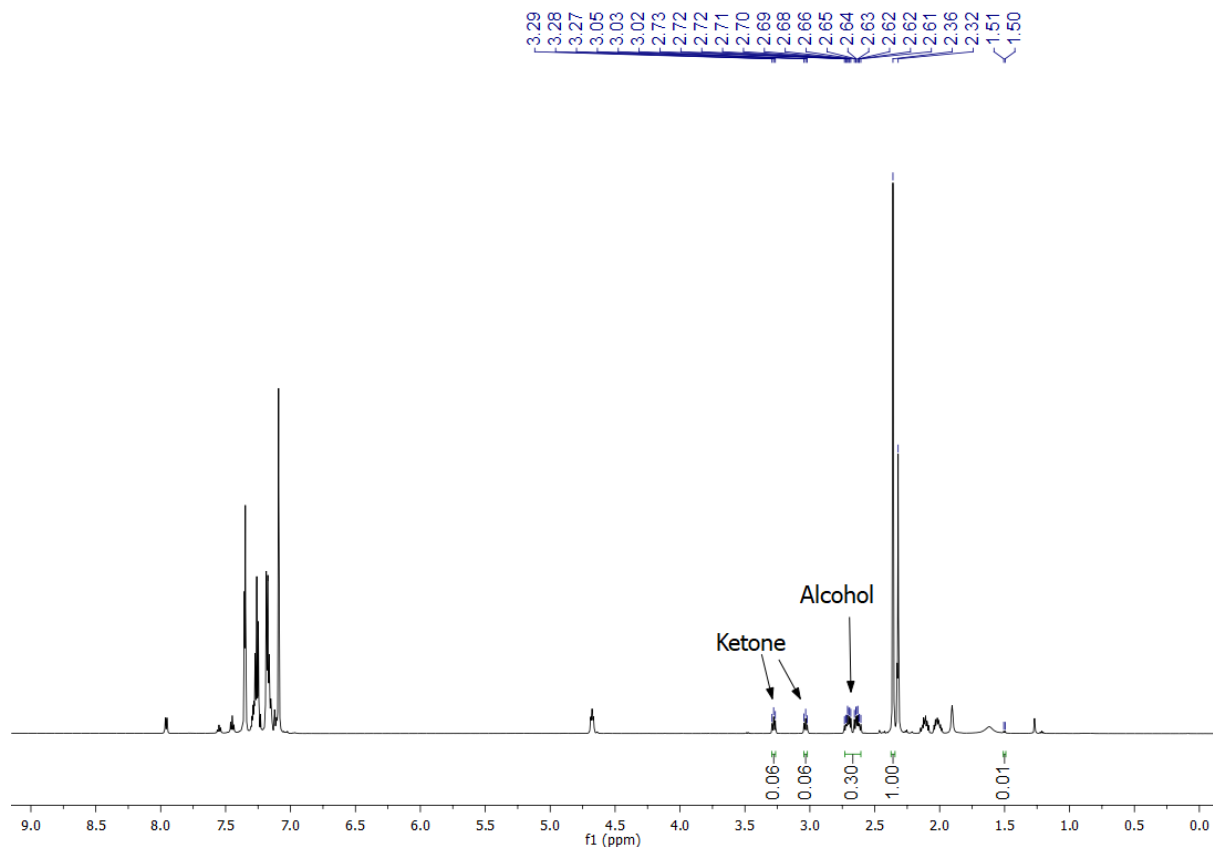

**Figure S4:**  $^1\text{H}$  NMR spectra of  $\beta$ -alkylation of **1c** with **2c** catalyzed by  $\text{CoCl}_2$  (0.01 mol %) at 140  $^\circ\text{C}$  (Table S2, entry 4)<sup>[2-4]</sup>

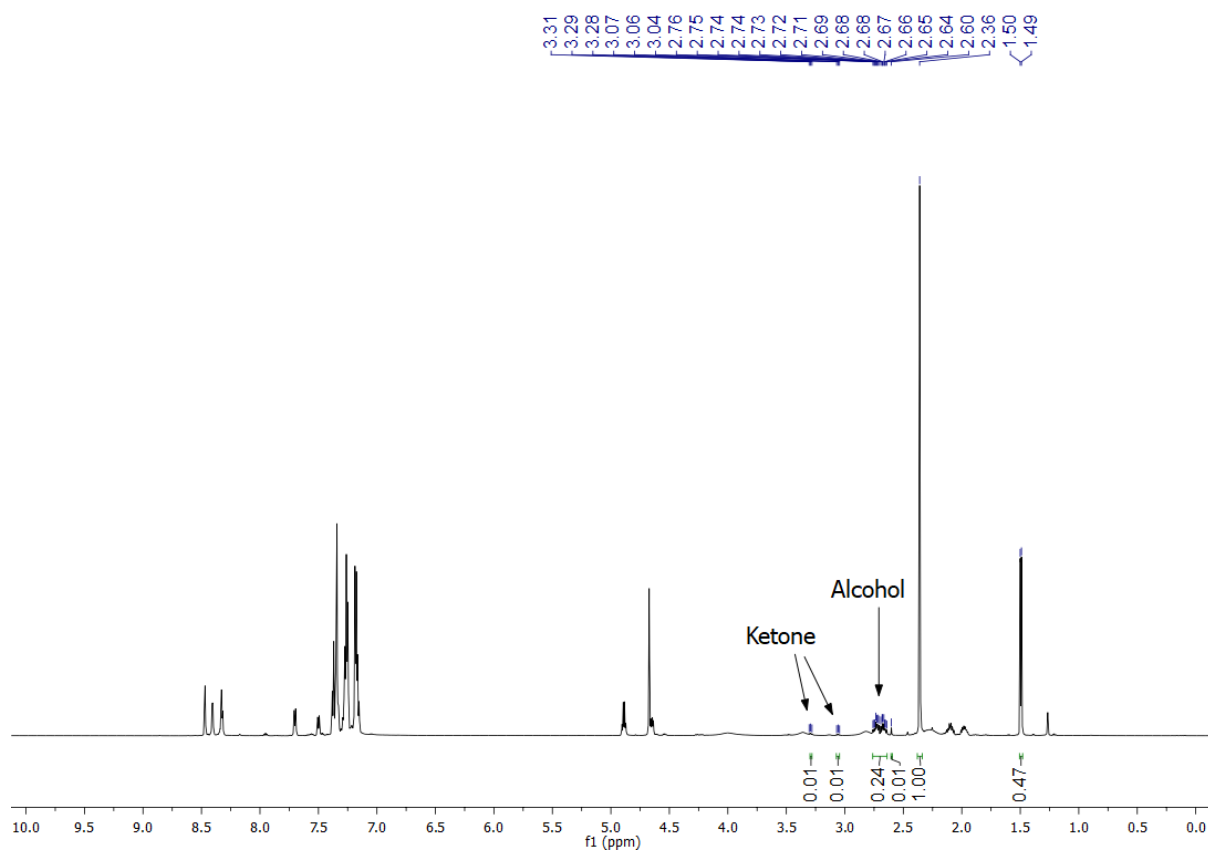

**Figure S5:**  $^1\text{H}$  NMR spectra of  $\beta$ -alkylation of **1d** with **2d** catalyzed by  $\text{CoCl}_2$  (0.01 mol %) at 140  $^\circ\text{C}$  (Table S2, entry 5)<sup>[13]</sup>

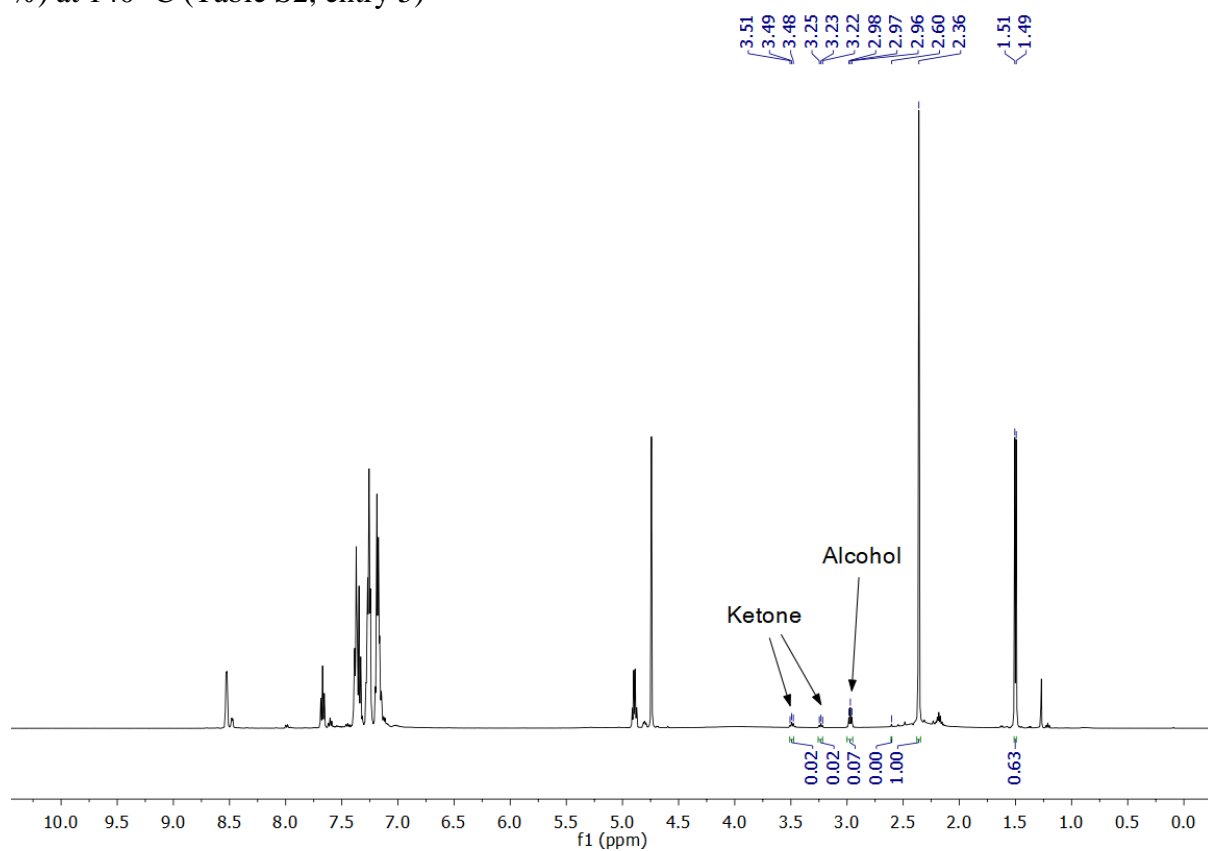

**Figure S6:**  $^1\text{H}$  NMR spectra of  $\beta$ -alkylation of **1e** with **2e** catalyzed by  $\text{CoCl}_2$  (0.01 mol %) at 140  $^\circ\text{C}$  (Table S2, entry 6)<sup>[6]</sup>

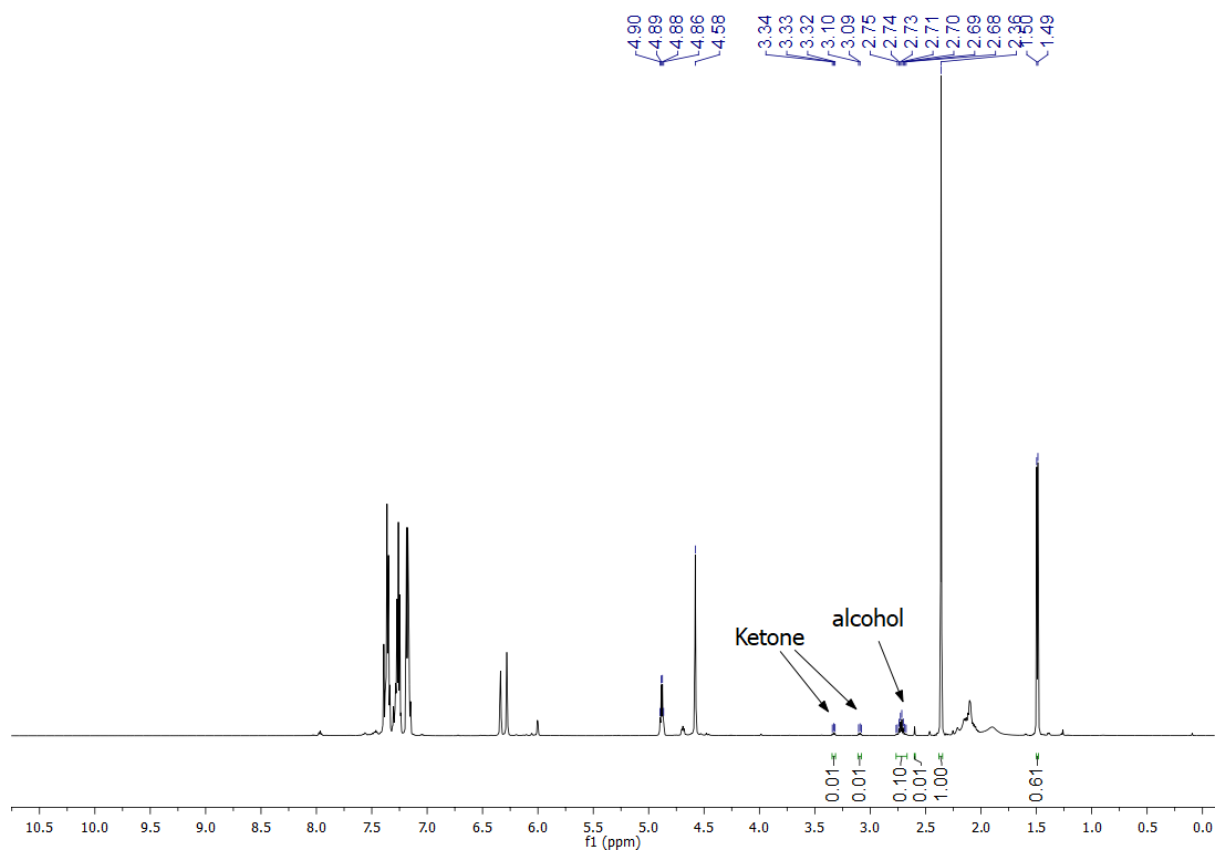

**Figure S7:**  $^1\text{H}$  NMR spectra of  $\beta$ -alkylation of **1f** with **2f** catalyzed by  $\text{CoCl}_2$  (0.1 mol %) at 140  $^\circ\text{C}$  (Table S2, entry 7)<sup>[2, 7, 8]</sup>

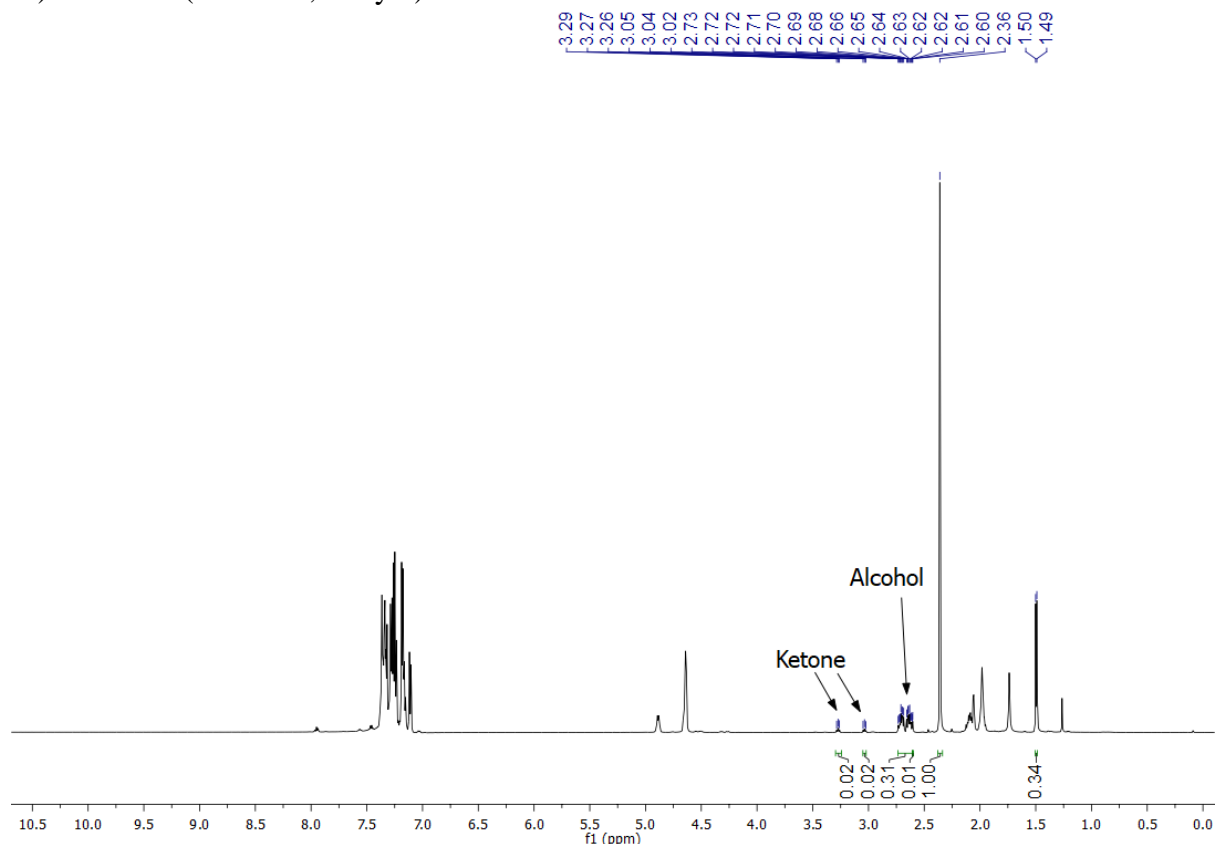

**Figure S8:**  $^1\text{H}$  NMR spectra of  $\beta$ -alkylation of **1g** with **2g** catalyzed by  $\text{CoCl}_2$  (0.01 mol %) at 140  $^\circ\text{C}$  (Table S2, entry 8)<sup>[2, 4, 5]</sup>



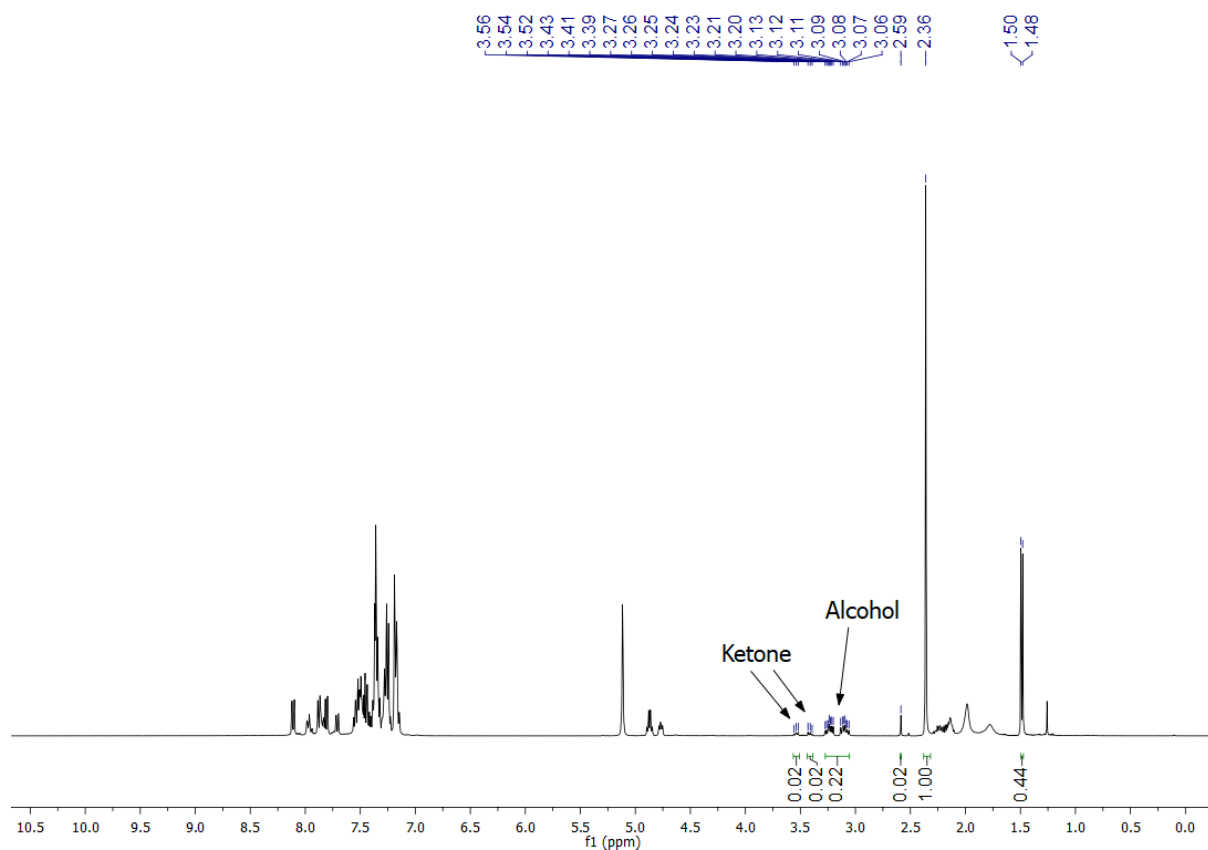

**Figure S9:**  $^1\text{H}$  NMR spectra of  $\beta$ -alkylation of **1h** with **2h** catalyzed by  $\text{CoCl}_2$  (0.01 mol %) at 140 °C (Table S2, entry 9)<sup>[4, 6]</sup>

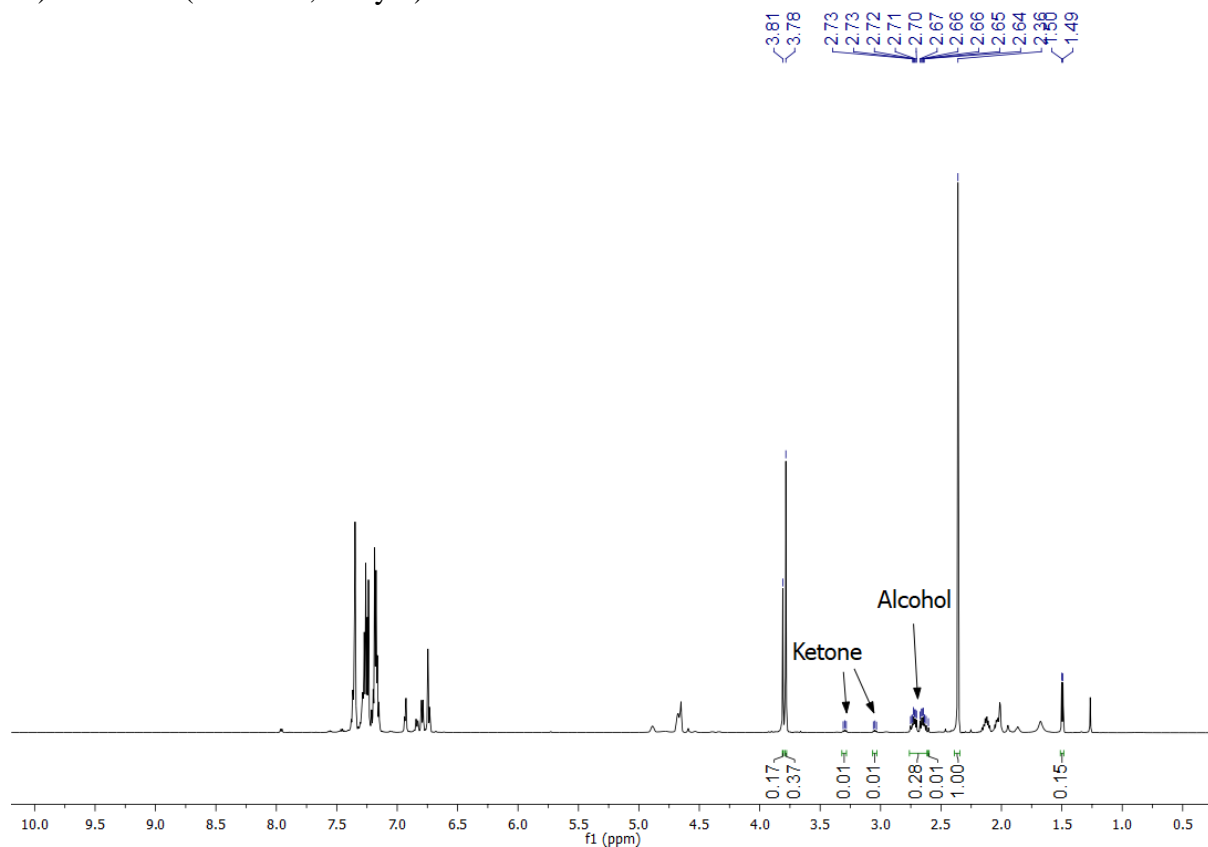

**Figure S10:**  $^1\text{H}$  NMR spectra of  $\beta$ -alkylation of **1i** with **2i** catalyzed by  $\text{CoCl}_2$  (0.01 mol %) at 140 °C (Table S2, entry 10)<sup>[6]</sup>

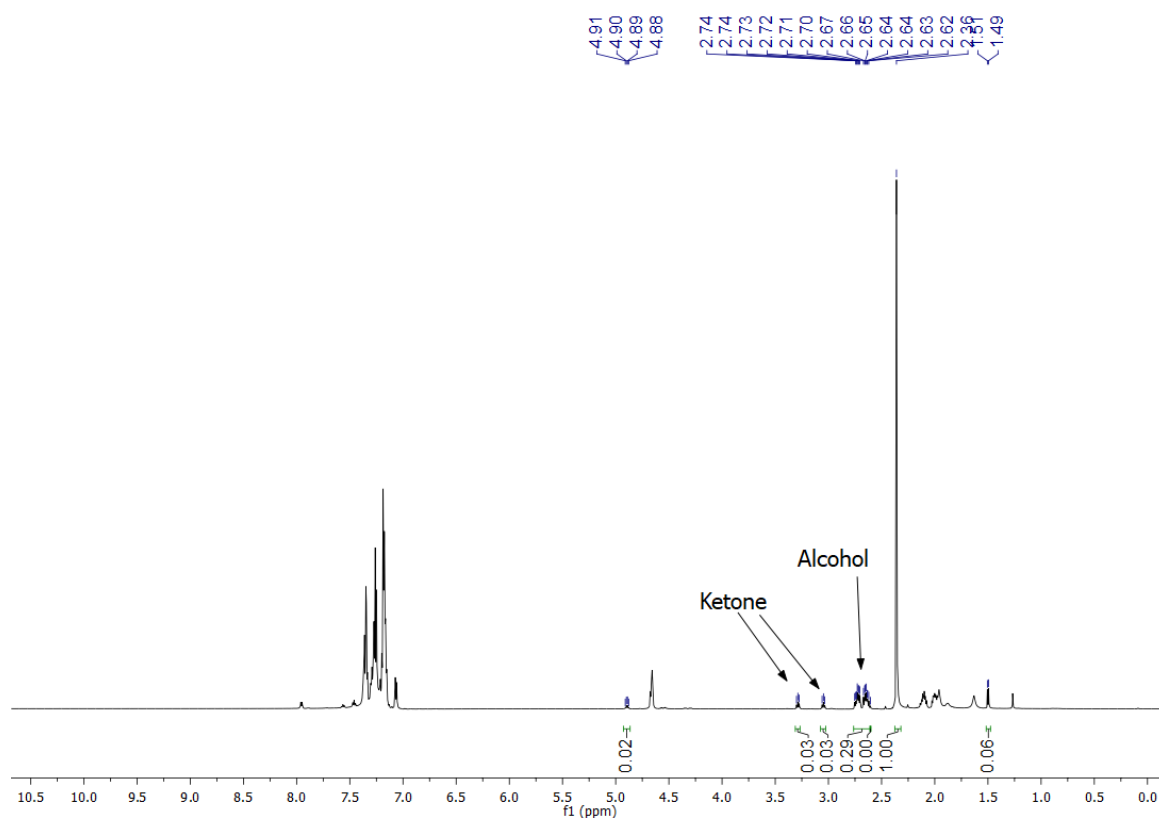

**Figure S11:**  $^1\text{H}$  NMR spectra of  $\beta$ -alkylation of **1j** with **2j** catalyzed by  $\text{CoCl}_2$  (0.01 mol %) at 140  $^\circ\text{C}$  (Table S2, entry 11)<sup>[4, 6]</sup>

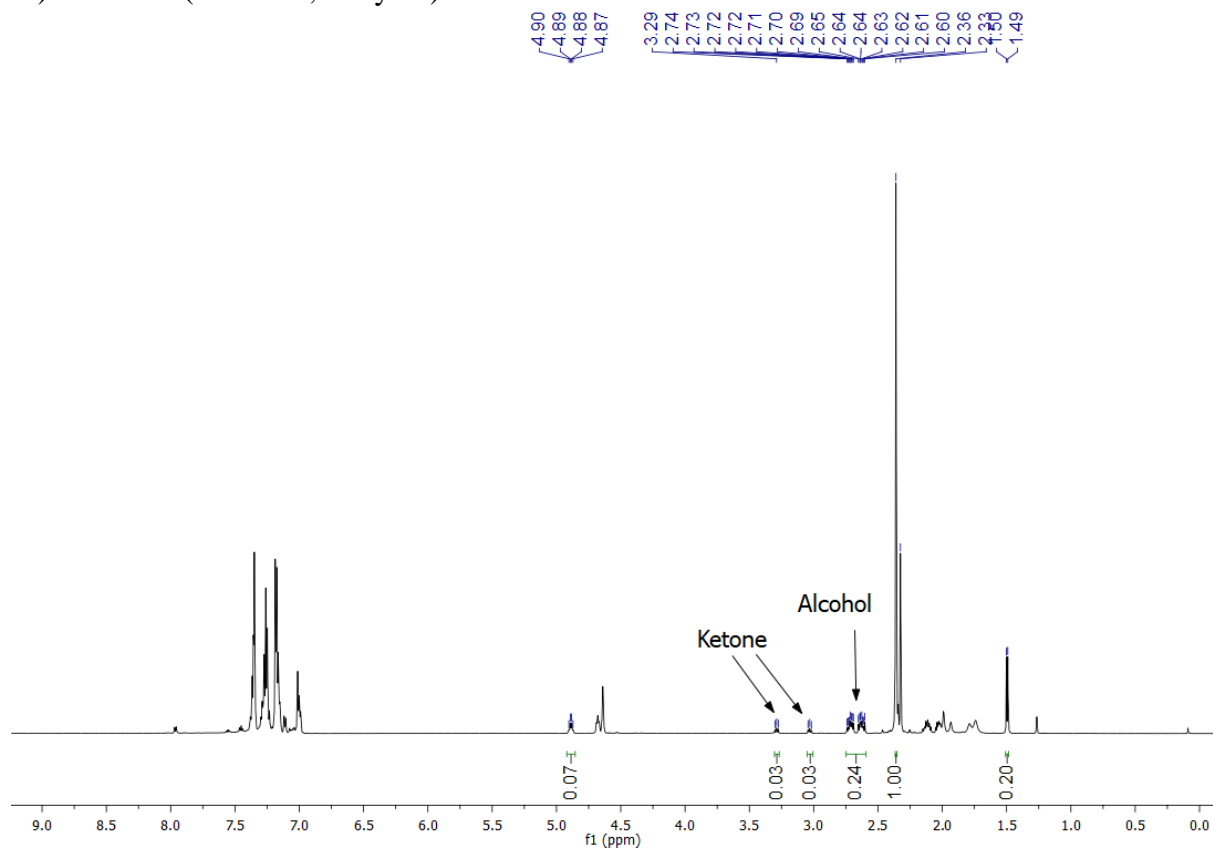

**Figure S12:**  $^1\text{H}$  NMR spectra of  $\beta$ -alkylation of **1k** with **2k** catalyzed by  $\text{CoCl}_2$  (0.01 mol %) at 140  $^\circ\text{C}$  (Table S2, entry 12)<sup>[6]</sup>

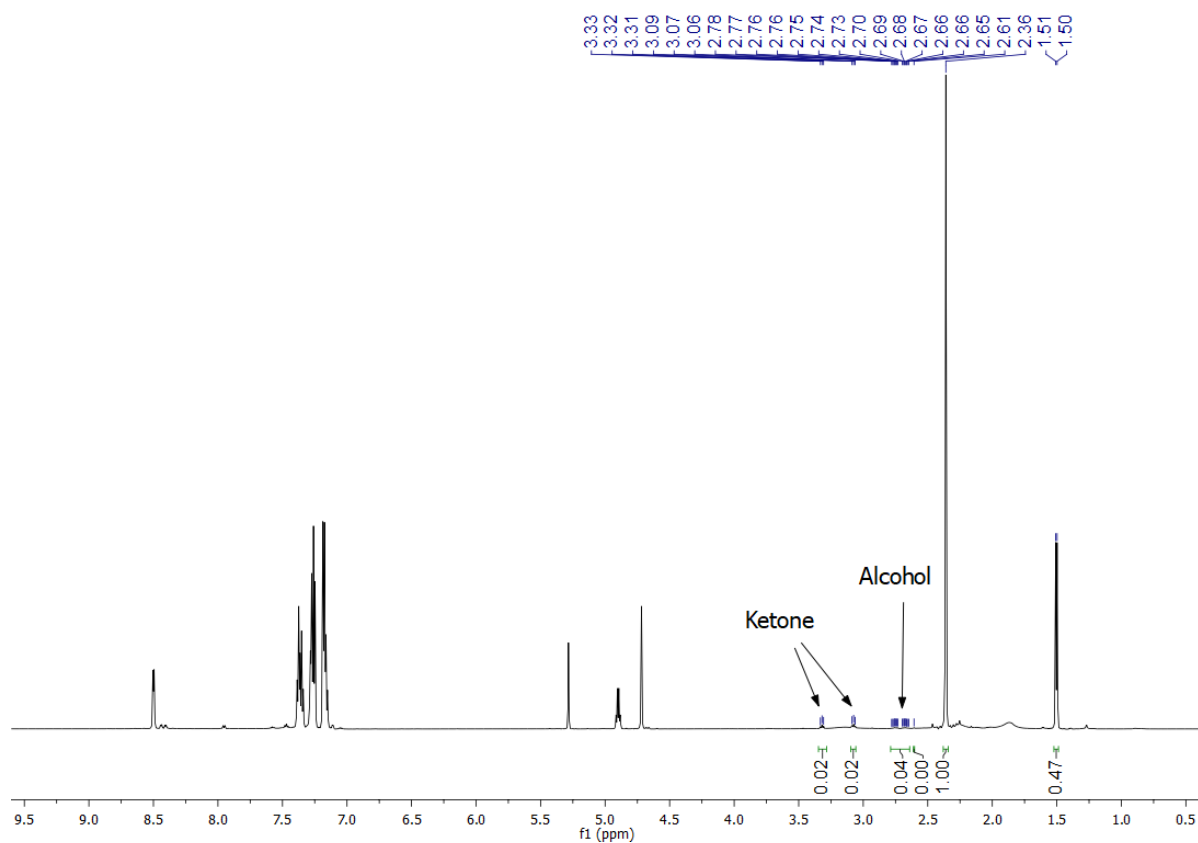

**Figure S13:**  $^1\text{H}$  NMR spectra of  $\beta$ -alkylation of **1l** with **2l** catalyzed by  $\text{CoCl}_2$  (0.01 mol %) at 140 °C (Table S2, entry 13)<sup>[6]</sup>

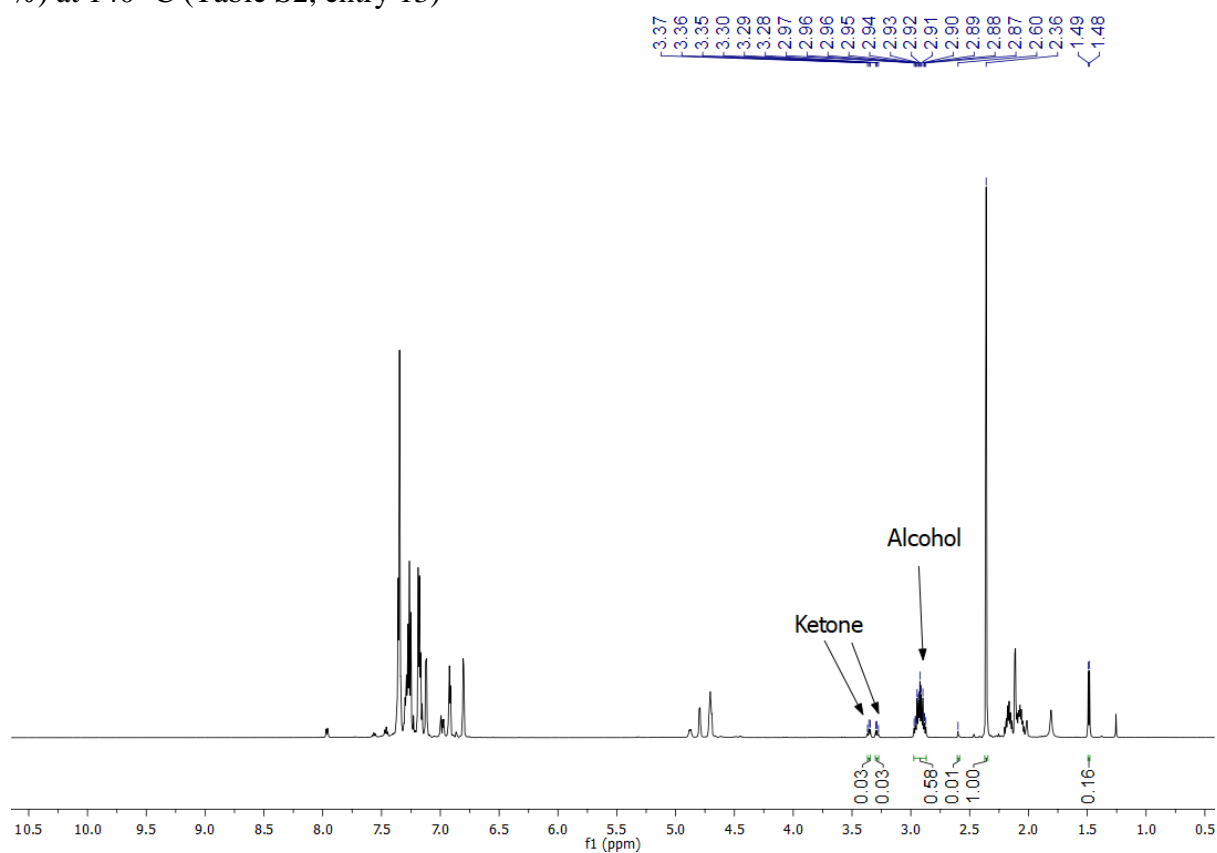

**Figure S14:**  $^1\text{H}$  NMR spectra of  $\beta$ -alkylation of **1m** with **2m** catalyzed by  $\text{CoCl}_2$  (0.01 mol %) at 140 °C (Table S2, entry 14)<sup>[4, 7]</sup>

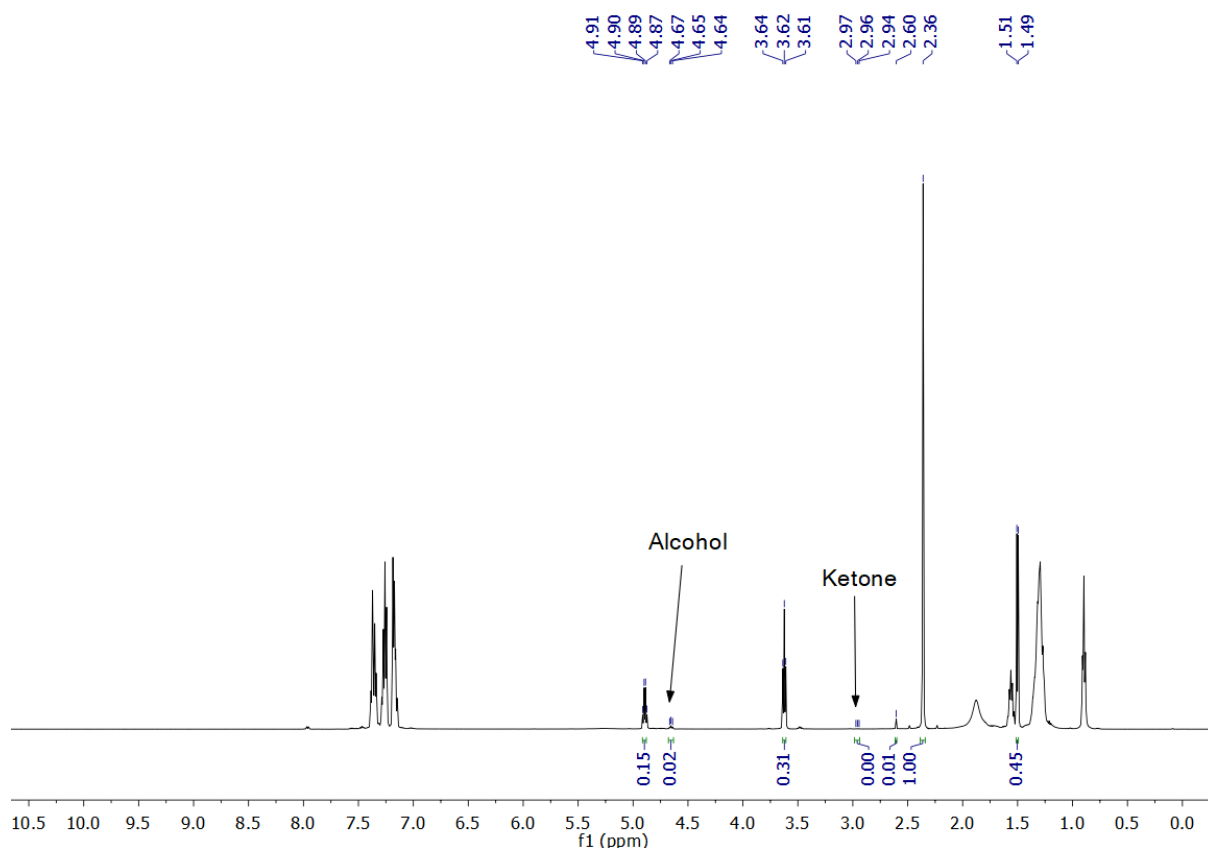

**Figure S15:**  $^1\text{H}$  NMR spectra of  $\beta$ -alkylation of **1n** with **2n** catalyzed by  $\text{CoCl}_2$  (0.01 mol %) at  $140\text{ }^\circ\text{C}$  (Table S2, entry 15)<sup>[3, 4]</sup>

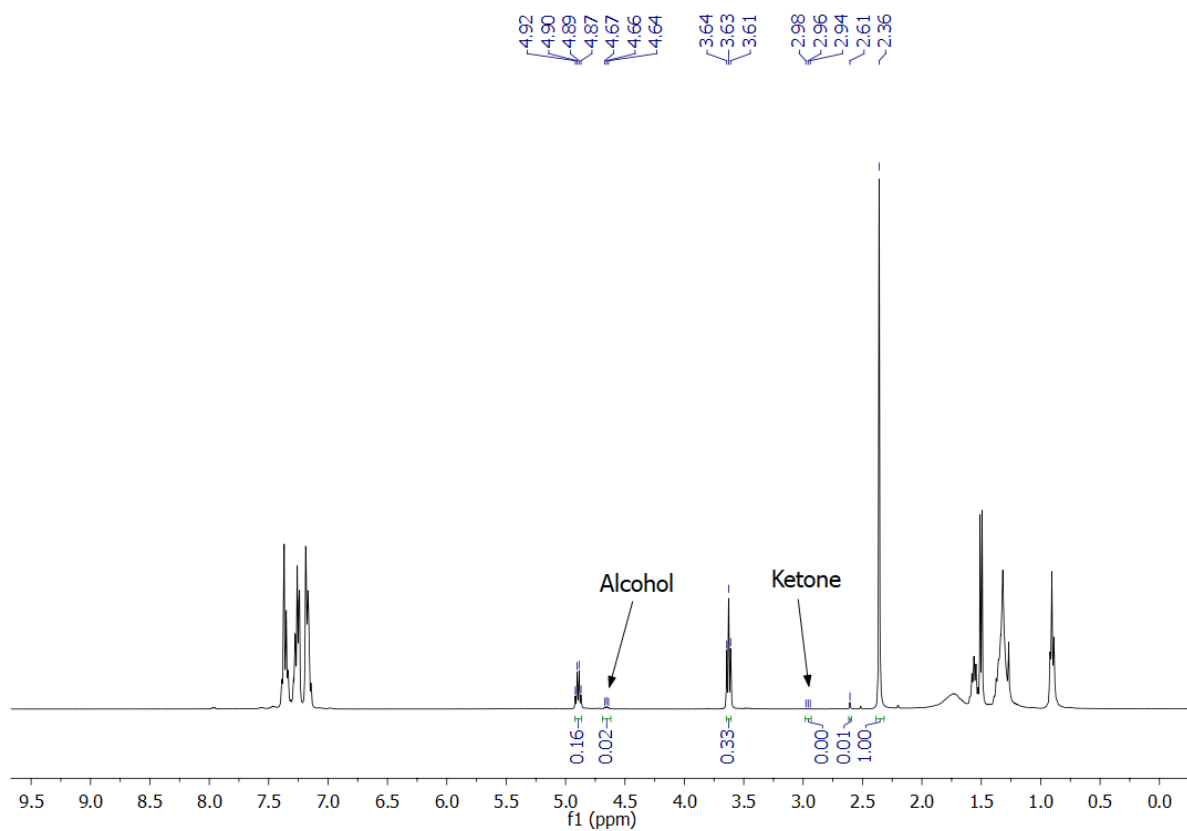

**Figure S16:**  $^1\text{H}$  NMR spectra of  $\beta$ -alkylation of **1o** with **2o** catalyzed by  $\text{CoCl}_2$  (0.01 mol %) at  $140\text{ }^\circ\text{C}$  (Table S2, entry 16)<sup>[4, 5]</sup>

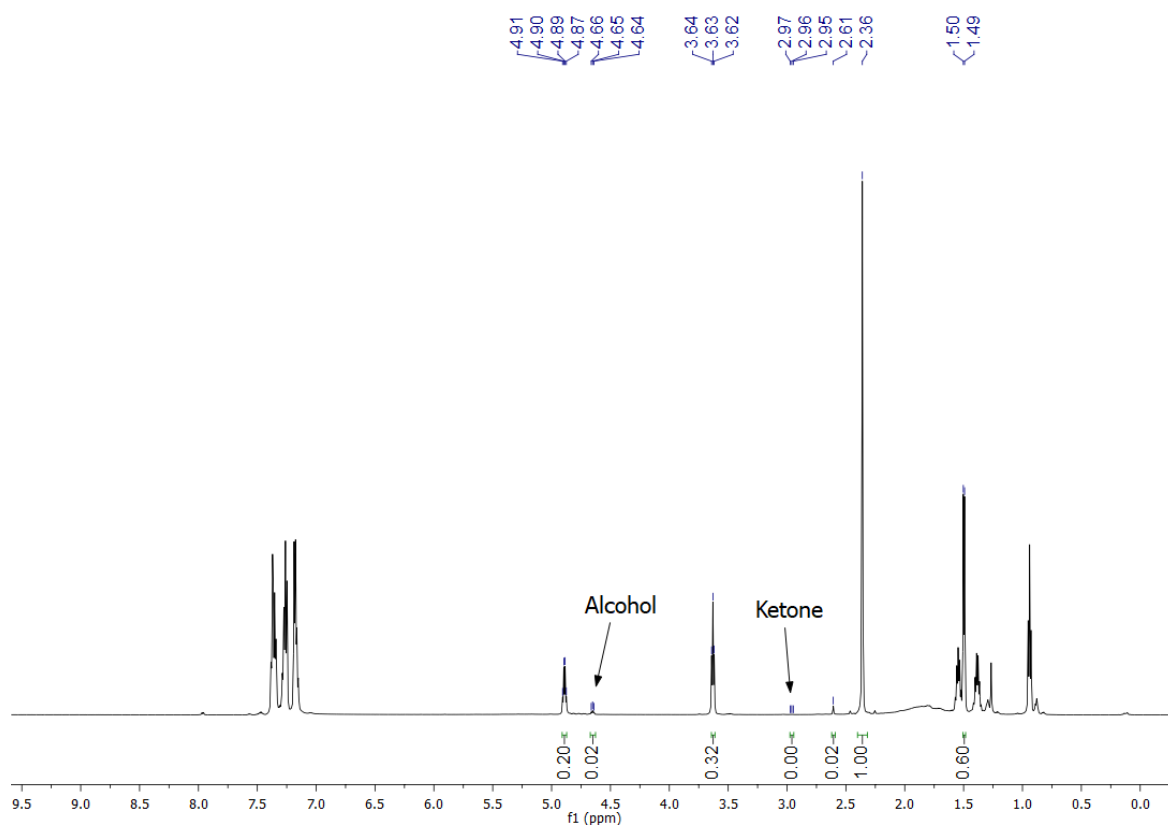

**Figure S17:**  $^1\text{H}$  NMR spectra of  $\beta$ -alkylation of **1p** with **2p** catalyzed by  $\text{CoCl}_2$  (0.01 mol %) at  $140\text{ }^\circ\text{C}$  (Table S2, entry 17)<sup>[4]</sup>

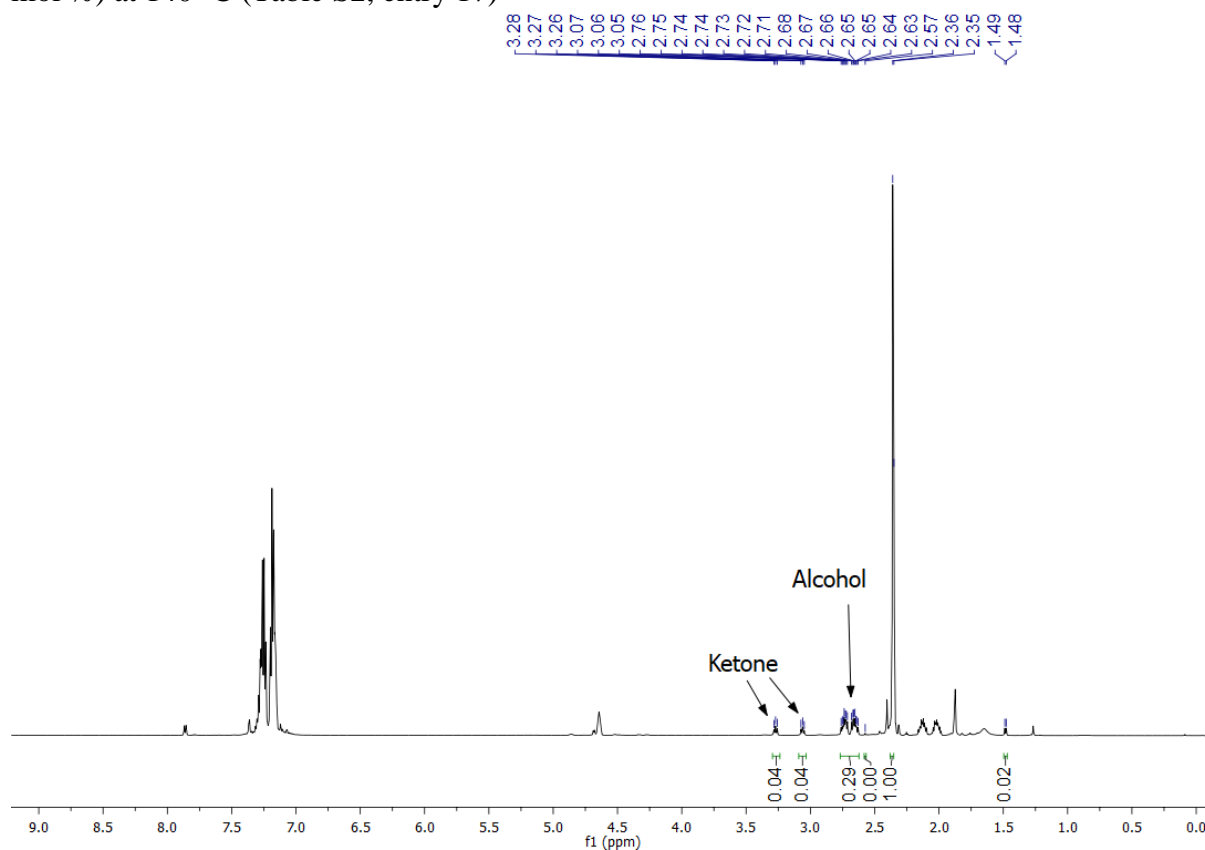

**Figure S18:**  $^1\text{H}$  NMR spectra of  $\beta$ -alkylation of **1q** with **2q** catalyzed by  $\text{CoCl}_2$  (0.01 mol %) at  $140\text{ }^\circ\text{C}$  (Table S2, entry 18)<sup>[4]</sup>

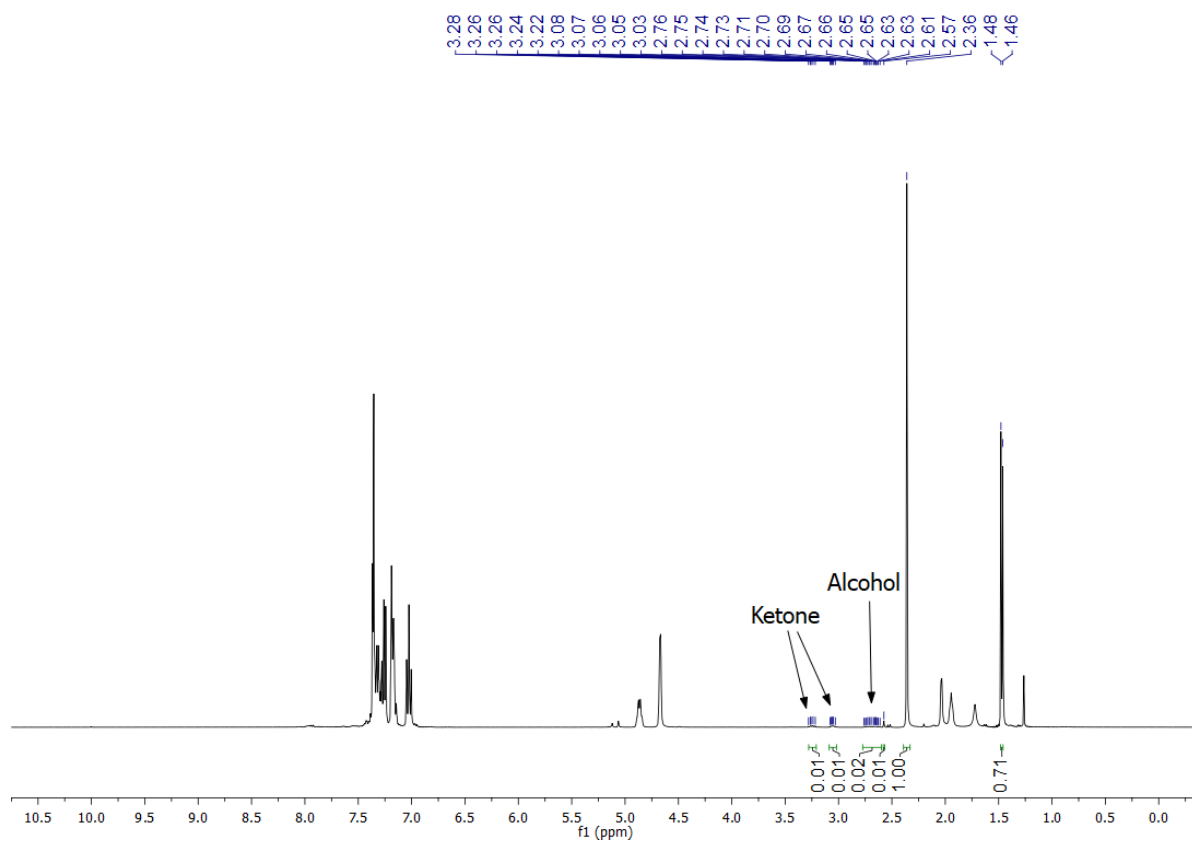

**Figure S19:**  $^1\text{H}$  NMR spectra of  $\beta$ -alkylation of **1r** with **2r** catalyzed by  $\text{CoCl}_2$  (0.01 mol %) at  $140^\circ\text{C}$  (Table S2, entry 19)<sup>[3, 4]</sup>

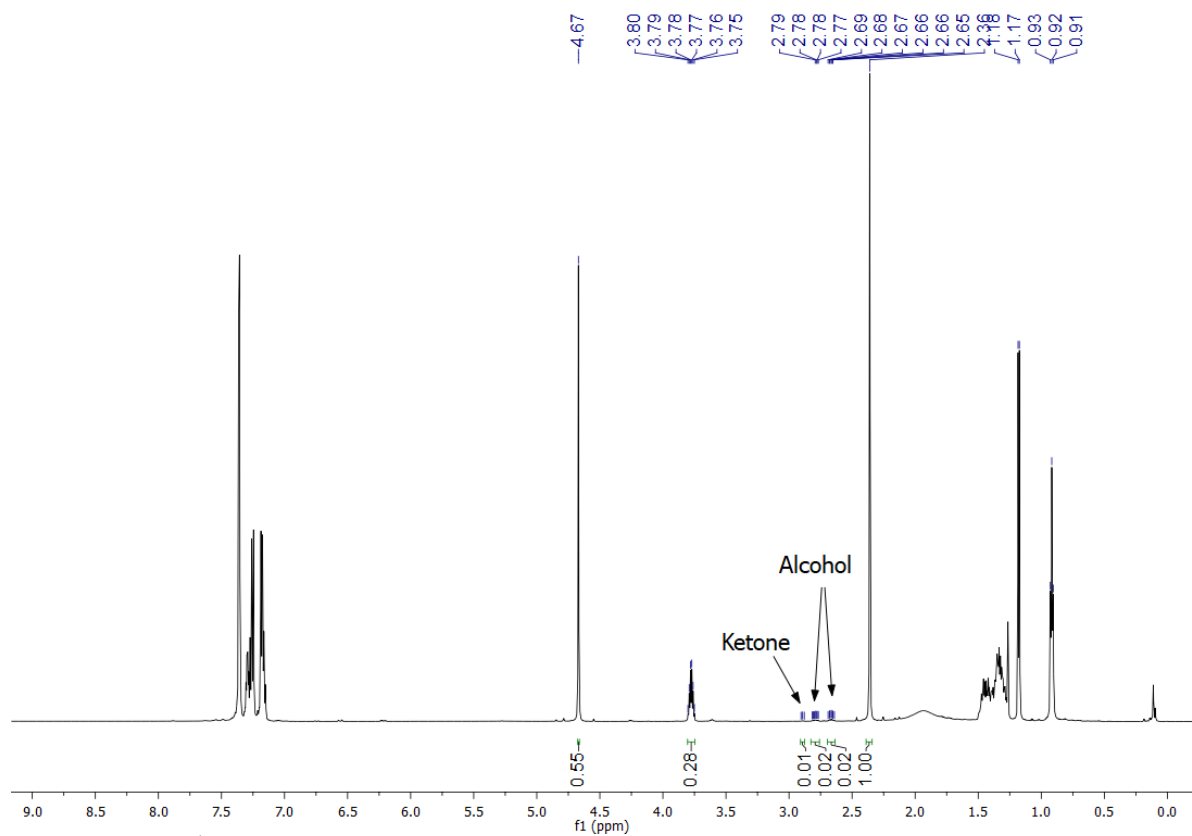

**Figure S20:**  $^1\text{H}$  NMR spectra of  $\beta$ -alkylation of **1s** with **2s** catalyzed by  $\text{CoCl}_2$  (0.01 mol %) at  $140^\circ\text{C}$  (Table S2, entry 20)<sup>[2]</sup>

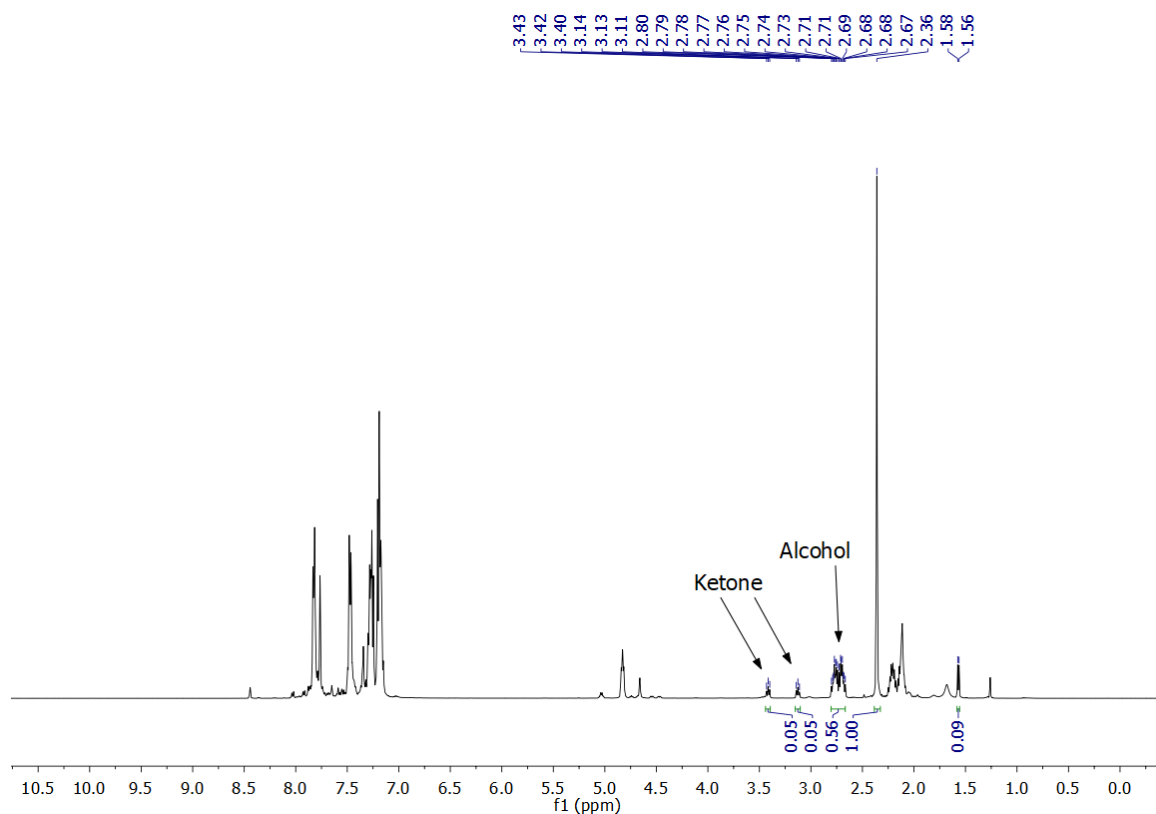

**Figure S21:**  $^1\text{H}$  NMR spectra of  $\beta$ -alkylation of **1t** with **2t** catalyzed by  $\text{CoCl}_2$  (0.01 mol %) at 140 °C (Table S2, entry 21)<sup>[4]</sup>

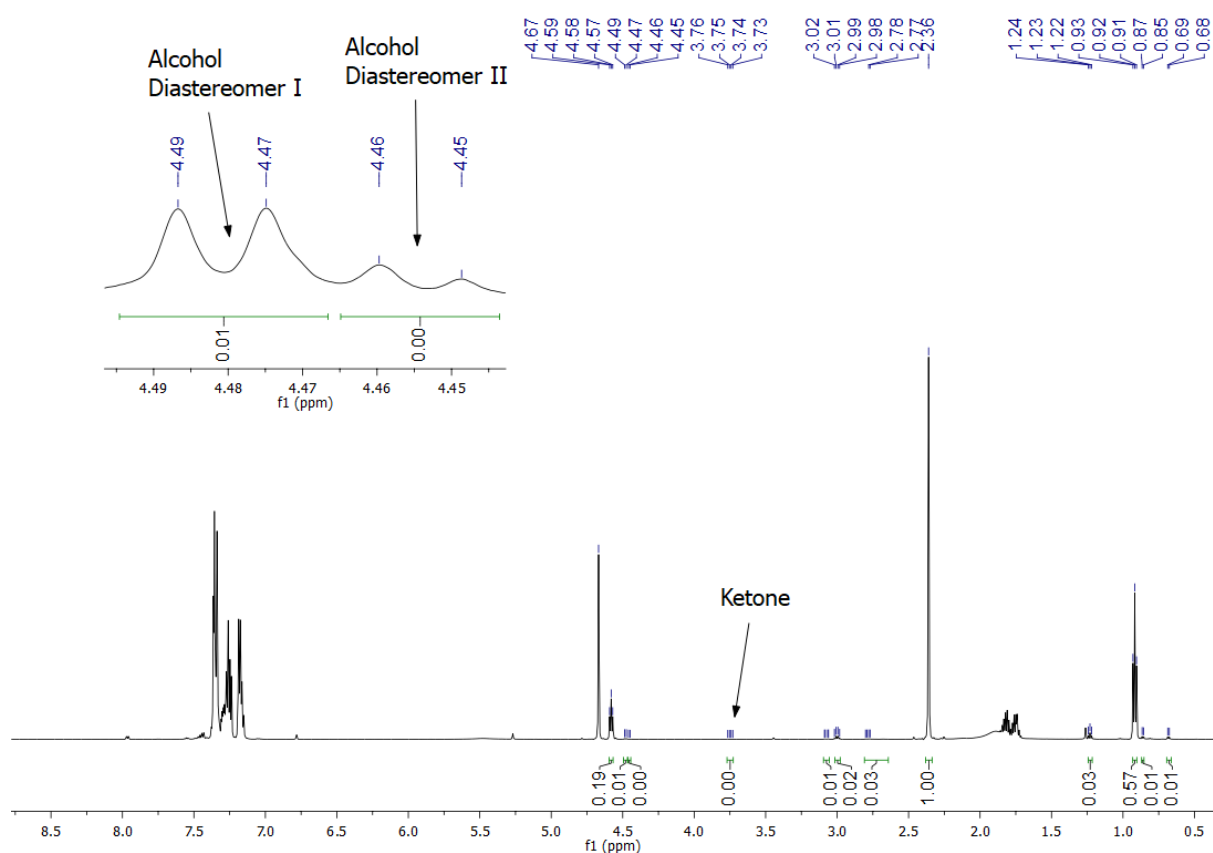

**Figure S22:**  $^1\text{H}$  NMR spectra of  $\beta$ -alkylation of **1u** with **2u** catalyzed by  $\text{CoCl}_2$  (0.01 mol %) at 140 °C (Table S2, entry 22)<sup>[9]</sup>

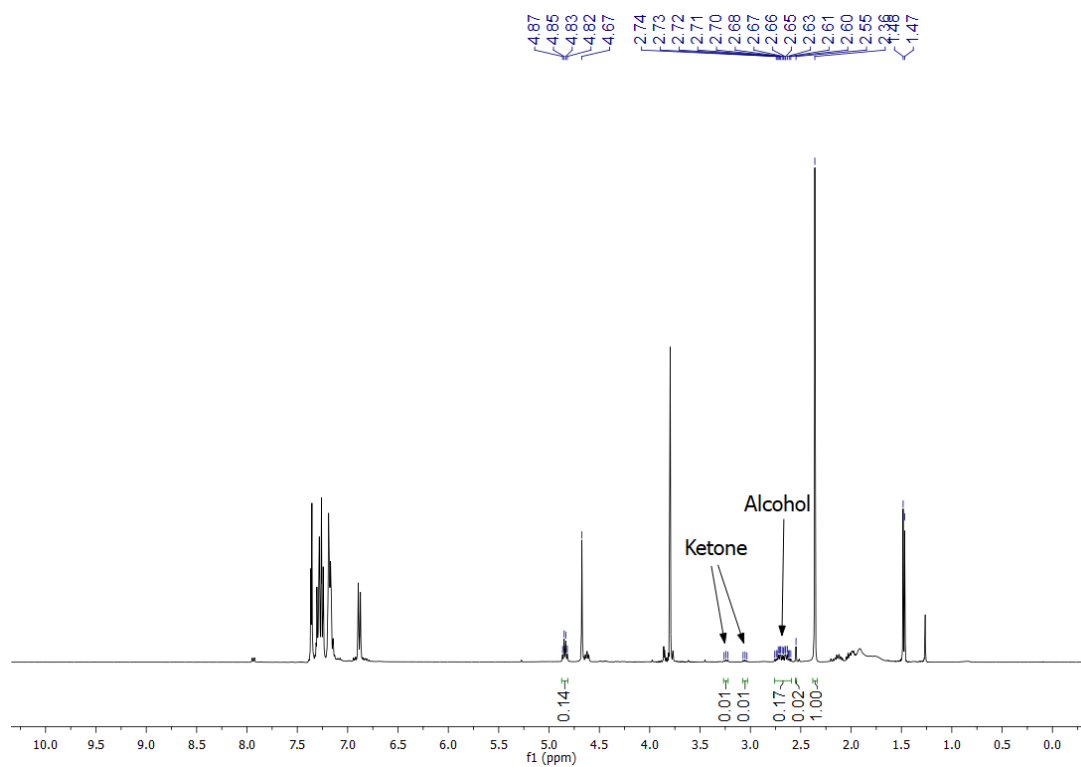

**Figure S23:**  $^1\text{H}$  NMR spectra of  $\beta$ -alkylation of **1v** with **2v** catalyzed by  $\text{CoCl}_2$  (0.01 mol %) at 140  $^\circ\text{C}$  (Table S2, entry 23)<sup>[4]</sup>

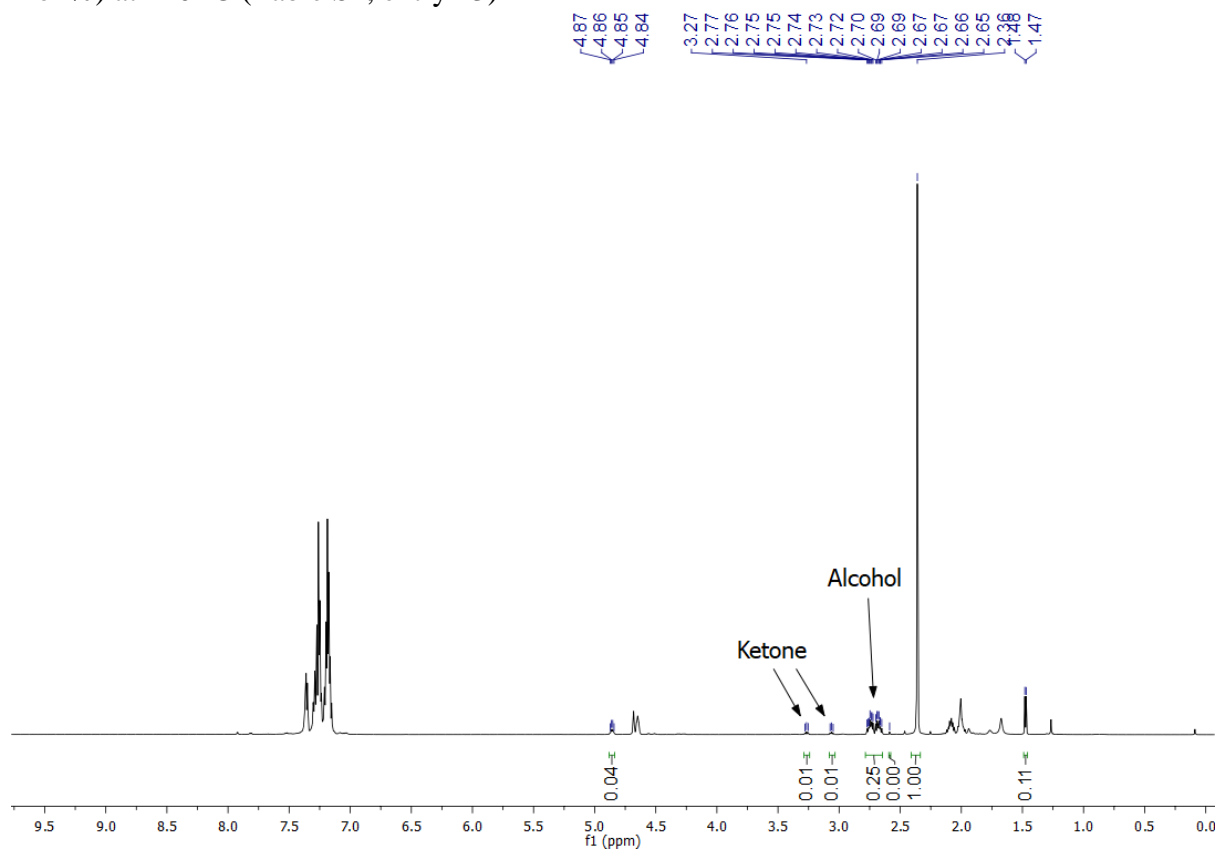

**Figure S24:**  $^1\text{H}$  NMR spectra of  $\beta$ -alkylation of **1w** with **2w** catalyzed by  $\text{CoCl}_2$  (0.01 mol %) at 140  $^\circ\text{C}$  (Table S2, entry 24)<sup>[6]</sup>



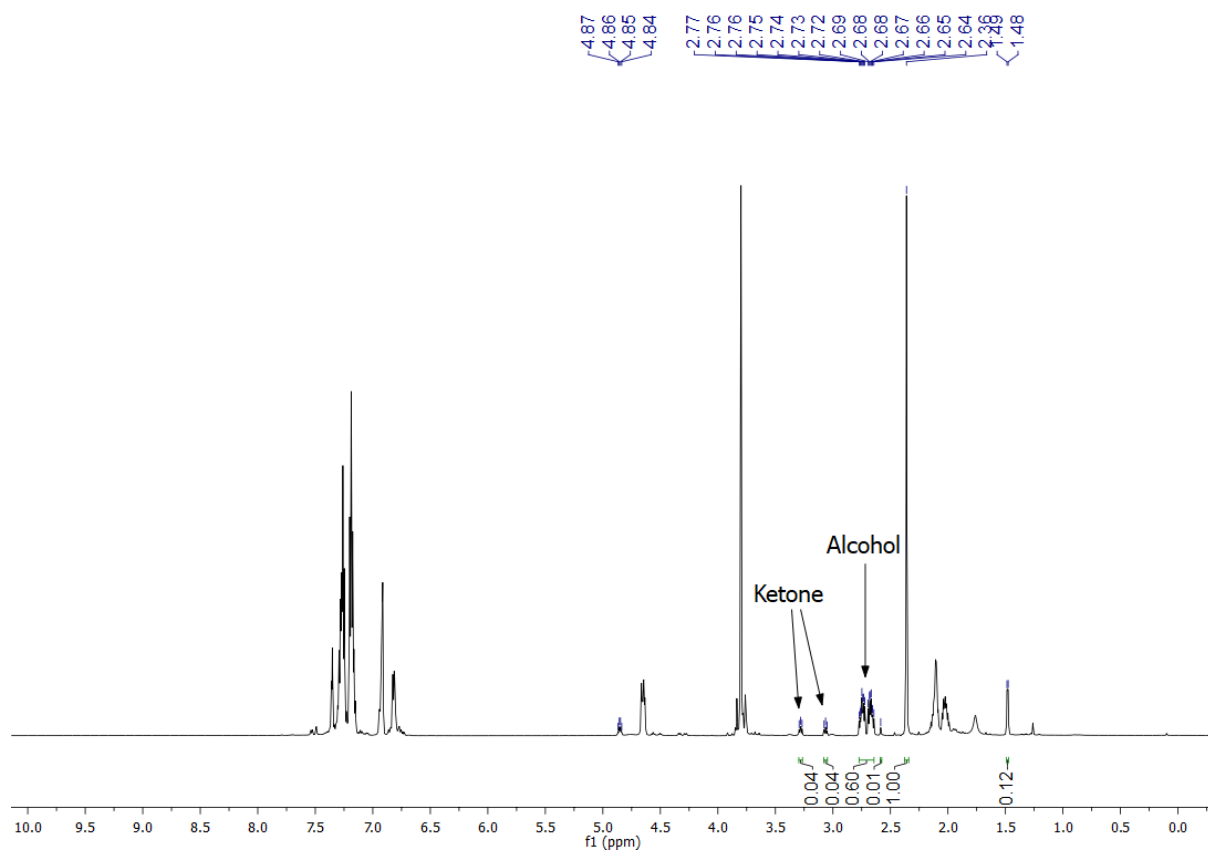

**Figure S25:**  $^1\text{H}$  NMR spectra of  $\beta$ -alkylation of **1x** with **2x** catalyzed by  $\text{CoCl}_2$  (0.01 mol %) at  $140^\circ\text{C}$  (Table S2, entry 25)<sup>[4]</sup>

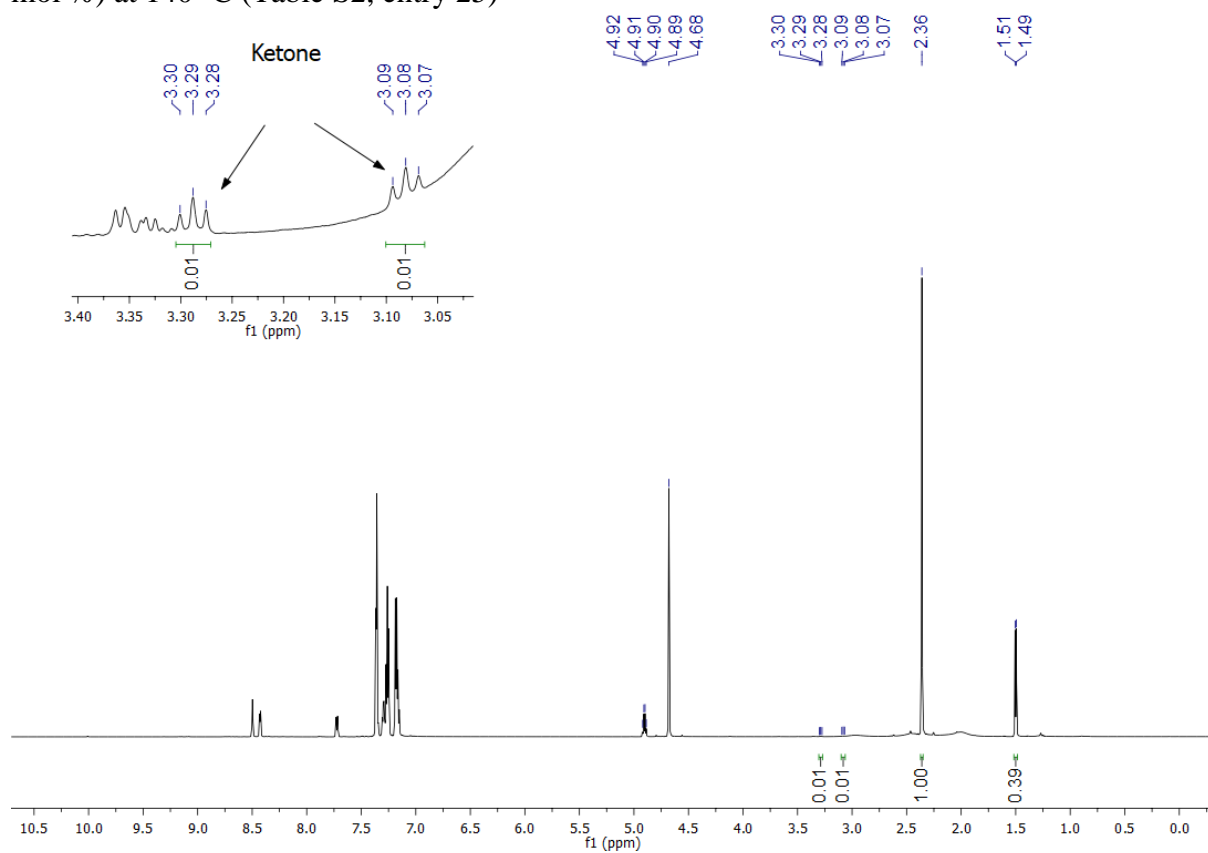

**Figure S26:**  $^1\text{H}$  NMR spectra of  $\beta$ -alkylation of **1y** with **2y** catalyzed by  $\text{CoCl}_2$  (0.01 mol %) at  $140^\circ\text{C}$  (Table S2, entry 26)<sup>[4]</sup>

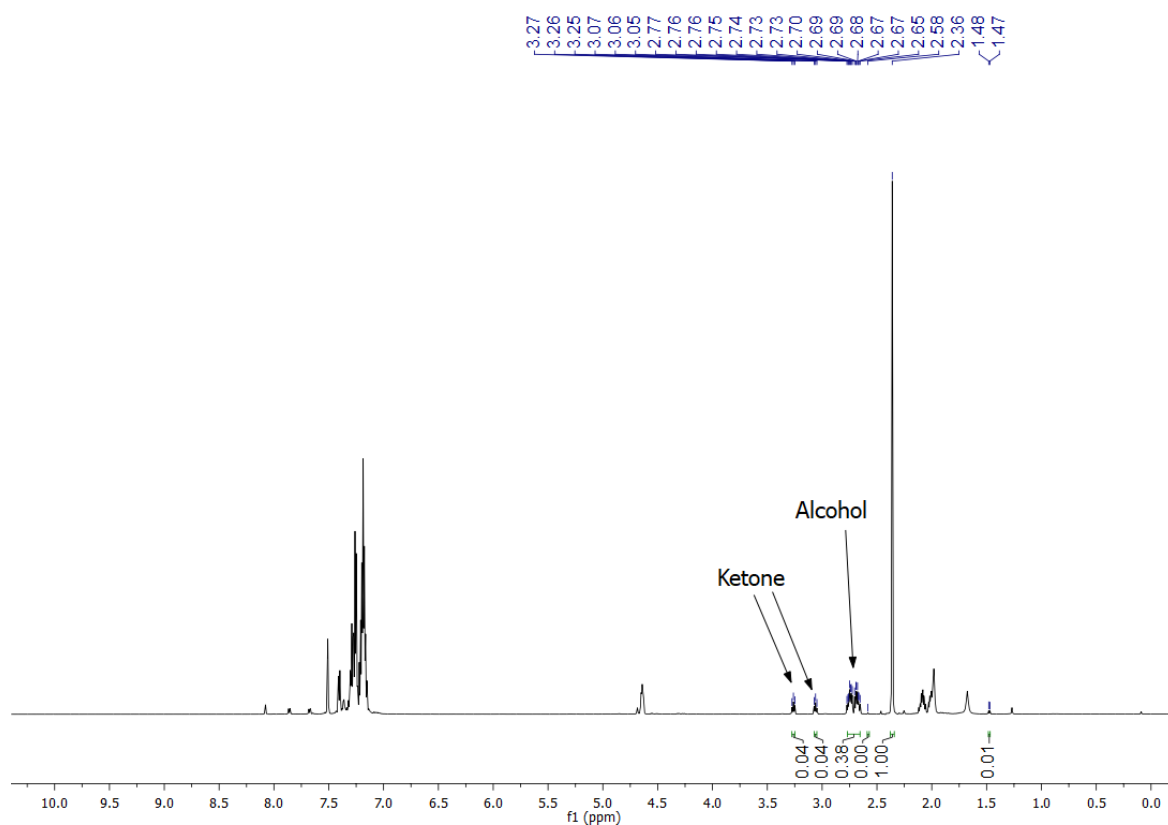

**Figure S27:**  $^1\text{H}$  NMR spectra of  $\beta$ -alkylation of **1z** with **2z** catalyzed by  $\text{CoCl}_2$  (0.01 mol %) at  $140\text{ }^\circ\text{C}$  (Table S2, entry 27)<sup>[6]</sup>

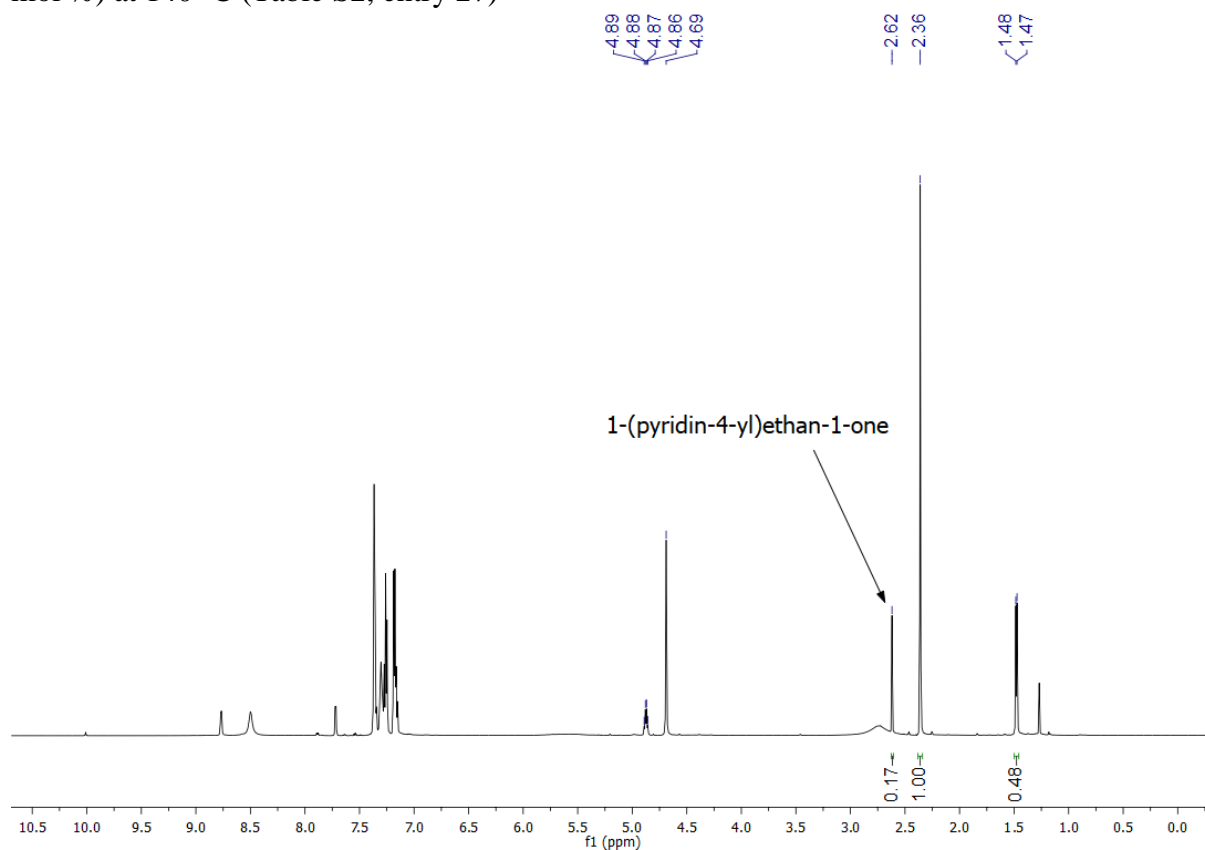

**Figure S28:**  $^1\text{H}$  NMR spectra of  $\beta$ -alkylation of **1za** with **2za** catalyzed by  $\text{CoCl}_2$  (0.01 mol %) at  $140\text{ }^\circ\text{C}$  (Table S2, entry 28)<sup>[10]</sup>

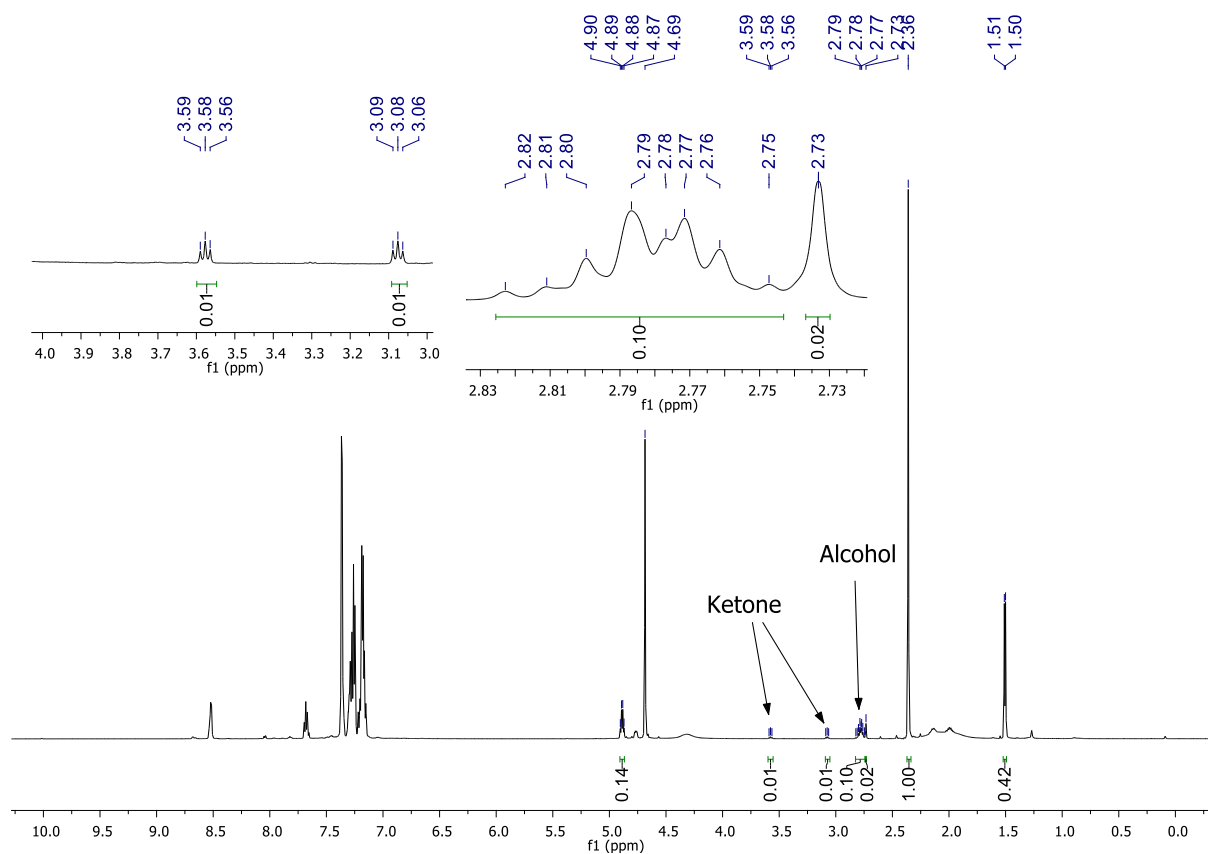

**Figure S29:**  $^1\text{H}$  NMR spectra of  $\beta$ -alkylation of **1zb** with **2zb** catalyzed by  $\text{CoCl}_2$  (0.01 mol %) at  $140^\circ\text{C}$  (Table S2, entry 29)<sup>[2]</sup>

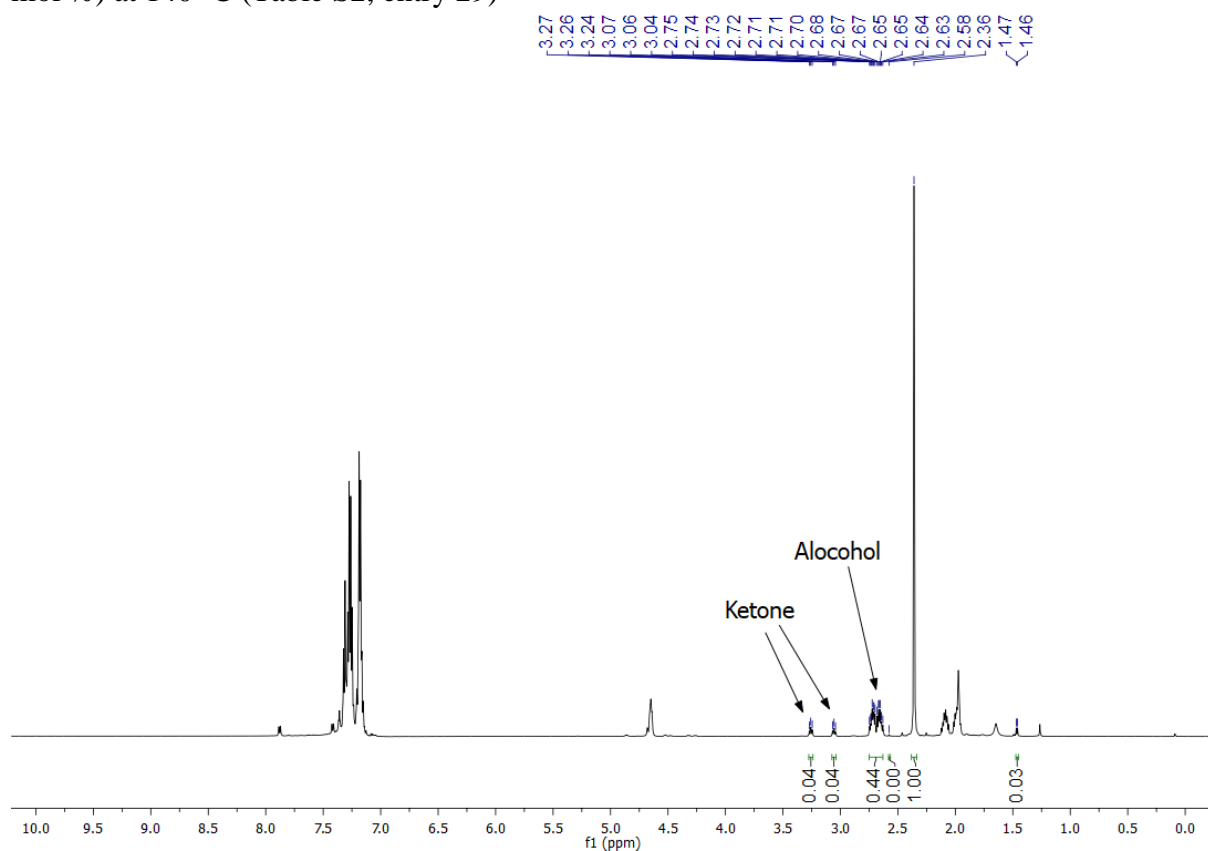

**Figure S30:**  $^1\text{H}$  NMR spectra of  $\beta$ -alkylation of **1zc** with **2zc** catalyzed by  $\text{CoCl}_2$  (0.01 mol %) at  $140^\circ\text{C}$  (Table S2, entry 30)<sup>[4, 6]</sup>

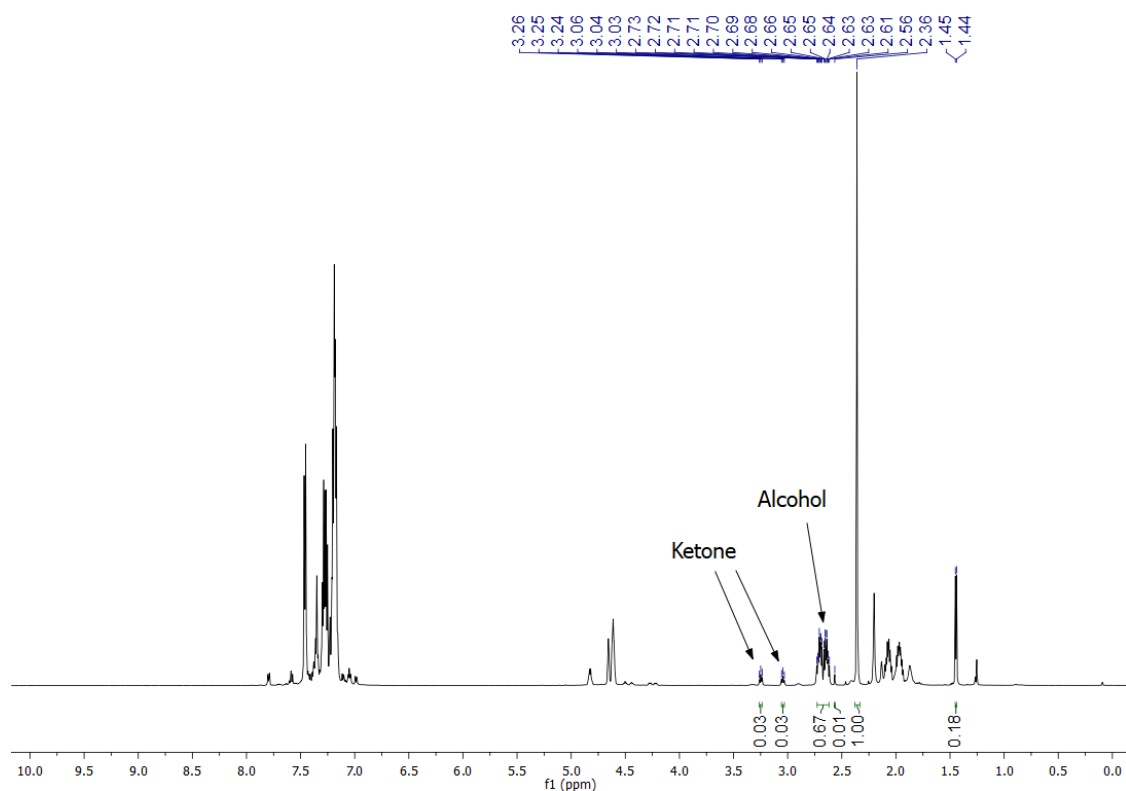

**Figure S31:**  $^1\text{H}$  NMR spectra of  $\beta$ -alkylation of **1zd** with **2zd** catalyzed by  $\text{CoCl}_2$  (0.01 mol %) at  $140\text{ }^\circ\text{C}$  (Table S2, entry 31)<sup>[6]</sup>

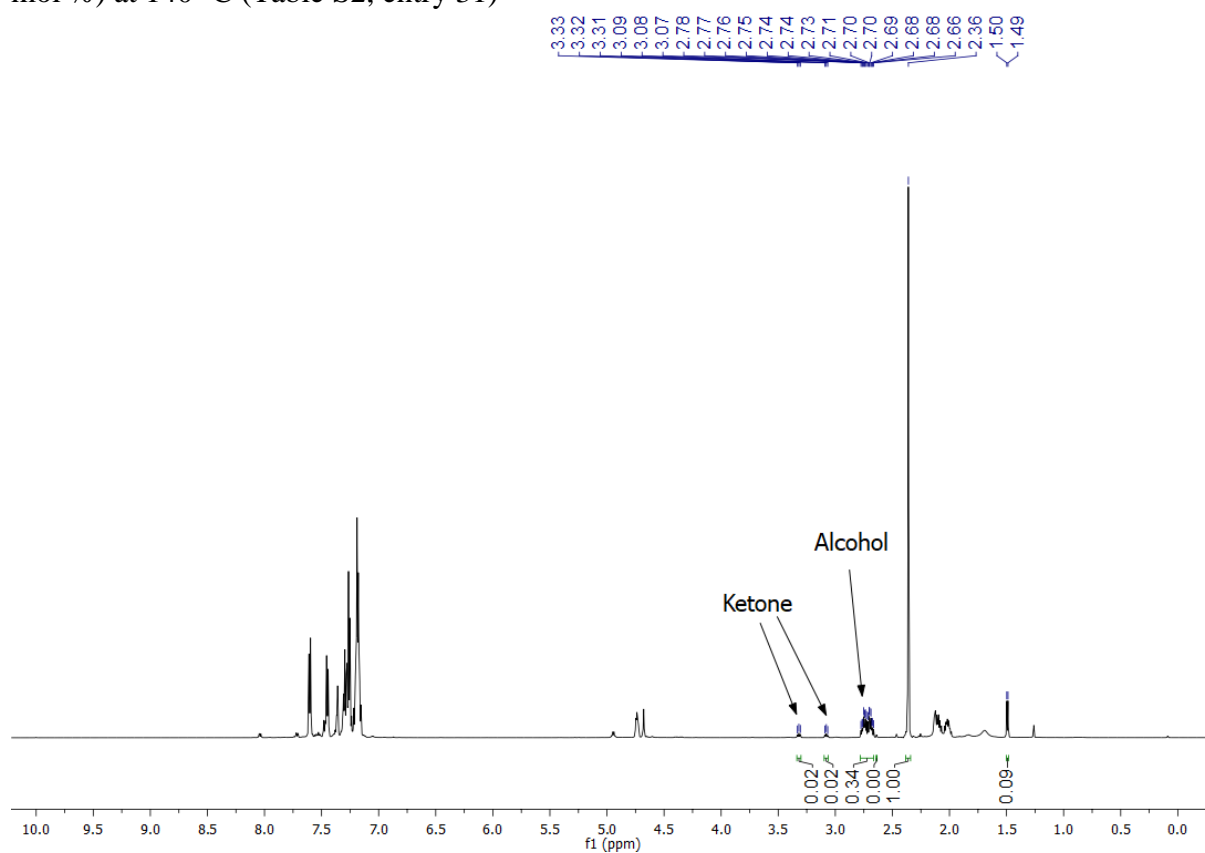

**Figure S32:**  $^1\text{H}$  NMR spectra of  $\beta$ -alkylation of **1ze** with **2ze** catalyzed by  $\text{CoCl}_2$  (0.01 mol %) at  $140\text{ }^\circ\text{C}$  (Table S2, entry 32)<sup>[2, 6]</sup>

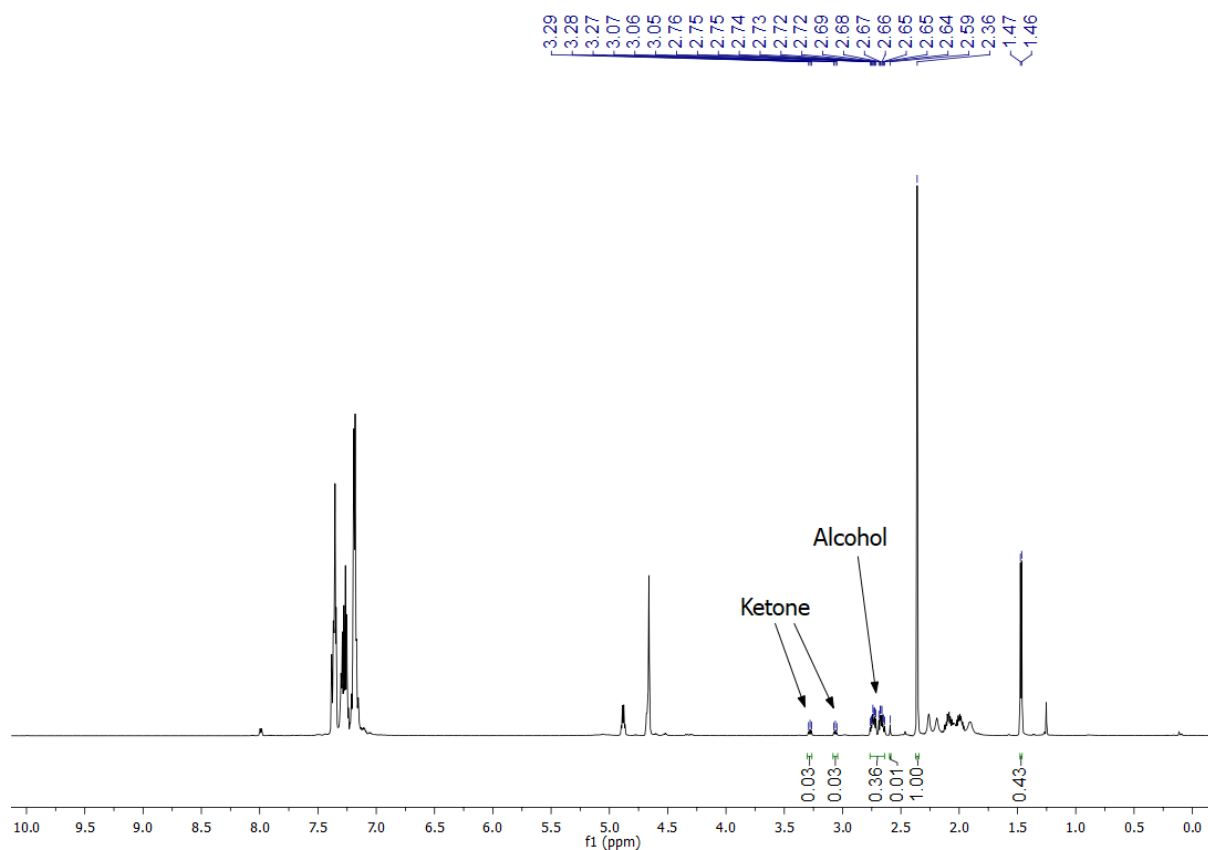

**Figure S33:**  $^1\text{H}$  NMR spectra of  $\beta$ -alkylation of **1zf** with **2zf** catalyzed by  $\text{CoCl}_2$  (0.01 mol %) at  $140\text{ }^\circ\text{C}$  (Table S2, entry 33)<sup>[13]</sup>

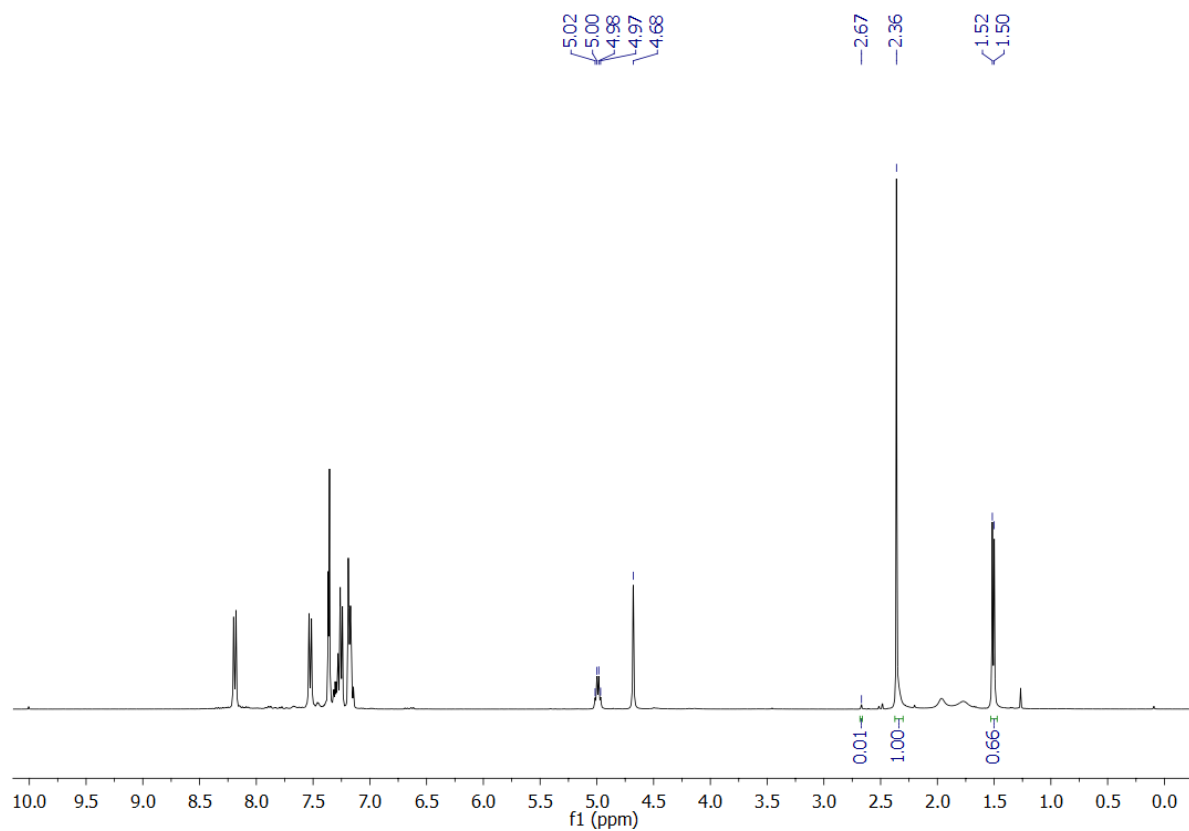

**Figure S34:**  $^1\text{H}$  NMR spectra of  $\beta$ -alkylation of **1zg** with **2zg** catalyzed by  $\text{CoCl}_2$  (0.01 mol %) at  $140\text{ }^\circ\text{C}$  (Table S2, entry 34)<sup>[11]</sup>

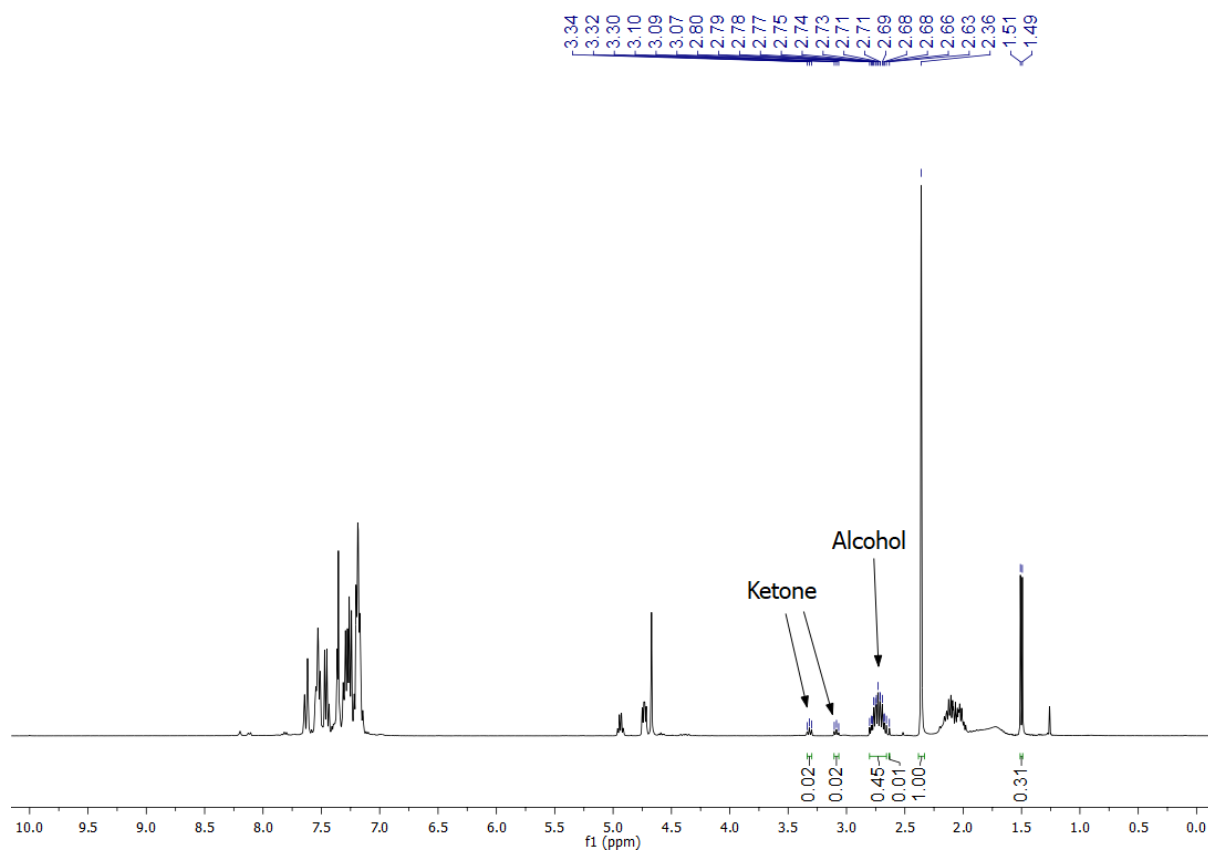

**Figure S35:**  $^1\text{H}$  NMR spectra of  $\beta$ -alkylation of **1zh** with **2zh** catalyzed by  $\text{CoCl}_2$  (0.01 mol %) at  $140\text{ }^\circ\text{C}$  (Table S2, entry 35)<sup>[6]</sup>

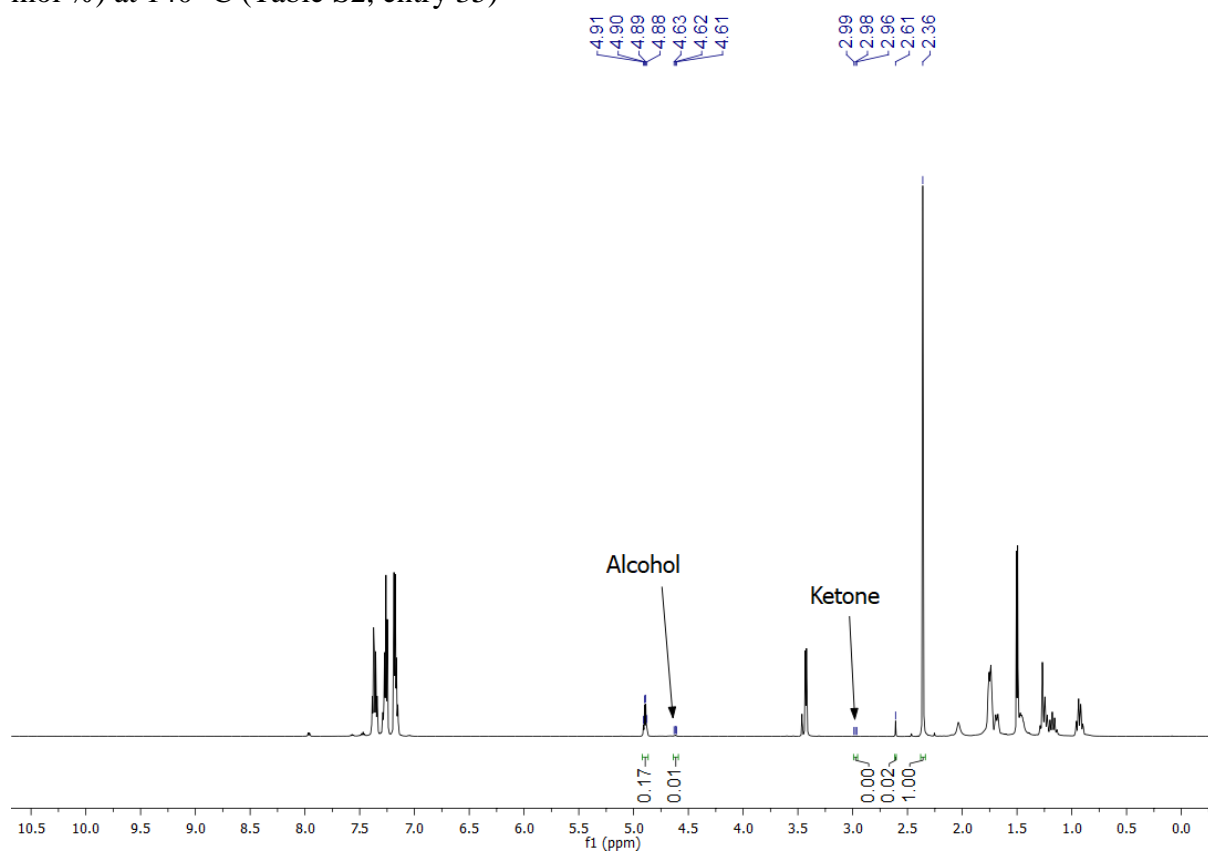

**Figure S36:**  $^1\text{H}$  NMR spectra of  $\beta$ -alkylation of **1zi** with **2zi** catalyzed by  $\text{CoCl}_2$  (0.01 mol %) at  $140\text{ }^\circ\text{C}$  (Table S2, entry 36)<sup>[4]</sup>

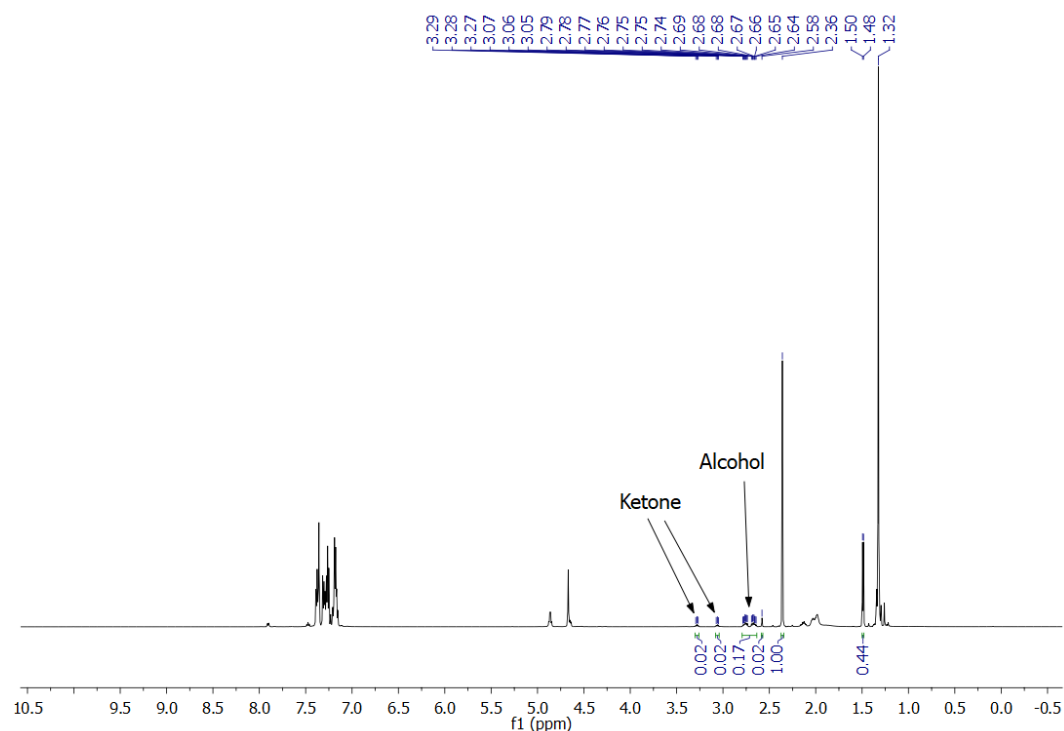

**Figure S37:**  $^1\text{H}$  NMR spectra of  $\beta$ -alkylation of **1zj** with **2zj** catalyzed by  $\text{CoCl}_2$  (0.01 mol %) at 140 °C (Table S2, entry 37)<sup>[12]</sup>

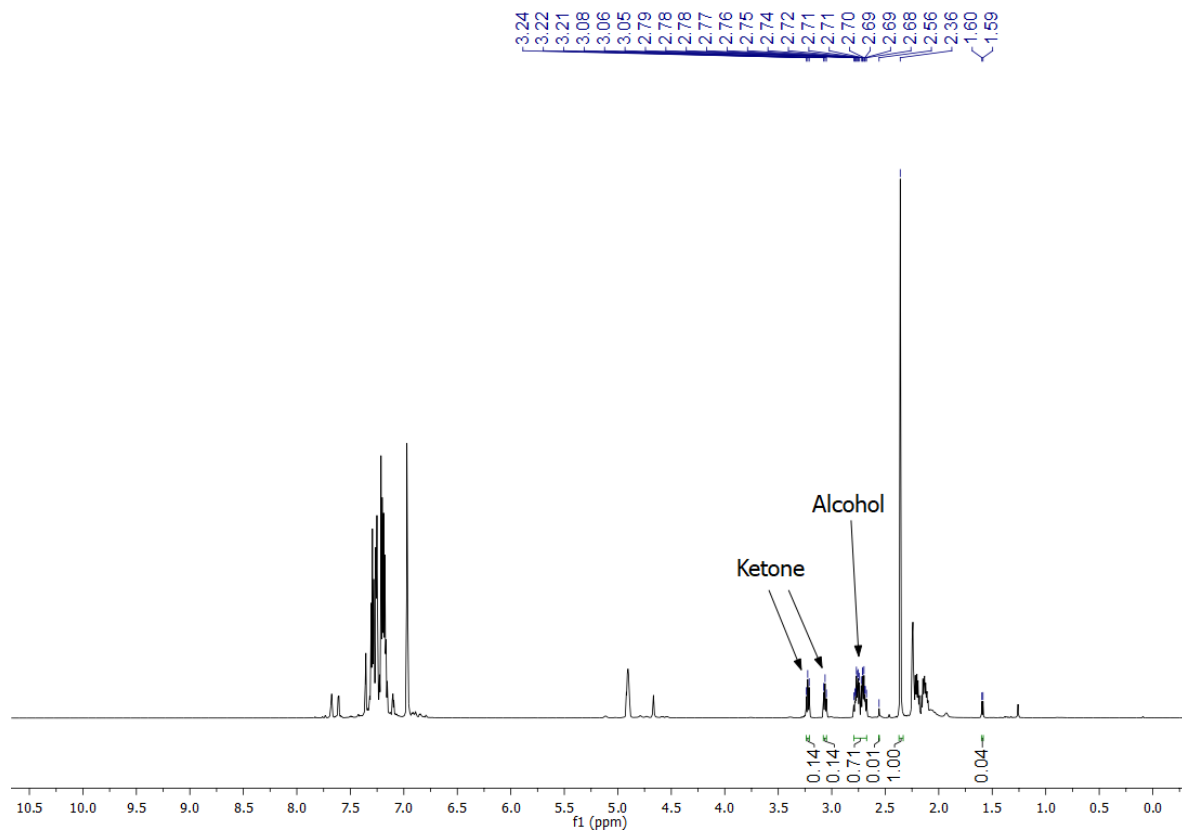

**Figure S38:**  $^1\text{H}$  NMR spectra of  $\beta$ -alkylation of **1zk** with **2zk** catalyzed by  $\text{CoCl}_2$  (0.01 mol %) at 140 °C (Table S2, entry 38)<sup>[8]</sup>

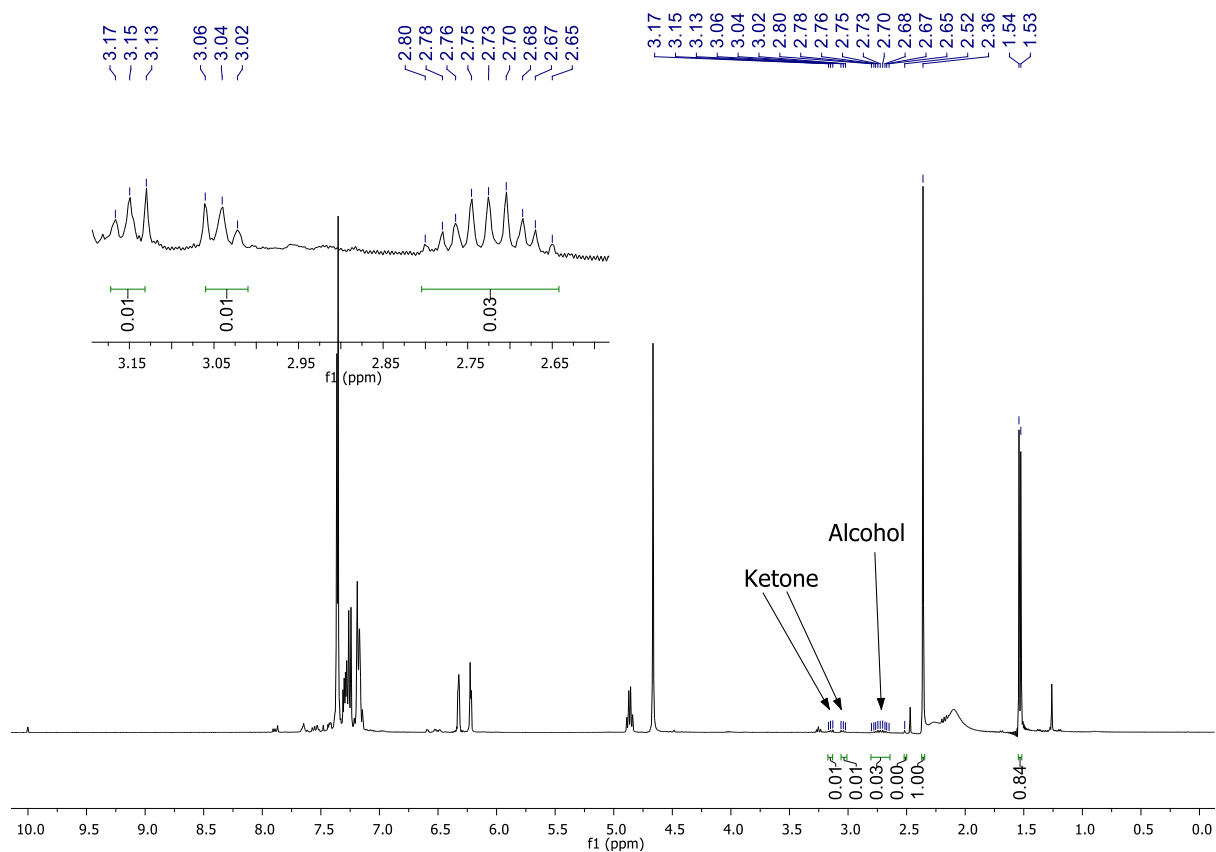

**Figure S39:**  $^1\text{H}$  NMR spectra of  $\beta$ -alkylation of **1zI** with **2zI** catalyzed by  $\text{CoCl}_2$  (0.01 mol %) at  $140\text{ }^\circ\text{C}$  (Table S2, entry 39)<sup>[2]</sup>

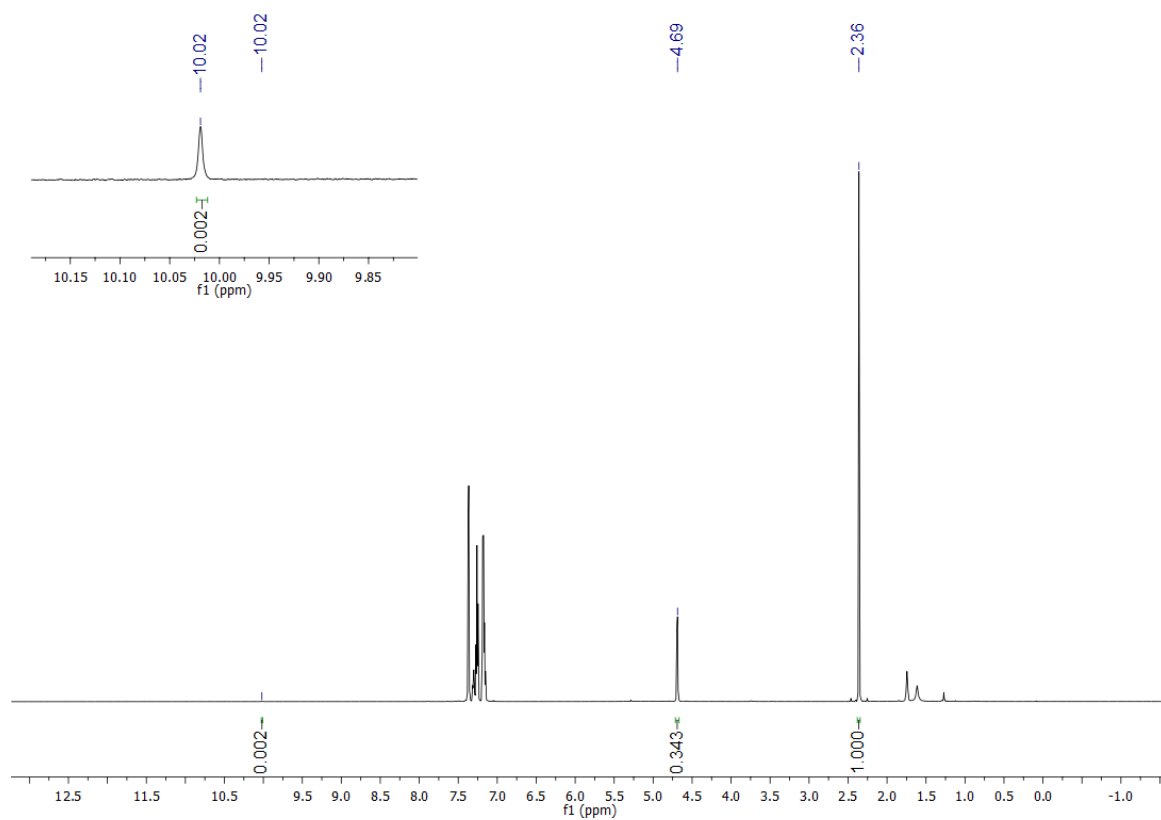

**Figure S40:**  $^1\text{H}$  NMR spectra of benzyl alcohol in presence  $\text{CoCl}_2$  (0.01 mol %) and  $\text{NaOBu}$  (2.5 mol %) at  $140\text{ }^\circ\text{C}$



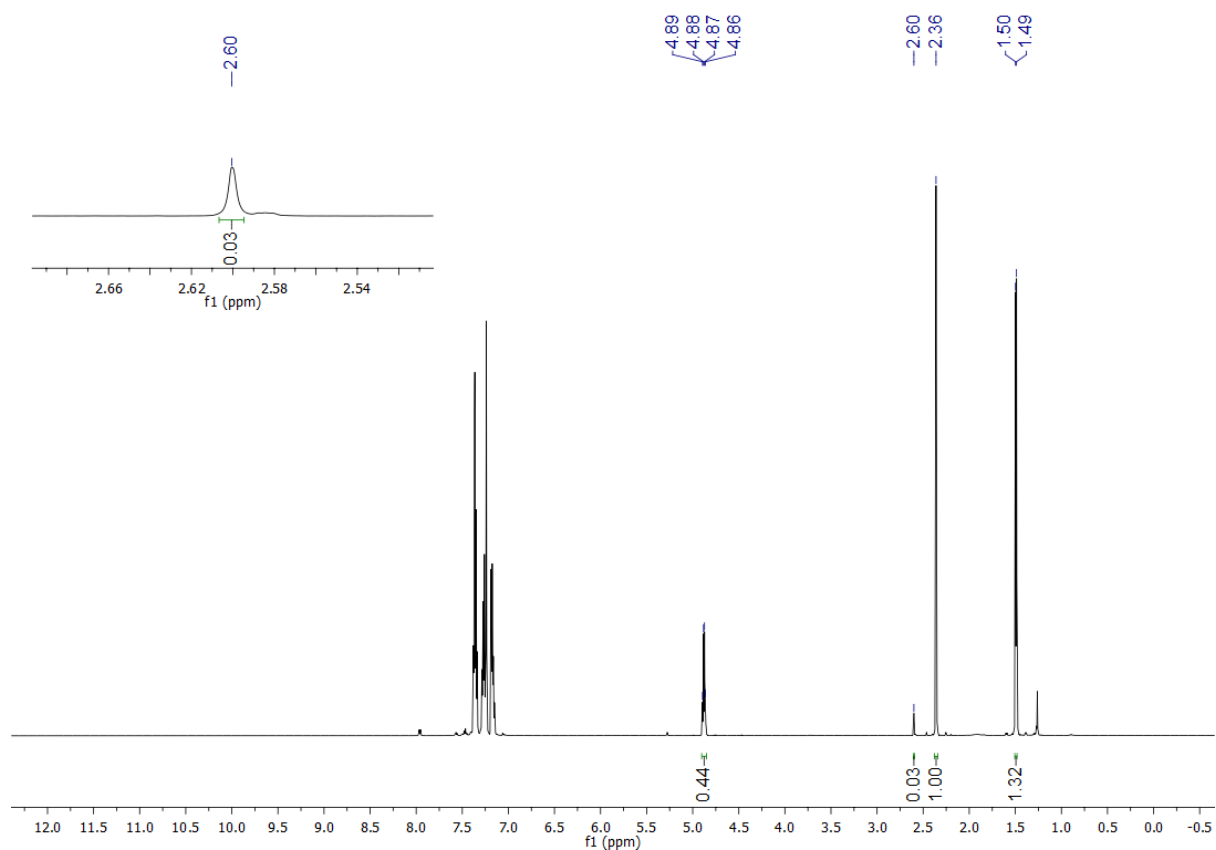

**Figure S41:**  $^1\text{H}$  NMR spectra of 1-phenyl ethanol in presence  $\text{CoCl}_2$  (0.01 mol %) and  $\text{NaO}^t\text{Bu}$  (2.5 mol %) at  $140\text{ }^\circ\text{C}$

#### 4. HRMS Analysis

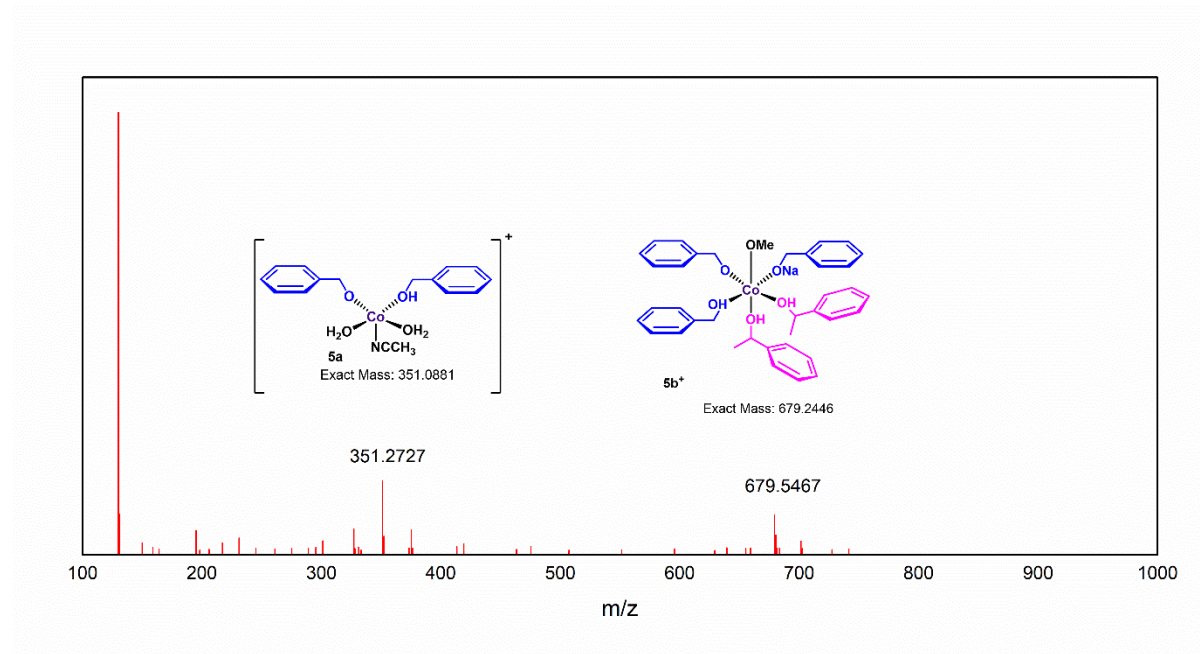

**Figure S42:** HRMS(ESI) spectra of spectra of  $\beta$ -alkylation of **1** with **2** catalyzed by  $\text{CoCl}_2$  (0.1 mol %) and  $\text{NaO}^t\text{Bu}$  (2.5 mol %) at  $t = 0\text{ h}$  at  $140\text{ }^\circ\text{C}$ .

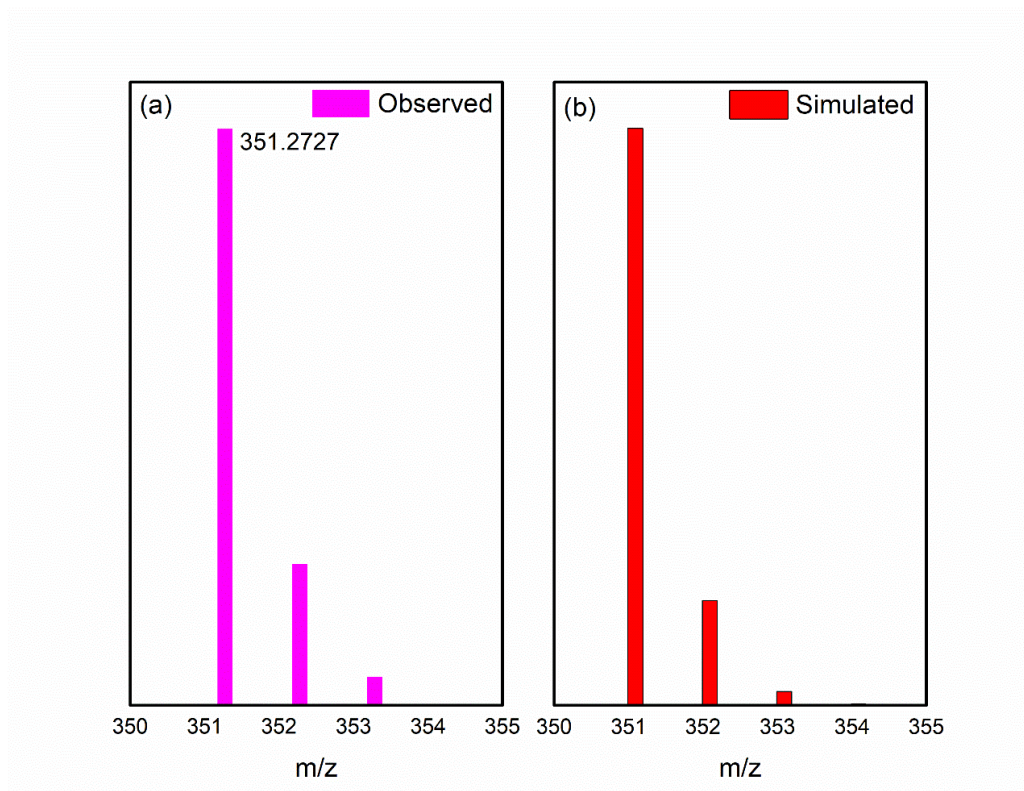

**Figure S43:** HRMS(ESI) expanded spectra of m/z 351.2727 (a) Observed (b) Simulated.

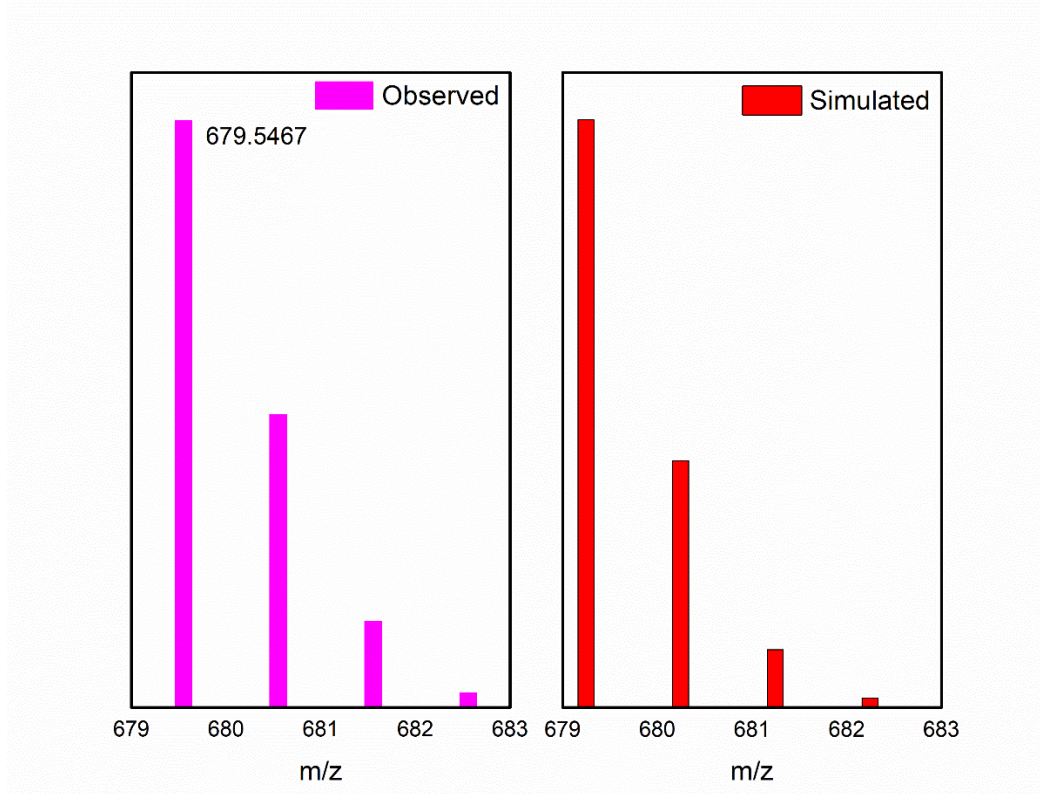

**Figure S44:** HRMS(ESI) expanded spectra of m/z 679.5467 (a) Observed (b) Simulated.

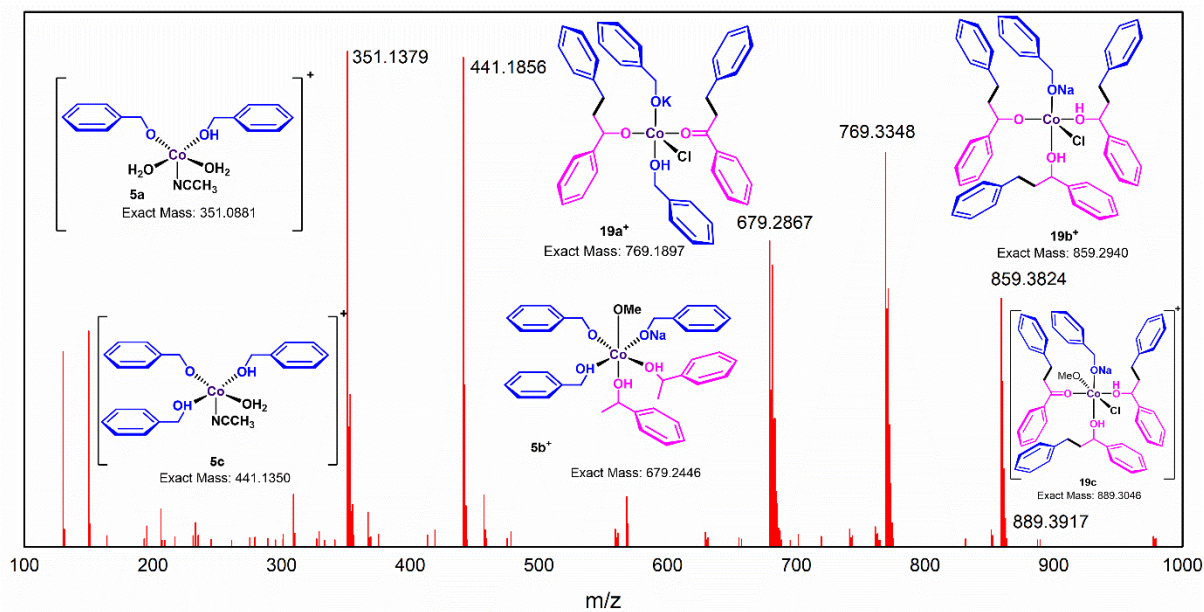

**Figure S45:** HRMS(ESI) spectra of  $\beta$ -alkylation of **1** with **2** catalyzed by  $\text{CoCl}_2$  (0.1 mol %) and  $\text{NaOtBu}$  (2.5 mol %) at  $t = 1$  h at  $140^\circ\text{C}$ .

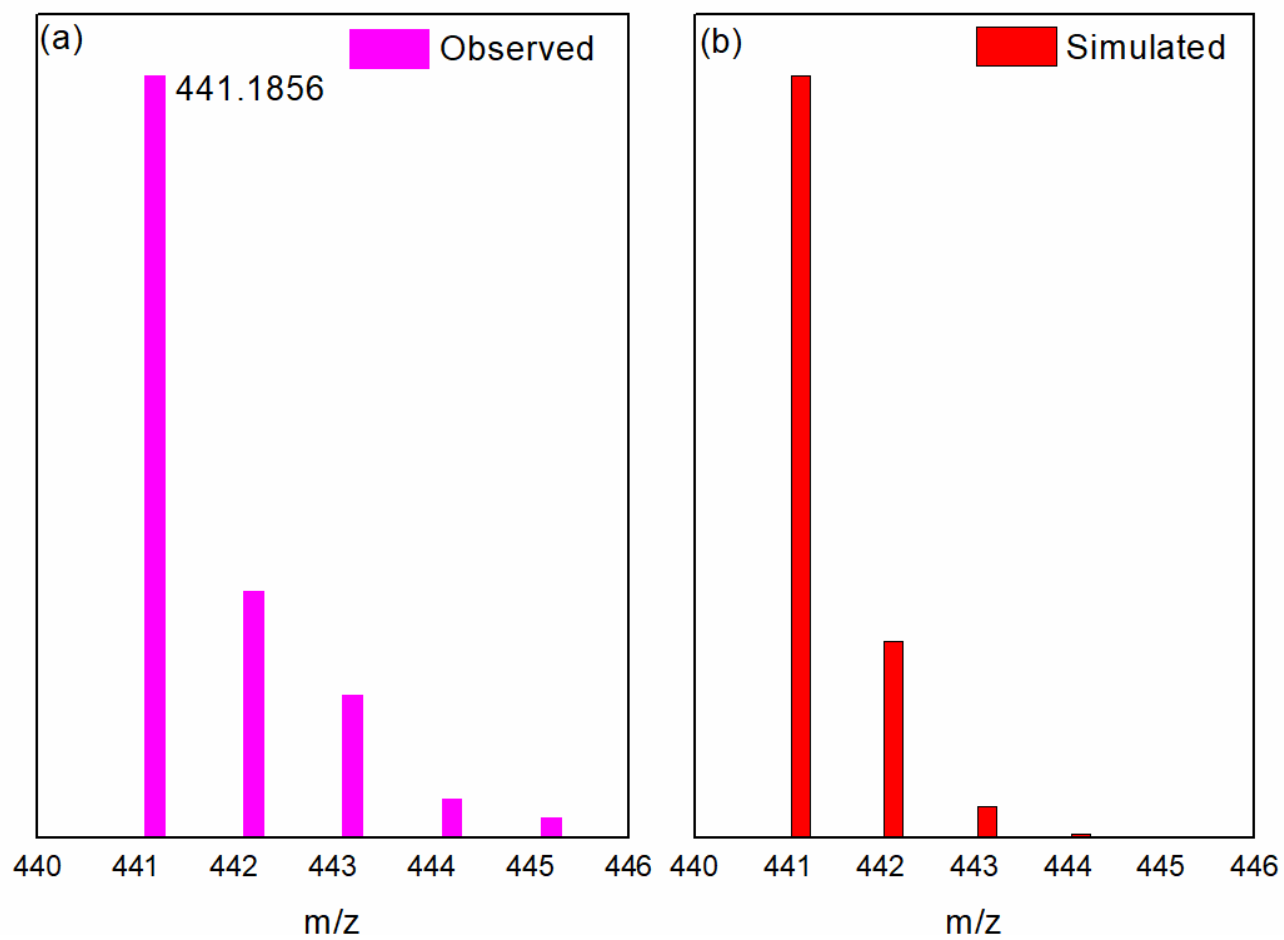

**Figure S46:** HRMS(ESI) expanded spectra of  $m/z$  441.1856 (a) Observed (b) Simulated.

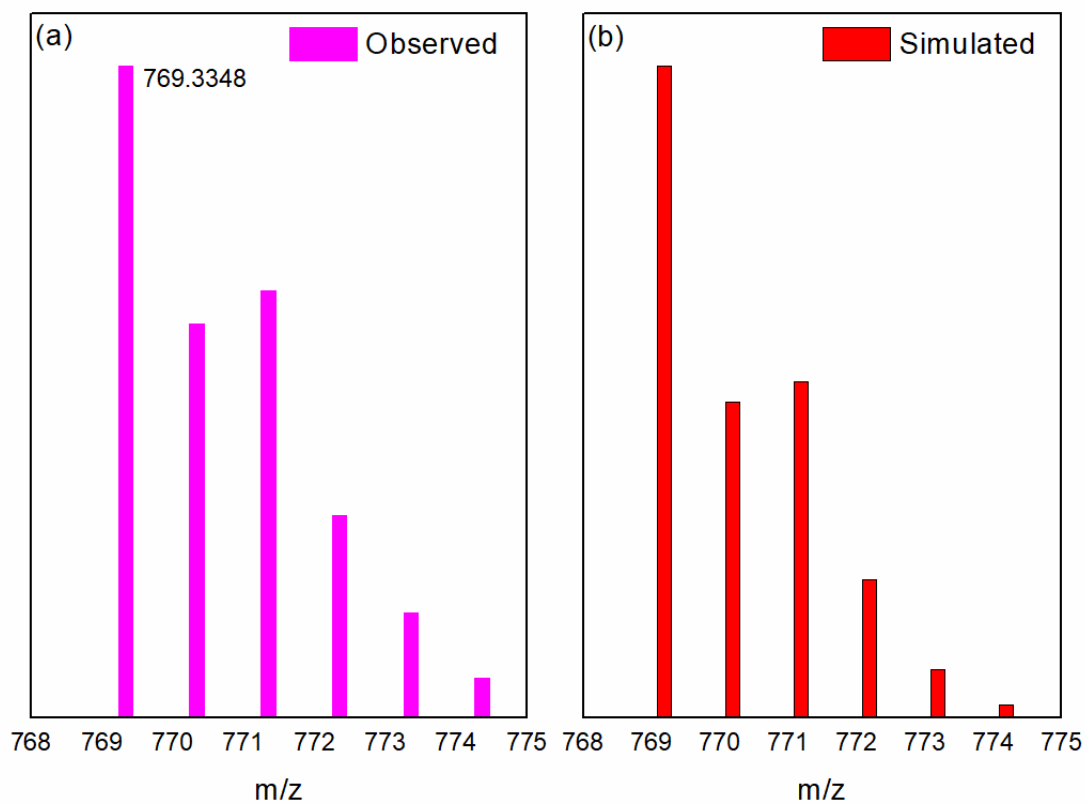

**Figure S47:** HRMS(ESI) expanded spectra of m/z 769.3348 (a) Observed (b) Simulated.

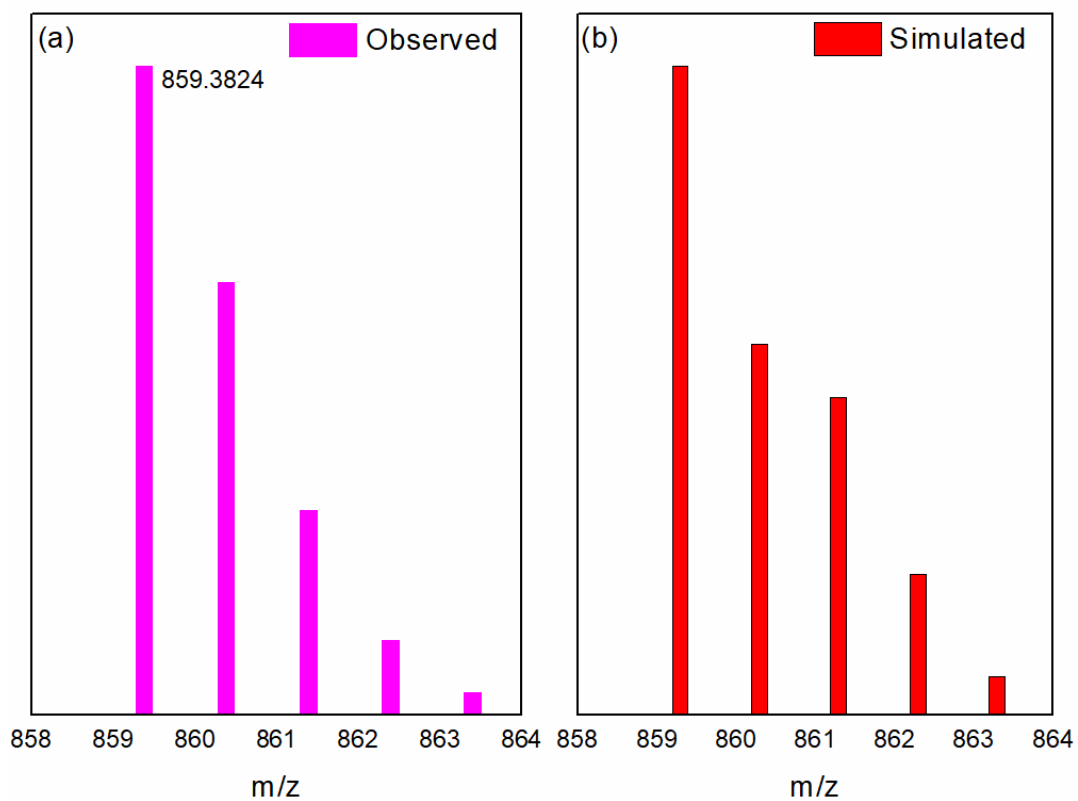

**Figure S48:** HRMS(ESI) expanded spectra of m/z 859.3824 (a) Observed (b) Simulated.



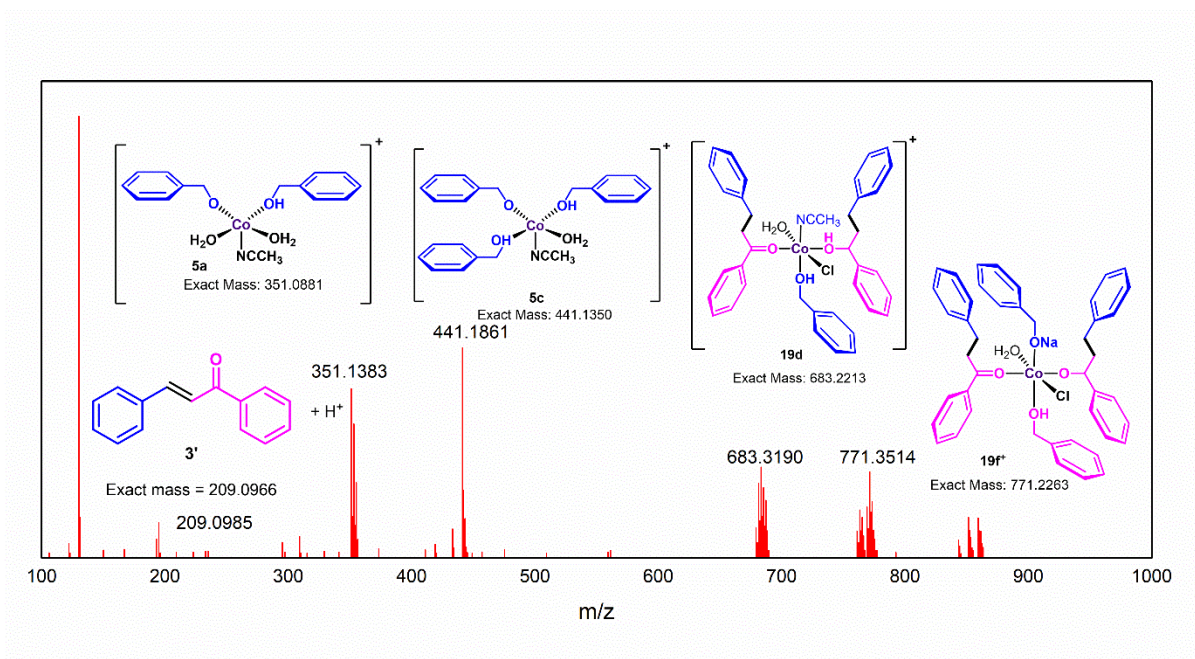

**Figure S49:** HRMS(ESI) spectra of  $\beta$ -alkylation of **1** with **2** catalyzed by  $CoCl_2$  (0.1 mol %) and  $NaOtBu$  (2.5 mol %) at  $t = 5$  h at  $140^\circ C$

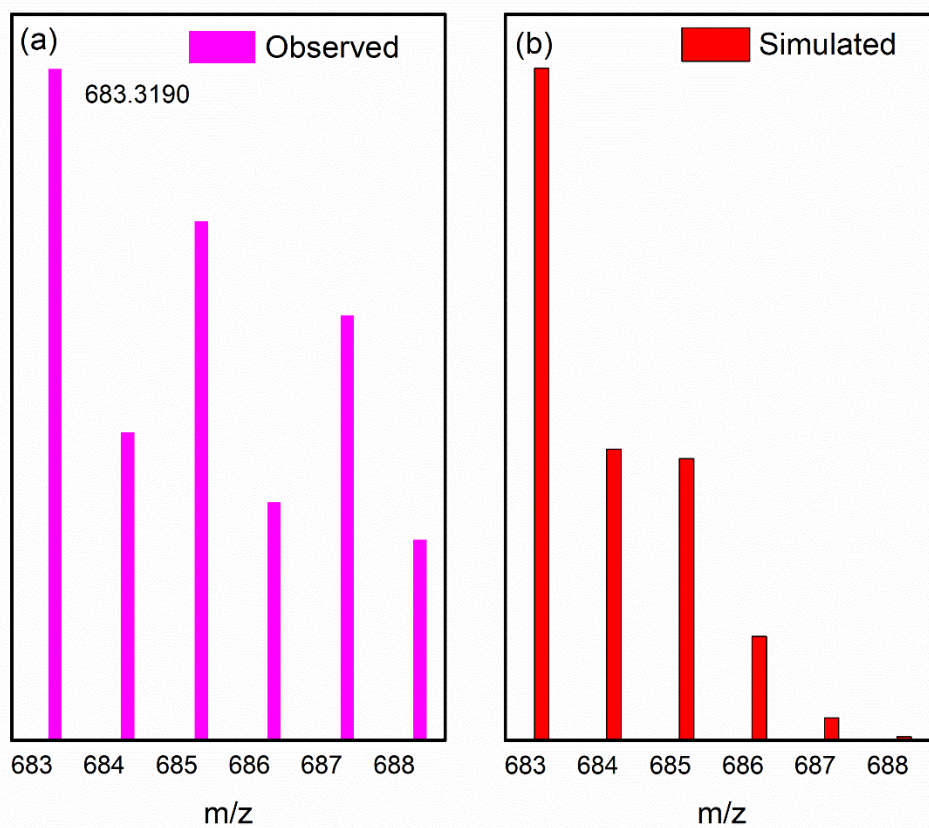

**Figure S50:** HRMS(ESI) expanded spectra of  $m/z$  683.3190 (a) Observed (b) Simulated.

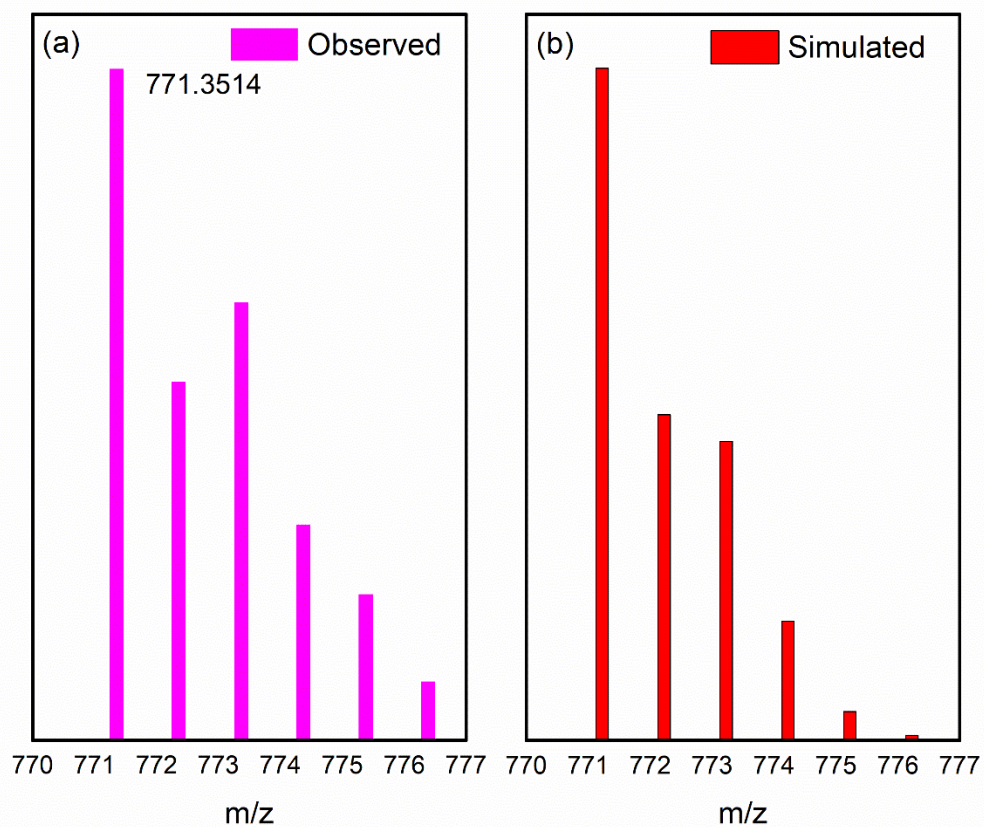

**Figure S51:** HRMS(ESI) expanded spectra of m/z 771.3514 (a) Observed (b) Simulated.

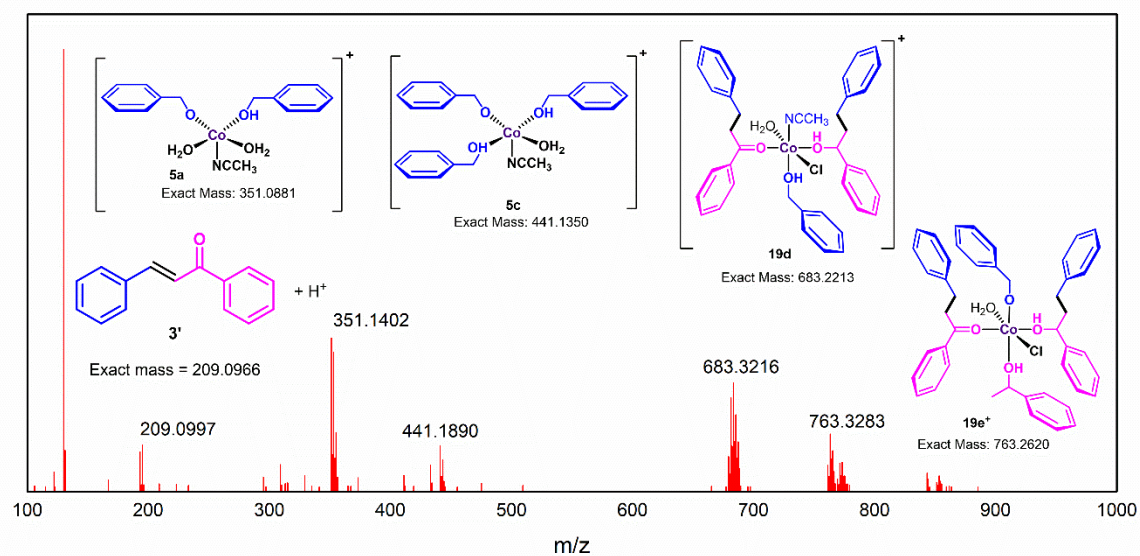

**Figure S52:** HRMS(ESI) spectra of  $\beta$ -alkylation of **1** with **2** catalyzed by  $\text{CoCl}_2$  (0.1 mol %) and  $\text{NaOBu}$  (2.5 mol %) at  $t = 10$  h at  $140^\circ\text{C}$ .



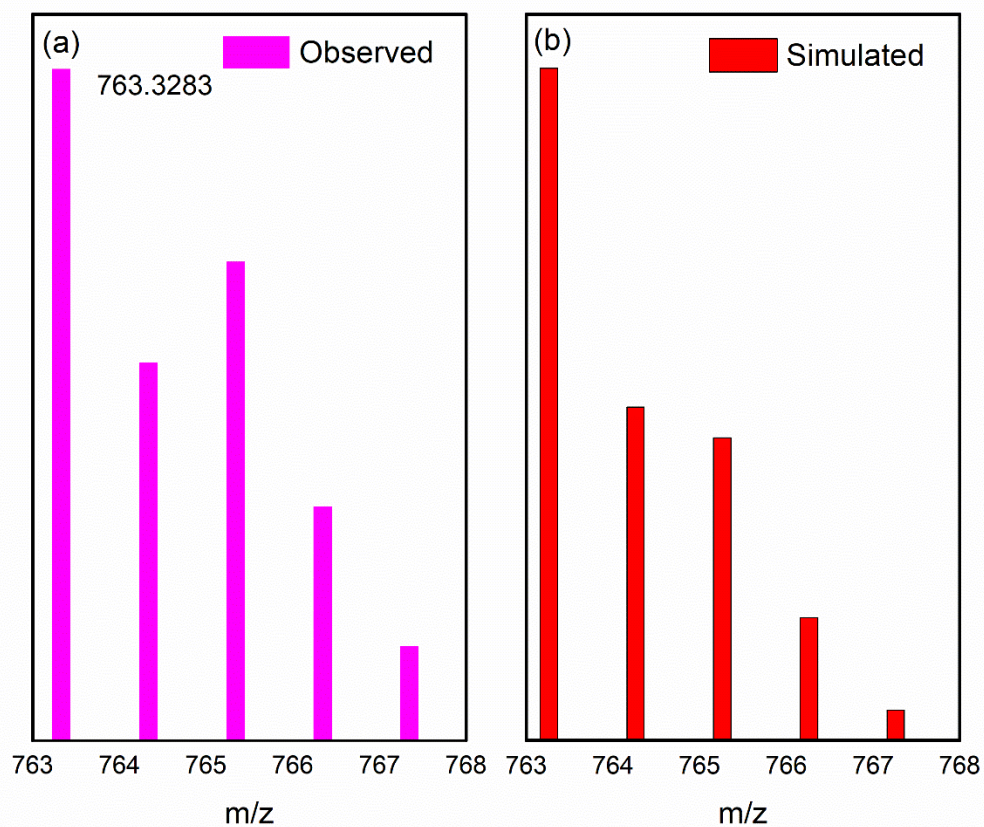

**Figure S53:** HRMS(ESI) expanded spectra of m/z 763.3283 (a) Observed (b) Simulated.

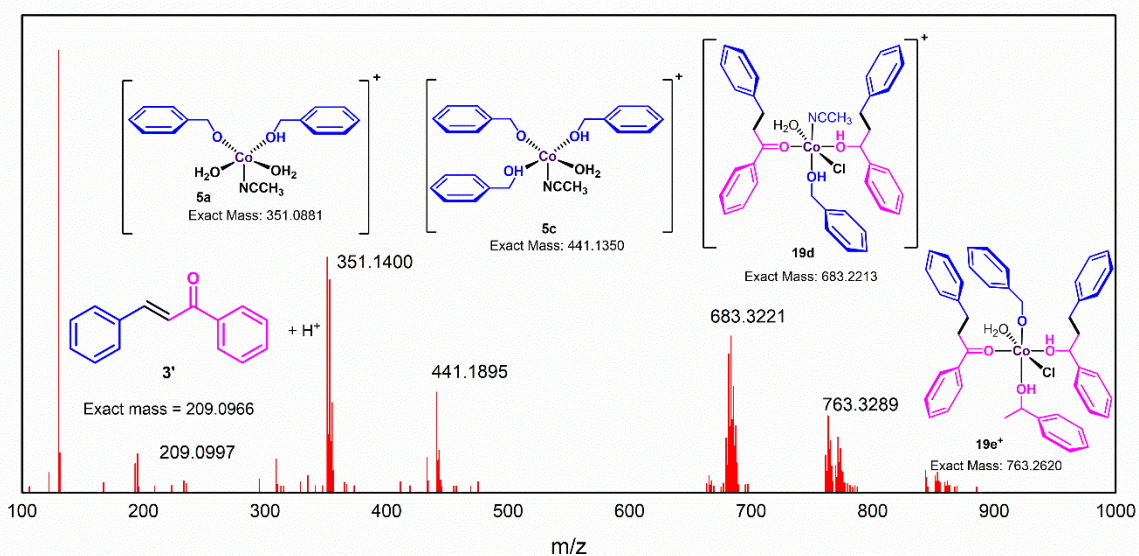

**Figure S54:** HRMS(ESI) spectra of  $\beta$ -alkylation of **1** with **2** catalyzed by  $\text{CoCl}_2$  (0.1 mol %) and  $\text{NaO}^t\text{Bu}$  (2.5 mol %) at  $t = 24$  h at  $140^\circ\text{C}$ .

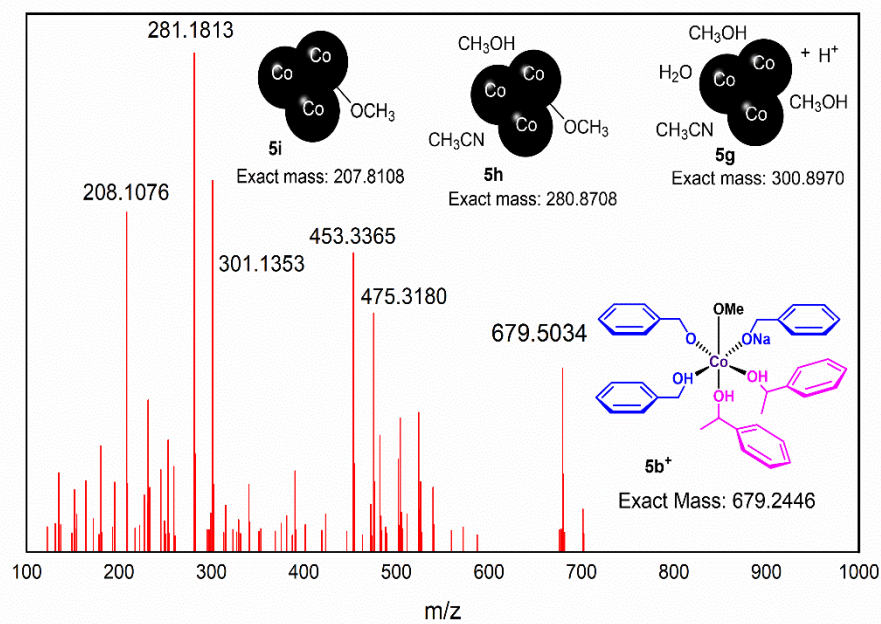

**Figure S55:** HRMS(ESI) spectra of  $\beta$ -alkylation of **1** with **2** catalyzed by  $\text{CoCl}_2$  (1 mol %) and  $\text{NaO}^t\text{Bu}$  (2.5 mol %) at  $t = 0$  h at  $140^\circ\text{C}$ .

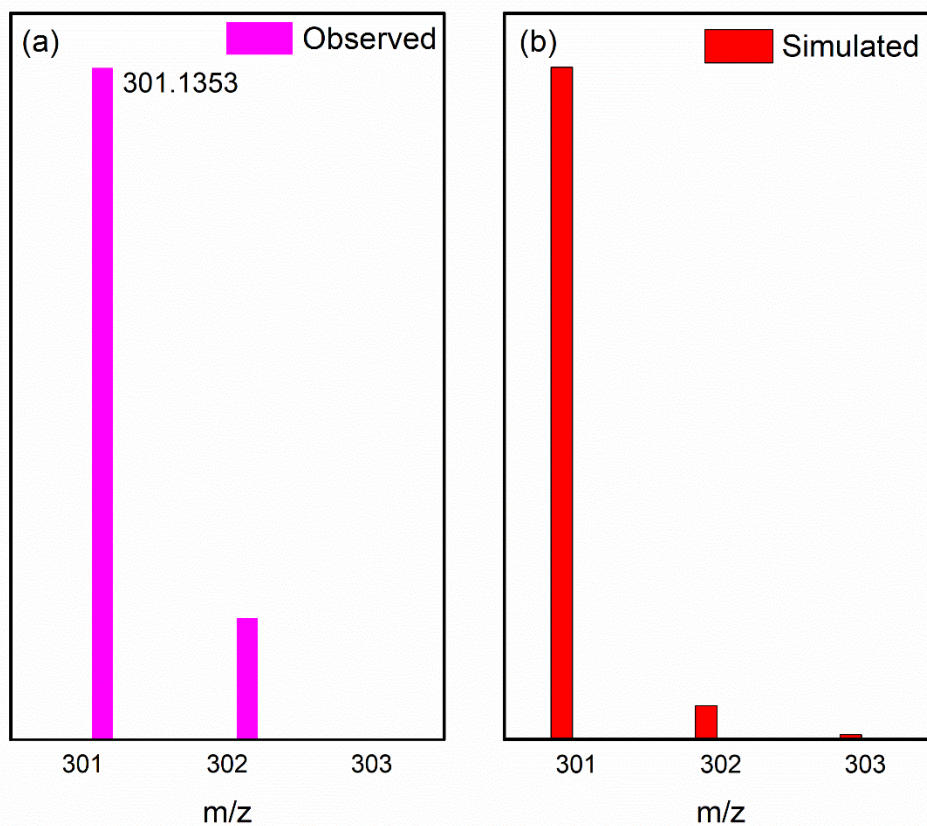

**Figure S56:** HRMS(ESI) expanded spectra of  $m/z$  301.1353 (a) Observed (b) Simulated



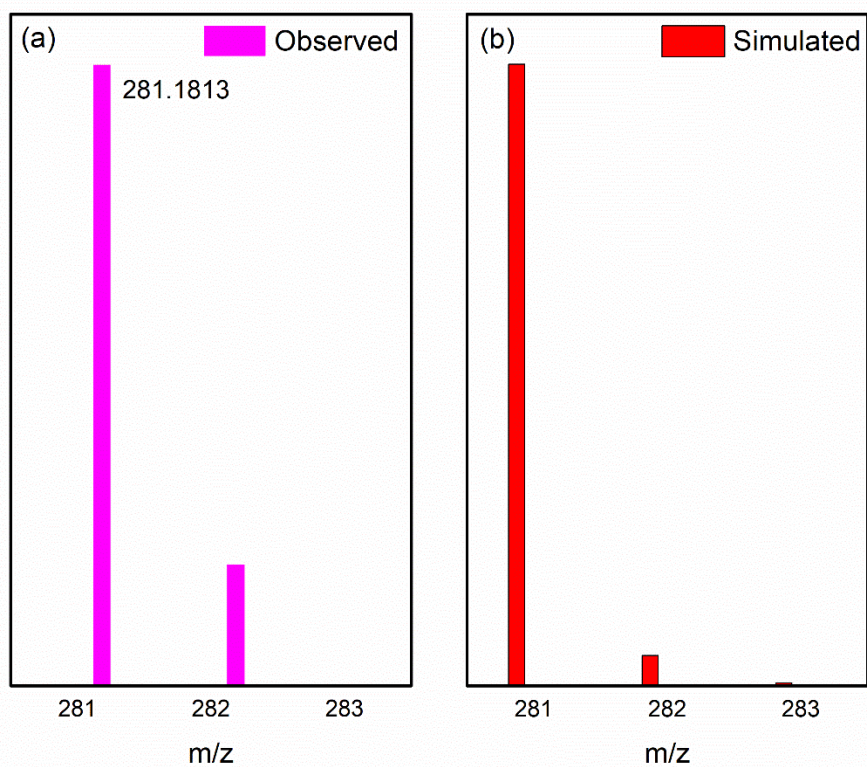

**Figure S57:** HRMS(ESI) expanded spectra of m/z 281.1813 (a) Observed (b) Simulated

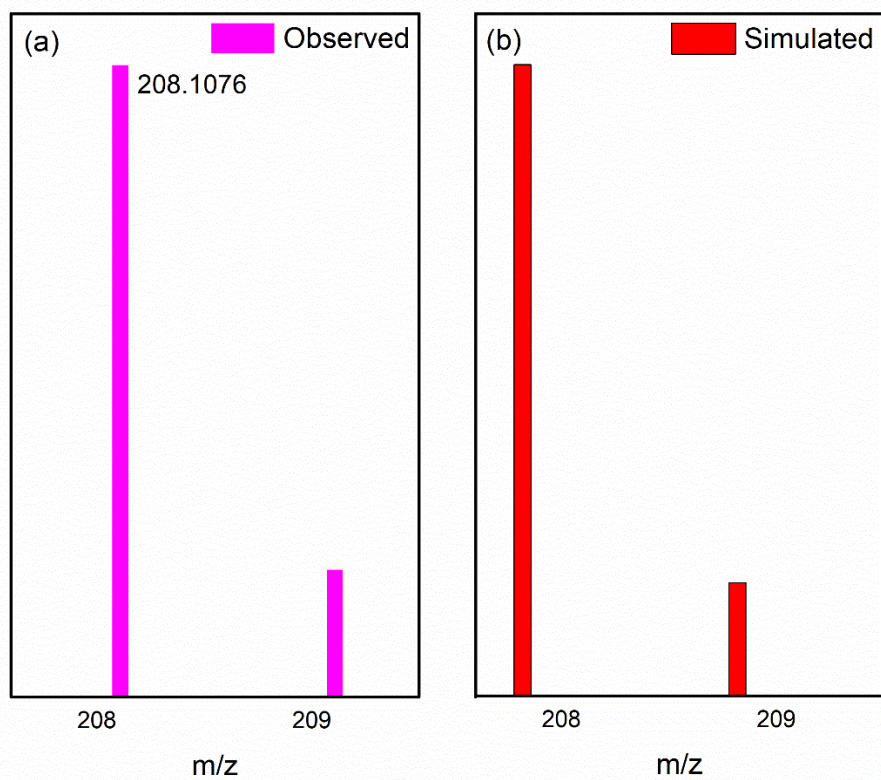

**Figure S58:** HRMS(ESI) expanded spectra of m/z 208.1076 (a) Observed (b) Simulated

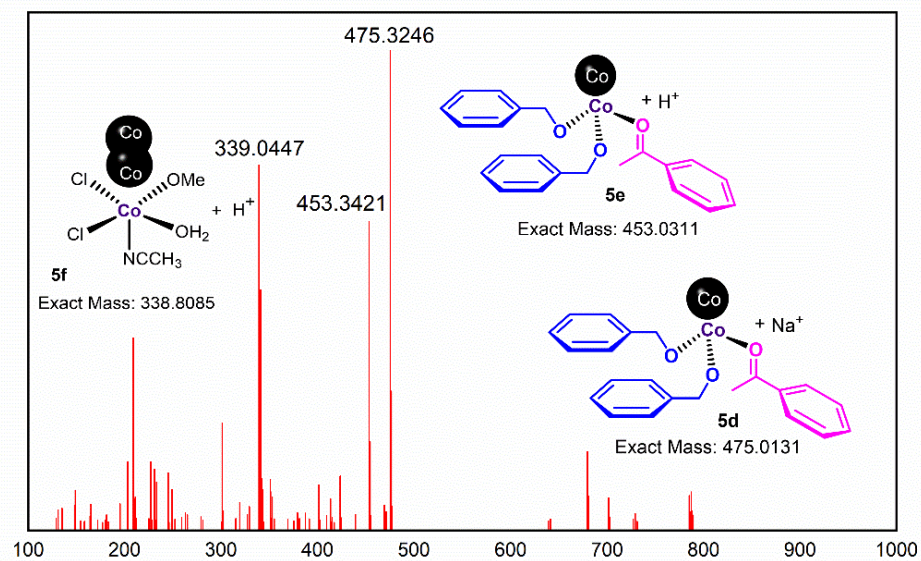

**Figure S59:** HRMS(ESI) spectra of  $\beta$ -alkylation of **1** with **2** catalyzed by  $\text{CoCl}_2$  (1 mol %) and  $\text{NaO}^t\text{Bu}$  (2.5 mol %) at  $t = 1$  h at  $140^\circ\text{C}$ .

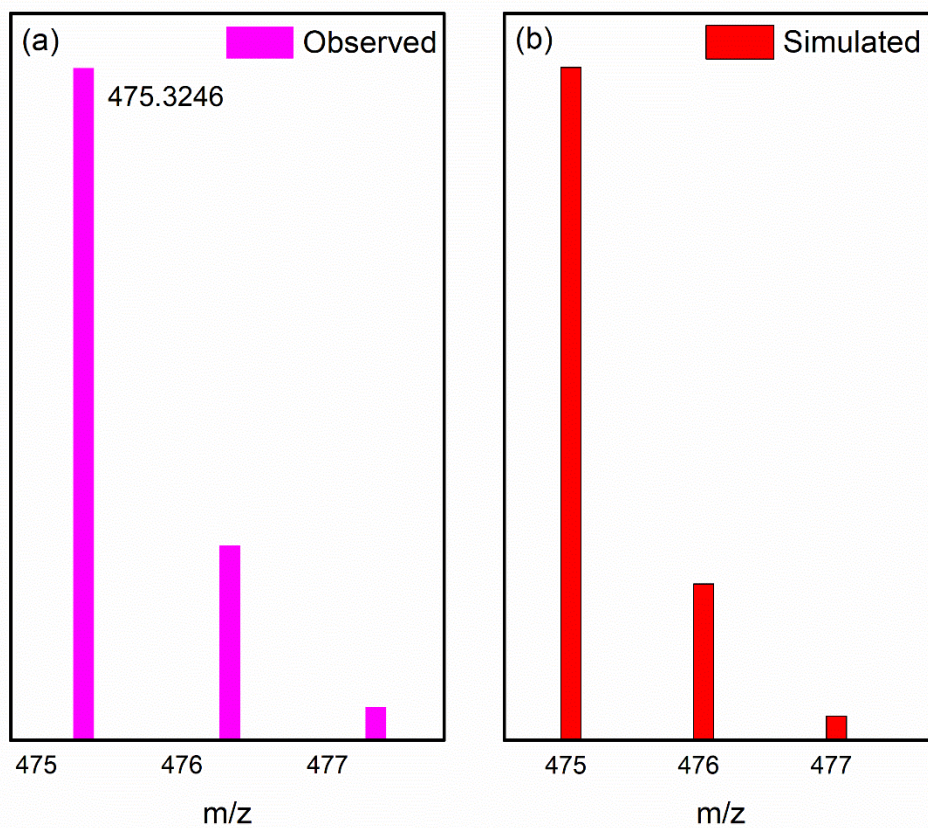

**Figure S60:** HRMS(ESI) expanded spectra of  $m/z$  475.3246 (a) Observed (b) Simulated



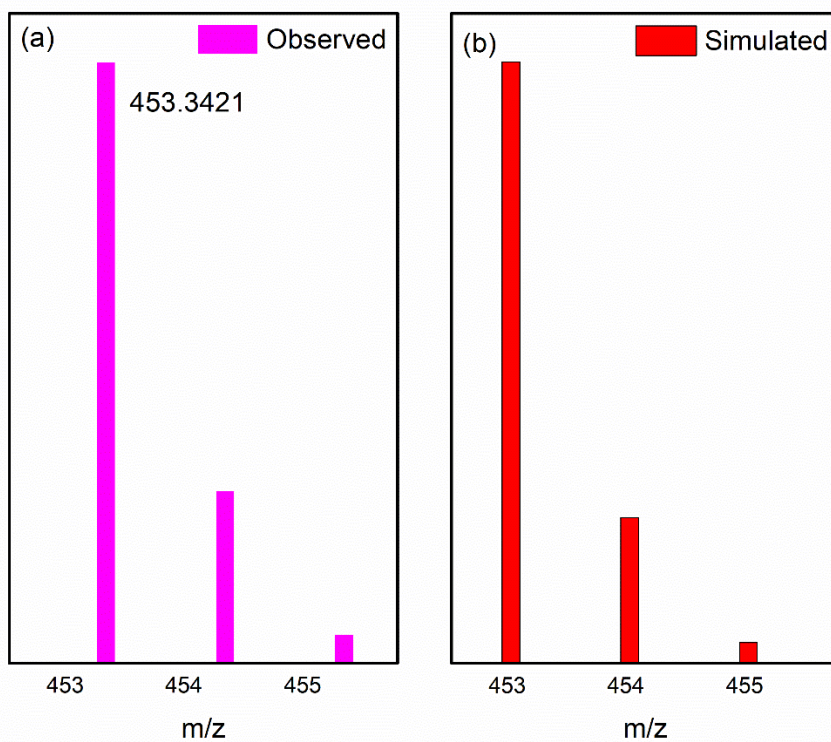

**Figure S61:** HRMS(ESI) expanded spectra of m/z 453.3421 (a) Observed (b) Simulated

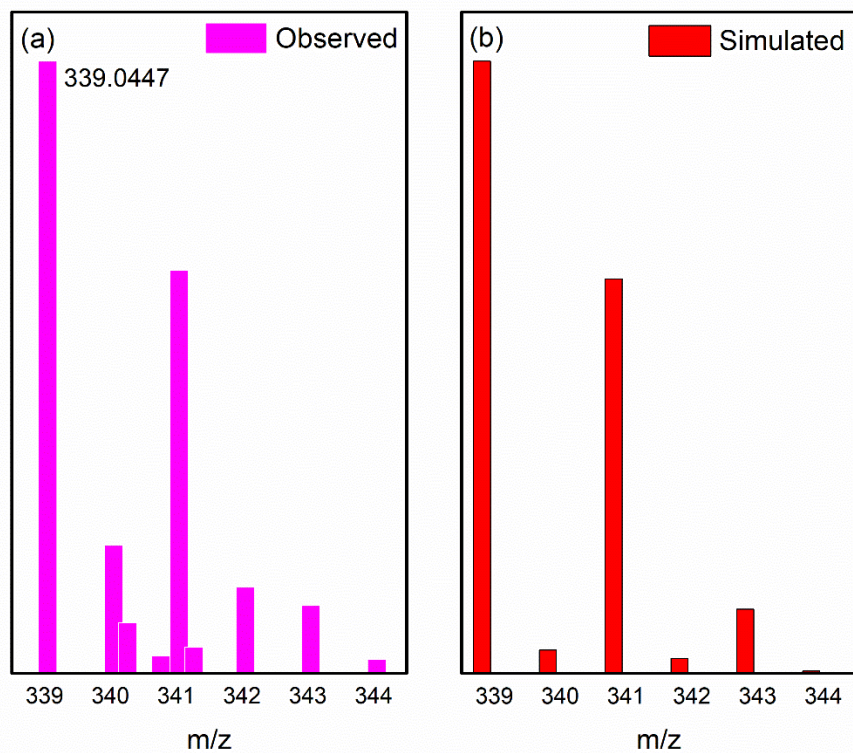

**Figure S62:** HRMS(ESI) expanded spectra of m/z 339.0447 (a) Observed (b) Simulated

## 5. EPR Analysis

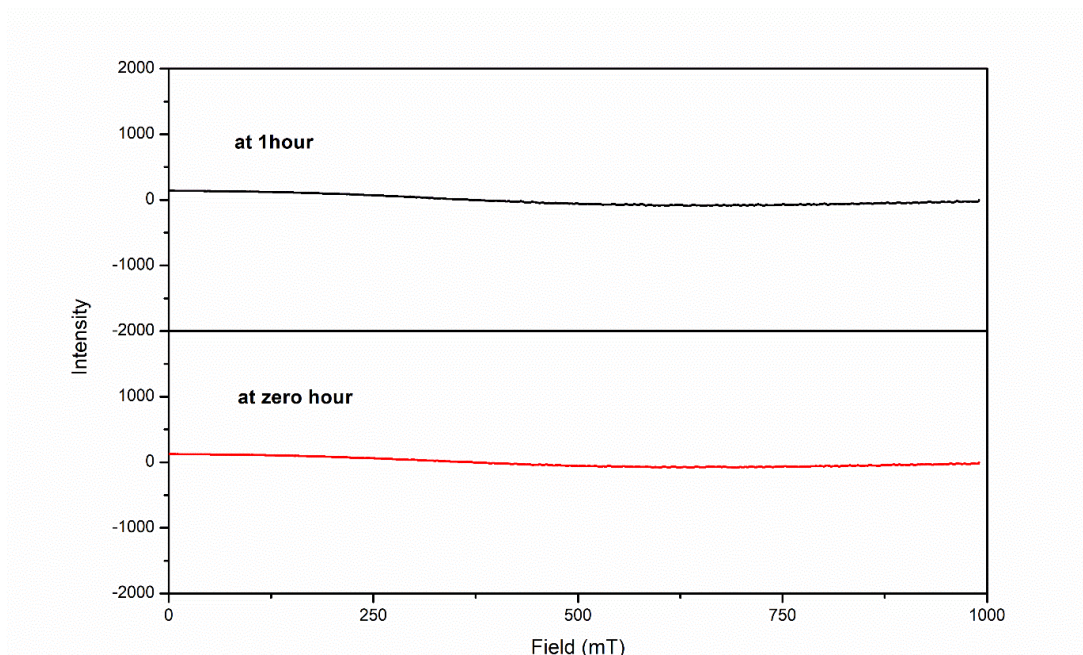

**Figure S63:** X band EPR spectrum at 77K of the aliquot withdrawn from the  $\beta$ -alkylation of **1** with **2** catalyzed by  $\text{CoCl}_2$  (0.1 mol %) after 0 h and 1 h

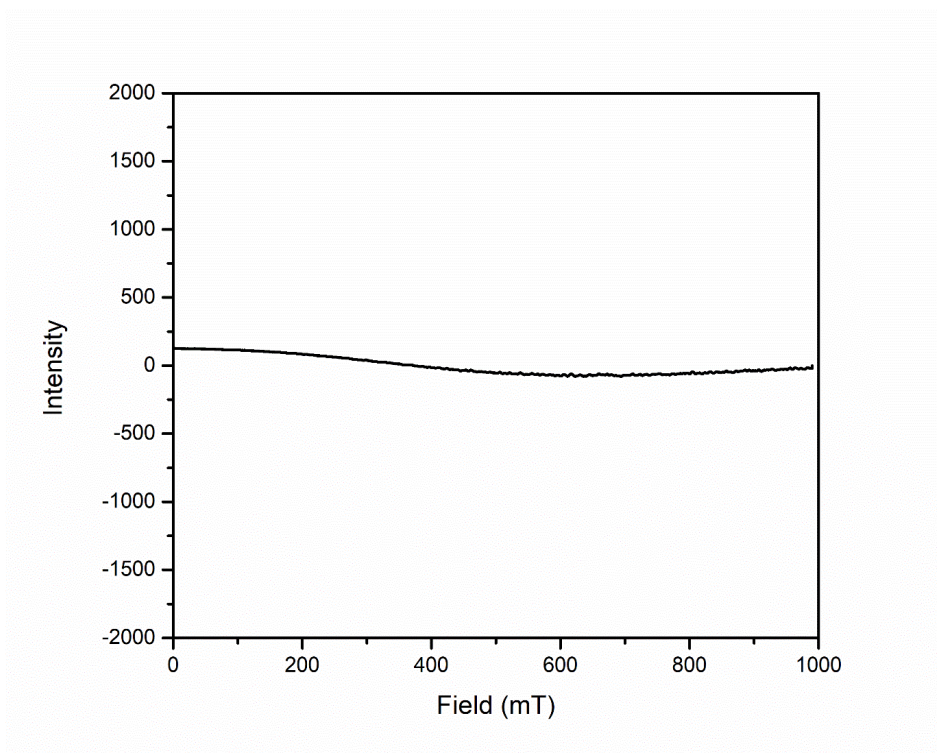

**Figure S64:** X band EPR spectrum at 77K of the aliquot withdrawn from the  $\beta$ -alkylation of **1** with **2** catalyzed by  $\text{CoCl}_2$  (0.1 mol %) after 0 h



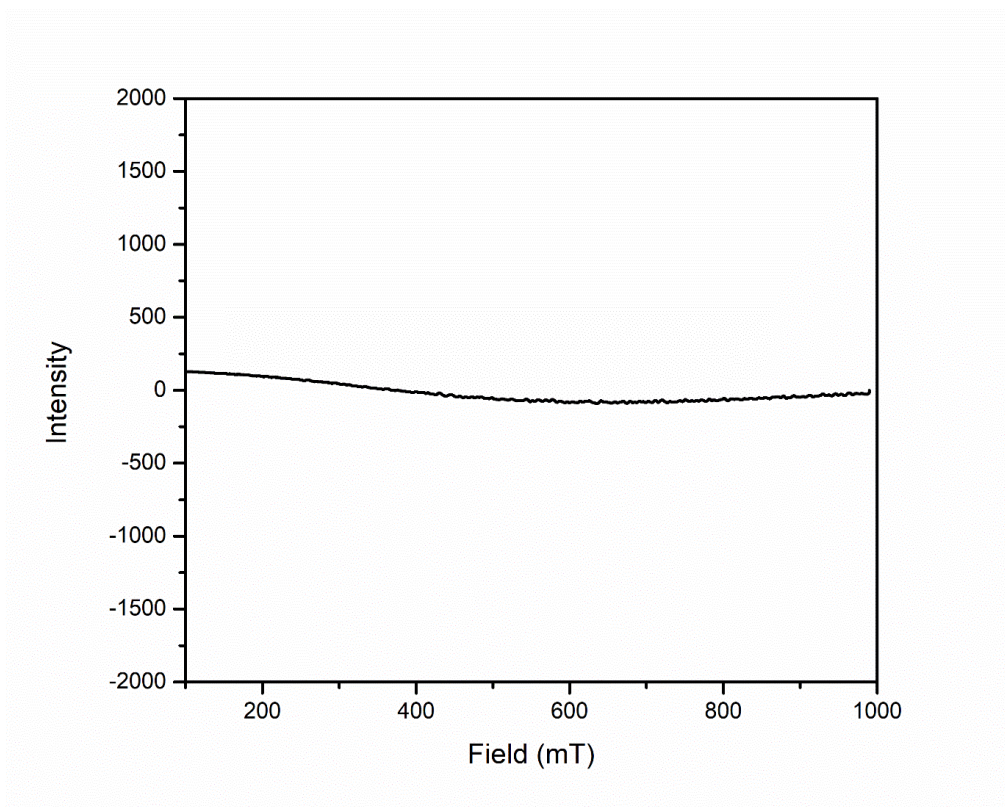

**Figure S65:** X band EPR spectrum at 77K of the aliquot withdrawn from the  $\beta$ -alkylation of **1** with **2** catalyzed by  $\text{CoCl}_2$  (0.1 mol %) after 1h

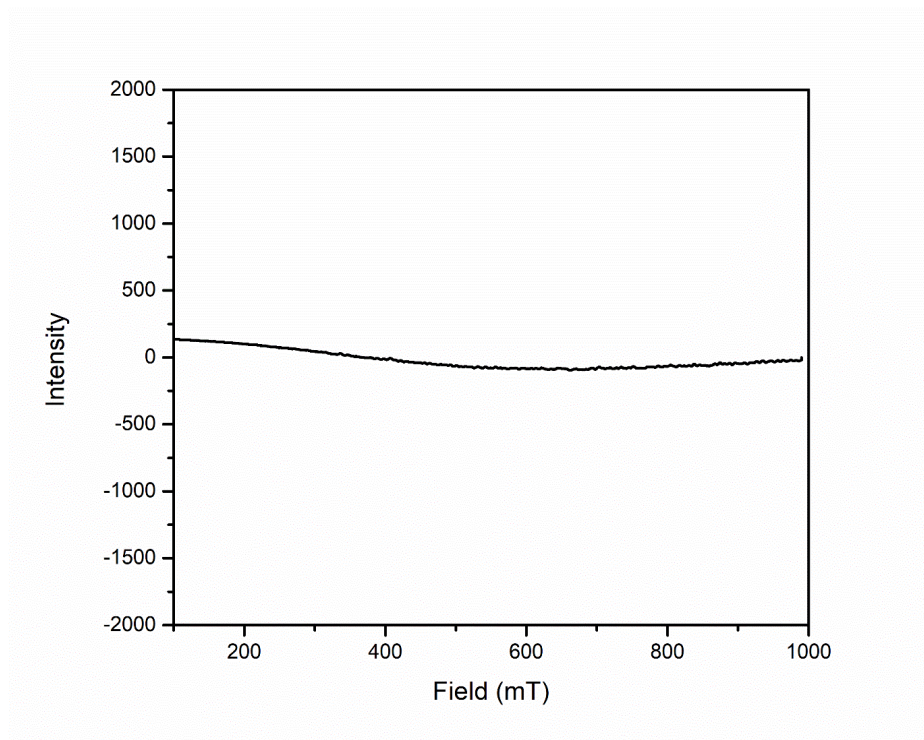

**Figure S66:** X band EPR spectrum at 77K of the aliquot withdrawn from the  $\beta$ -alkylation of **1** with **2** catalyzed by  $\text{CoCl}_2$  (0.1 mol %) after 5h

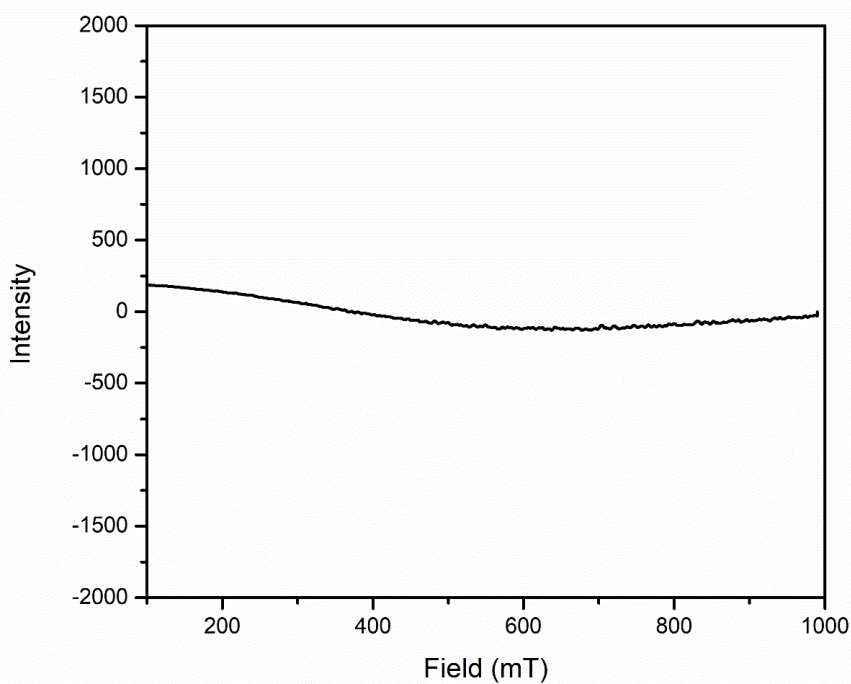

**Figure S67:** X band EPR spectrum at 77K of the aliquot withdrawn from the  $\beta$ -alkylation of **1** with **2** catalyzed by  $\text{CoCl}_2$  (0.1 mol %) after 10h

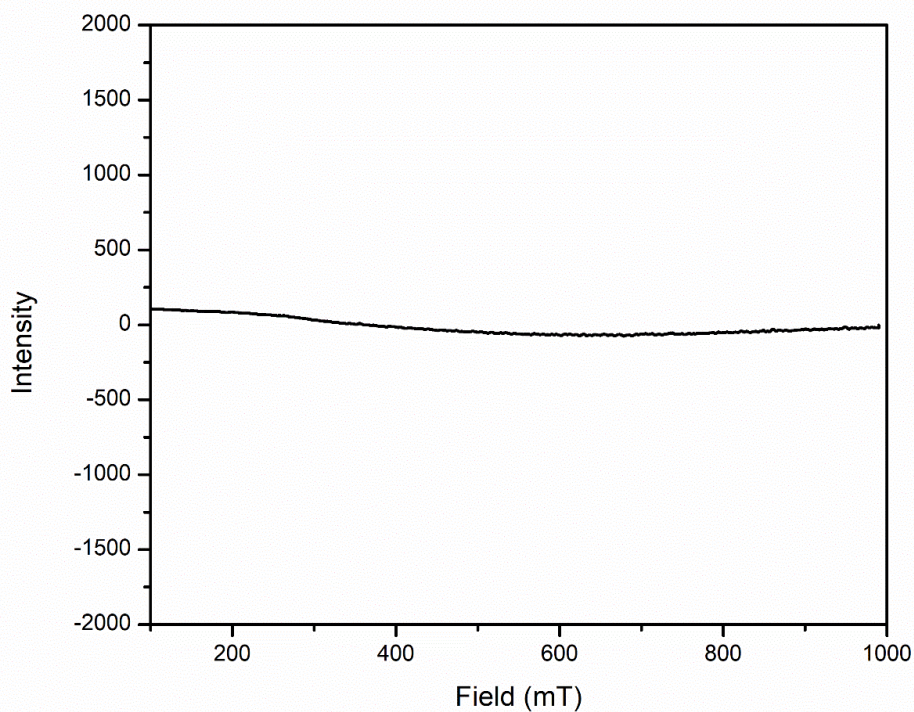

**Figure S68:** X band EPR spectrum at 77K of the aliquot withdrawn from the  $\beta$ -alkylation of **1** with **2** catalyzed by  $\text{CoCl}_2$  (0.1 mol %) after 24 h

## 6. Gas Chromatography Analysis

GC analysis (TCD detection) was performed on a Agilent 7820-GC instrument fitted with Agilent Front SSZ Inlet N<sub>2</sub> HP-PLOT Q column (30 m length x 530 μm x 40 μm) using the following method:

Agilent 7820-GC back detector TCD

Oven temperature: 50 °C

Inlet temperature: 100 °C

Detector temperature (TCD): 250 °C

Detector temperature (FID): 300 °C

Time at starting temp: 0 min

Hold time = 10 min

Flow rate (carrier): 25 mL/min (N<sub>2</sub>)

Split flow: 50 mL/min

Split ratio: 10

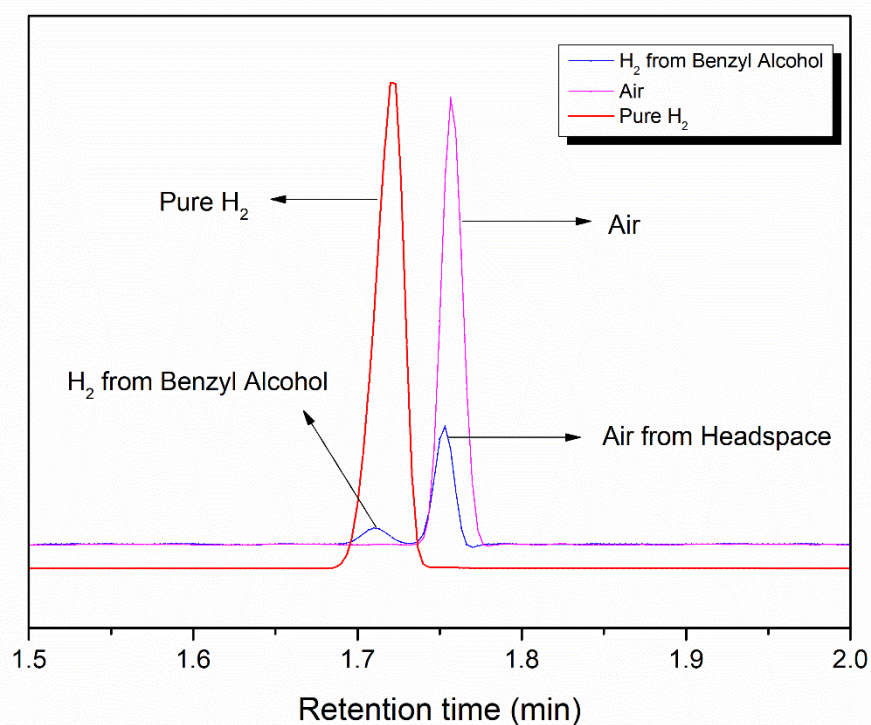

**Figure S69a:** Evidence for H<sub>2</sub> evolution in the dehydrogenation of benzyl alcohol (**1**) catalyzed by CoCl<sub>2</sub> (0.01 mol %) at 140 °C via GC analysis.



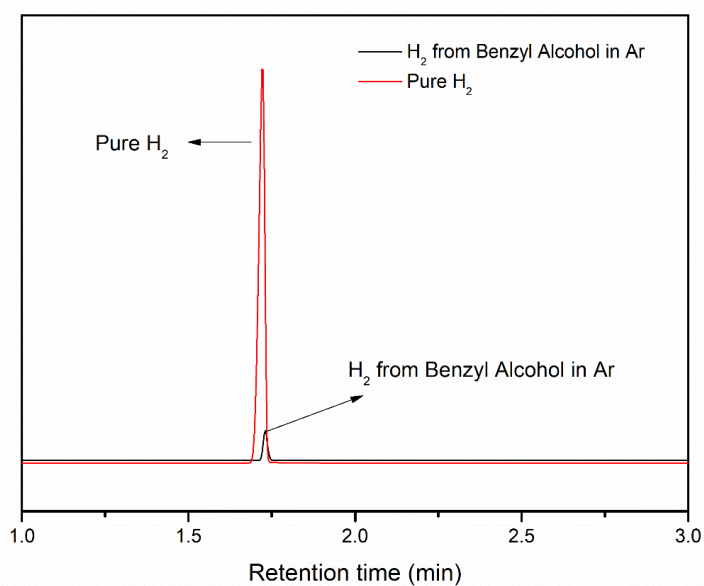

**Figure S69b:** Evidence for H<sub>2</sub> evolution in the dehydrogenation of benzyl alcohol (**1**) in presence of argon catalyzed by CoCl<sub>2</sub> (0.01 mol %) at 140 °C via GC analysis.

## 7. Kinetic Studies

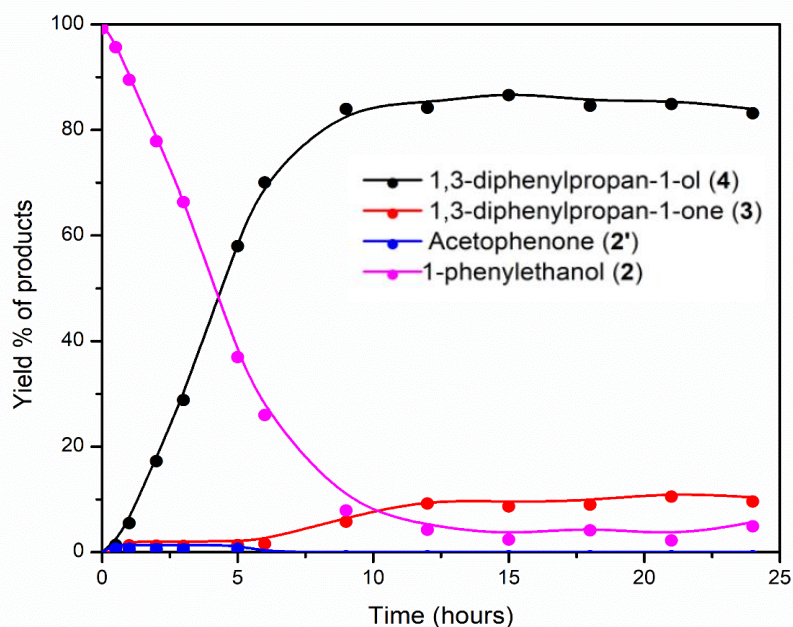

**Figure S70:** Time-profile of the  $\beta$ -alkylation of Benzyl Alcohol with 1-Phenyl Ethanol. Reaction condition: 5 mmol of **1**, 5 mmol of **2**, 0.01 mol% CoCl<sub>2</sub>, 2.5 mol% NaO<sup>t</sup>Bu at 140 °C



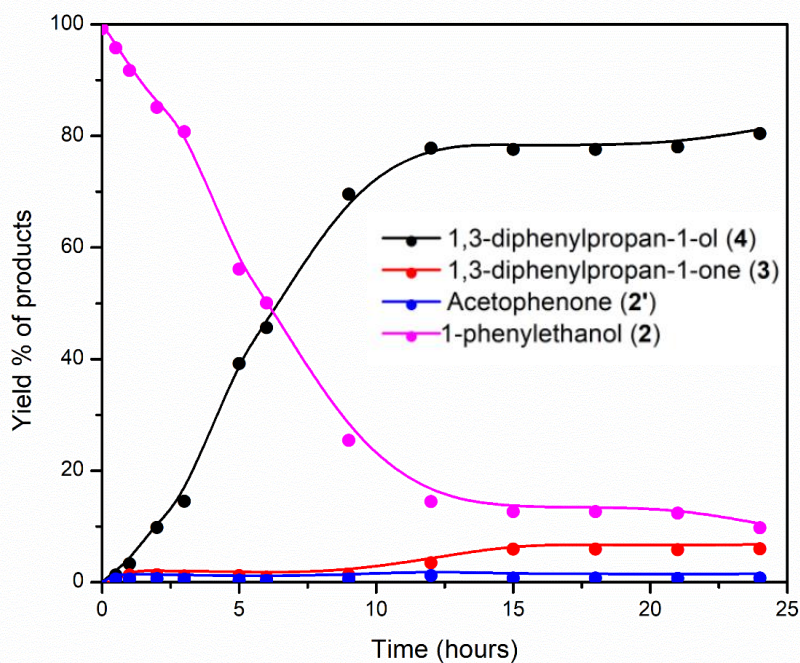

**Figure S71:** Time-profile of the  $\beta$ -alkylation of Benzyl Alcohol with 1-Phenyl Ethanol. Reaction condition: 5 mmol of **1**, 5 mmol of **2**, 0.005 mol% CoCl<sub>2</sub>, 2.5 mol% NaO<sup>t</sup>Bu at 140 °C

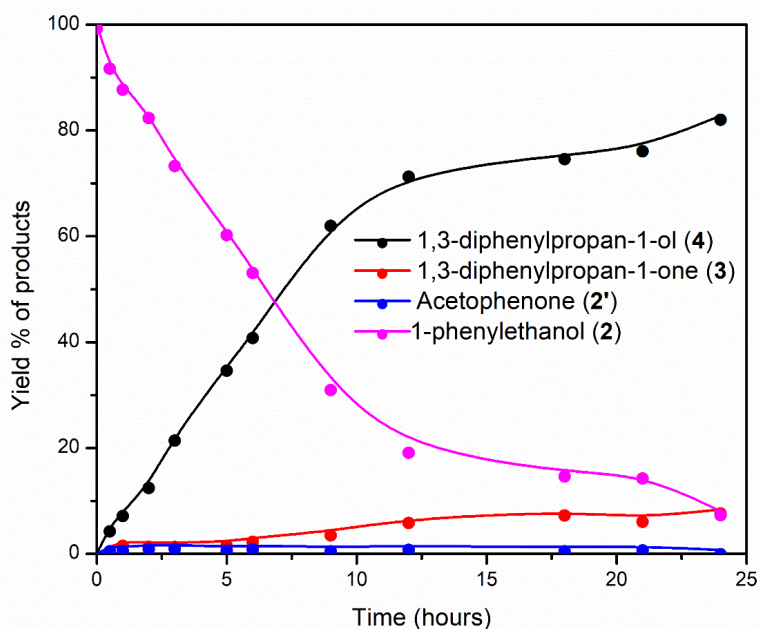

**Figure S72:** Time-profile of the  $\beta$ -alkylation of Benzyl Alcohol with 1-Phenyl Ethanol. Reaction condition: 5 mmol of **1**, 5 mmol of **2**, 0.025 mol% CoCl<sub>2</sub>, 2.5 mol% NaO<sup>t</sup>Bu at 140 °C

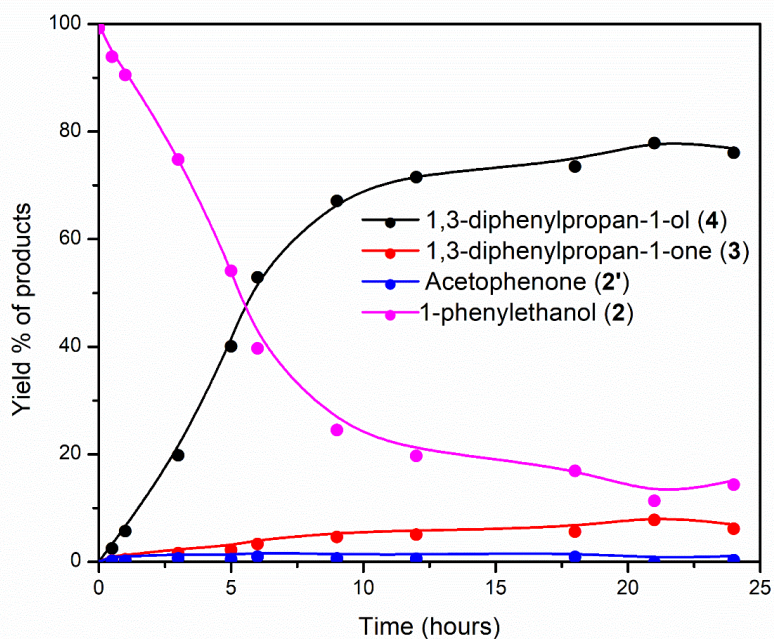

**Figure S73:** Time-profile of the  $\beta$ -alkylation of Benzyl Alcohol with 1-Phenyl Ethanol. Reaction condition: 5 mmol of **1**, 5 mmol of **2**, 0.05 mol%  $\text{CoCl}_2$ , 2.5 mol%  $\text{NaO}^t\text{Bu}$  at 140 °C

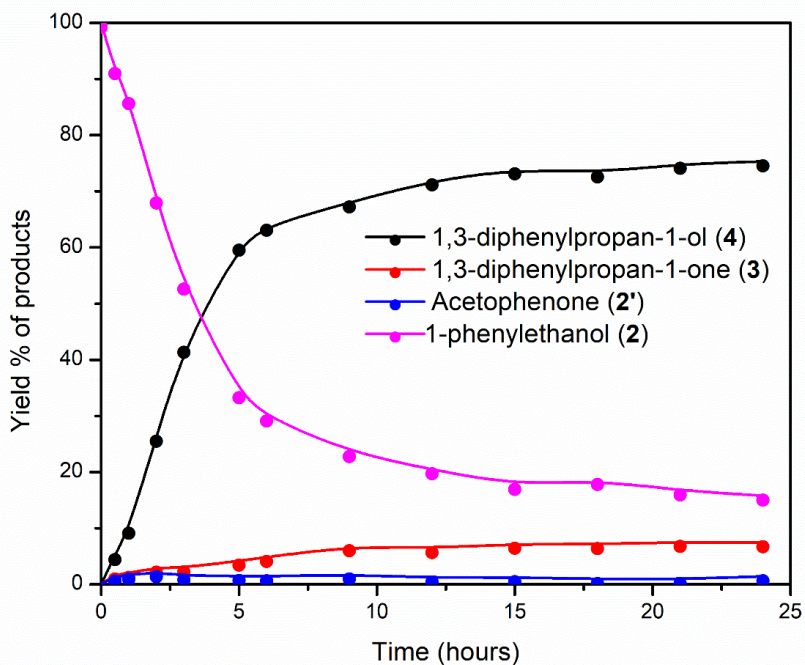

**Figure S74:** Time-profile of the  $\beta$ -alkylation of Benzyl Alcohol with 1-Phenyl Ethanol. Reaction condition: 5 mmol of **1**, 5 mmol of **2**, 0.075 mol%  $\text{CoCl}_2$ , 2.5 mol%  $\text{NaO}^t\text{Bu}$  at 140 °C



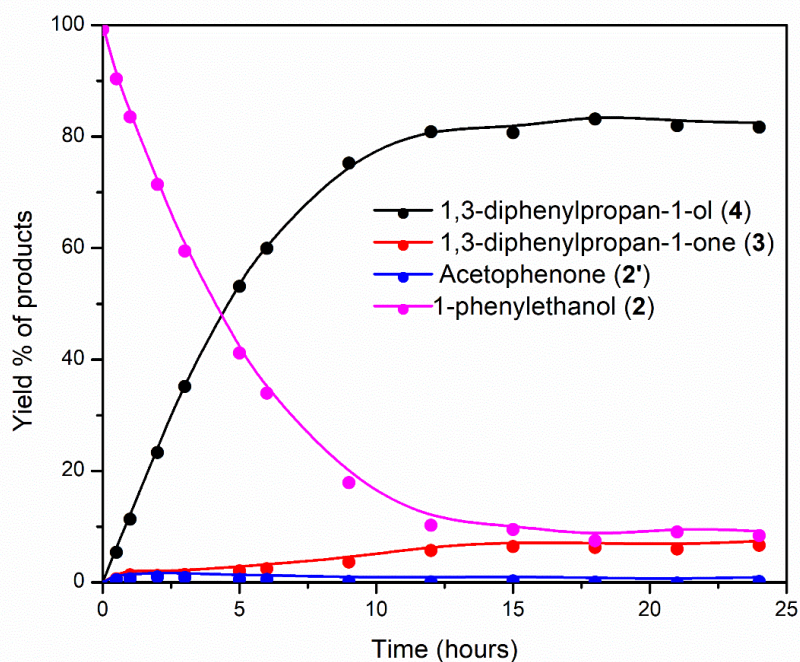

**Figure S75:** Time-profile of the  $\beta$ -alkylation of Benzyl Alcohol with 1-Phenyl Ethanol. Reaction condition: 5 mmol of **1**, 5 mmol of **2**, 0.1 mol% CoCl<sub>2</sub>, 2.5 mol% NaO<sup>t</sup>Bu at 140 °C

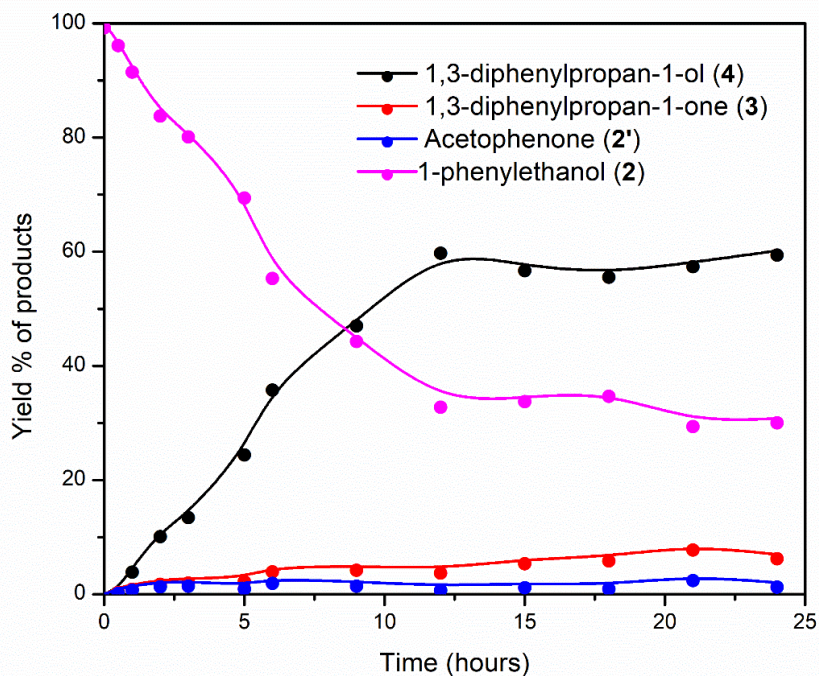

**Figure S75a:** Time-profile of the  $\beta$ -alkylation of Benzyl Alcohol with 1-Phenyl Ethanol. Reaction condition: 5 mmol of **1**, 5 mmol of **2**, 0.0025 mol% CoCl<sub>2</sub>, 2.5 mol% NaO<sup>t</sup>Bu at 140 °C

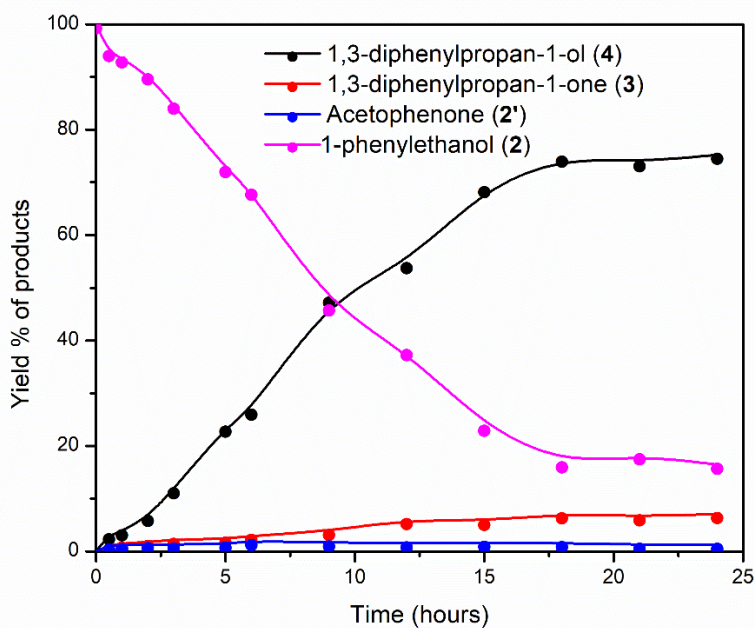

**Figure S75b:** Time-profile of the  $\beta$ -alkylation of Benzyl Alcohol with 1-Phenyl Ethanol. Reaction condition: 5 mmol of **1**, 5 mmol of **2**, 0.01375 mol% CoCl<sub>2</sub>, 2.5 mol% NaO<sup>t</sup>Bu at 140 °C

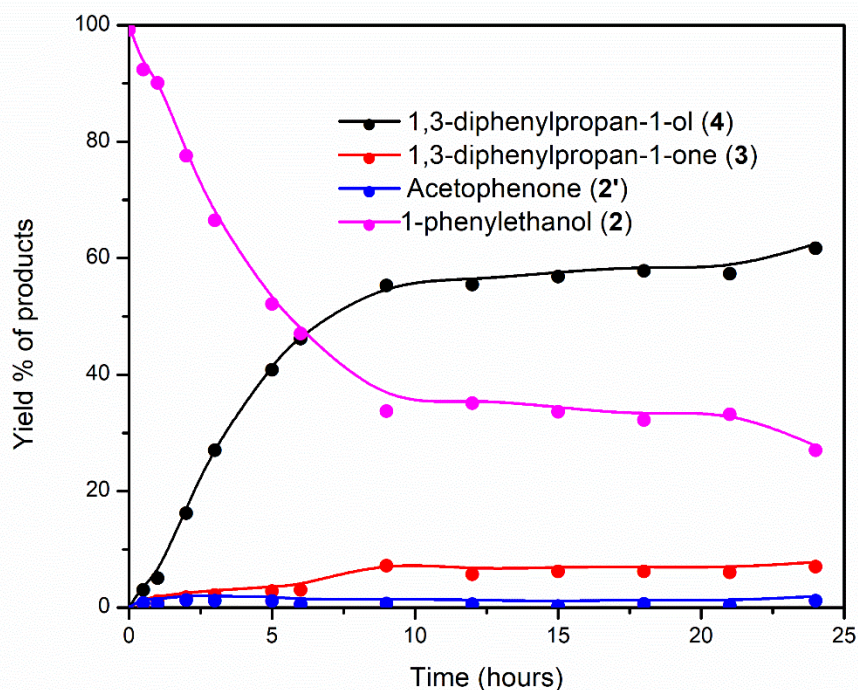

**Figure S75c:** Time-profile of the  $\beta$ -alkylation of Benzyl Alcohol with 1-Phenyl Ethanol. Reaction condition: 5 mmol of **1**, 5 mmol of **2**, 0.0175 mol% CoCl<sub>2</sub>, 2.5 mol% NaO<sup>t</sup>Bu at 140 °C



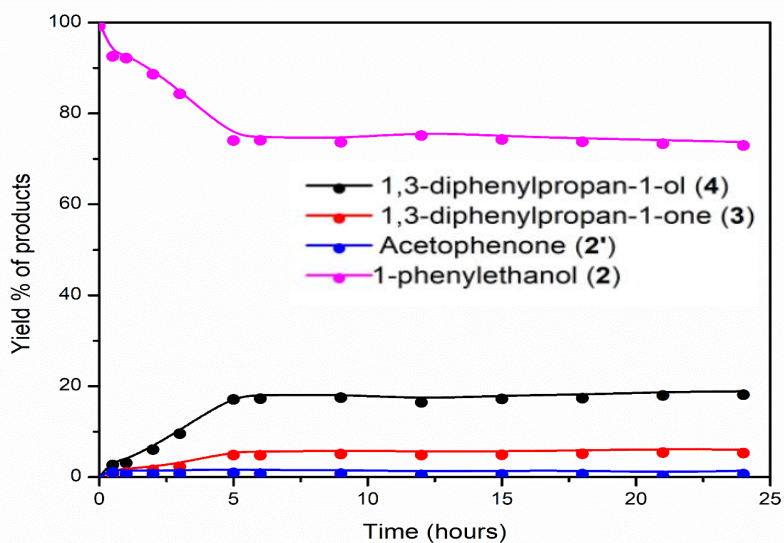

**Figure S76:** Time-profile of the  $\beta$ -alkylation of Benzyl Alcohol with 1-Phenyl Ethanol. Reaction condition: 5 mmol of **1**, 5 mmol of **2**, 0.01 mol%  $\text{CoCl}_2$ , 1 mol%  $\text{NaO}^t\text{Bu}$  at 140 °C

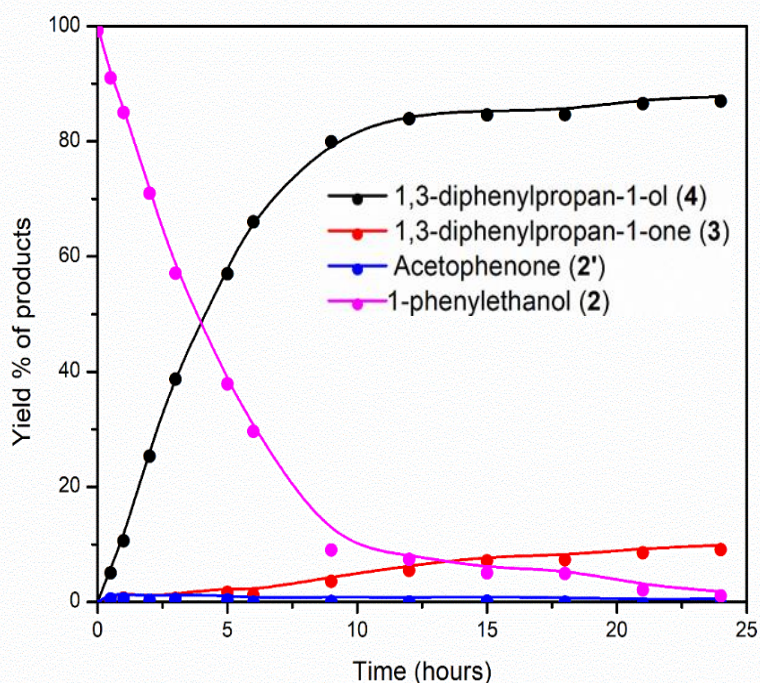

**Figure S77:** Time-profile of the  $\beta$ -alkylation of Benzyl Alcohol with 1-Phenyl Ethanol. Reaction condition: 5 mmol of **1**, 5 mmol of **2**, 0.01 mol%  $\text{CoCl}_2$ , 5 mol%  $\text{NaO}^t\text{Bu}$  at 140 °C

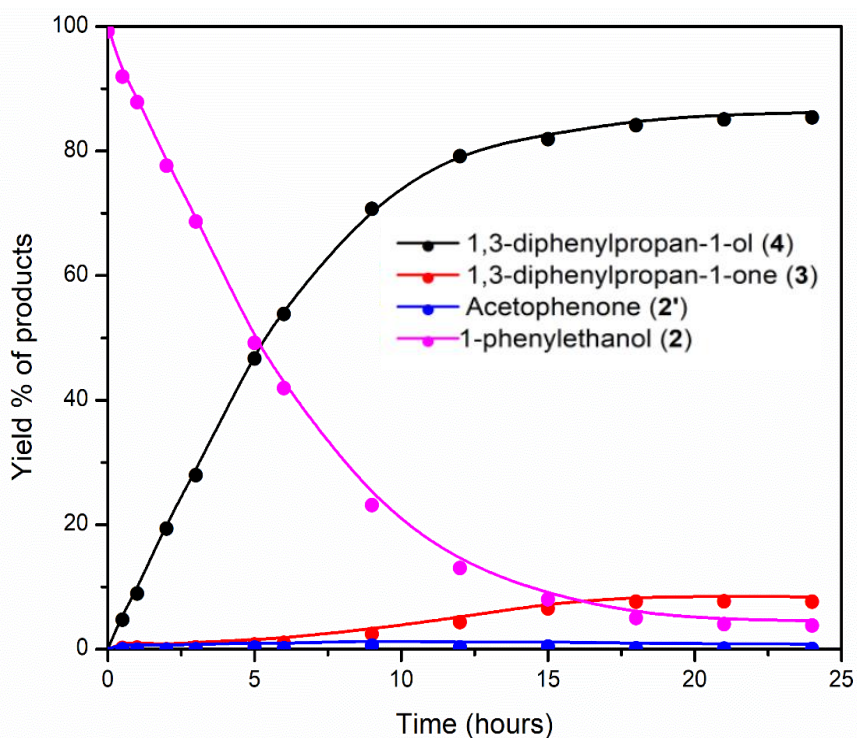

**Figure S78:** Time-profile of the  $\beta$ -alkylation of Benzyl Alcohol with 1-Phenyl Ethanol. Reaction condition: 5 mmol of **1**, 5 mmol of **2**, 0.01 mol%  $\text{CoCl}_2$ , 10 mol%  $\text{NaO}^t\text{Bu}$  at 140 °C

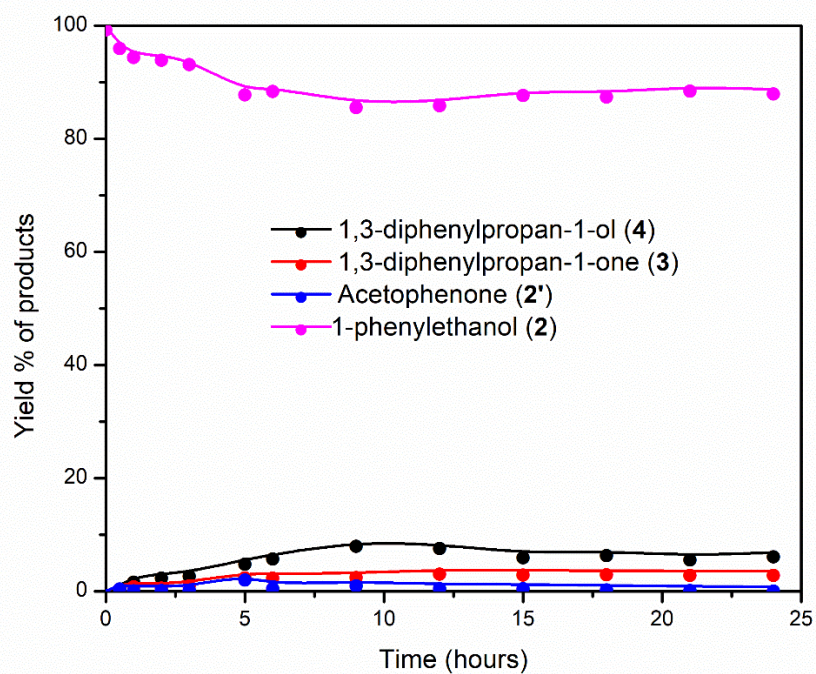

**Figure S78a:** Time-profile of the  $\beta$ -alkylation of Benzyl Alcohol with 1-Phenyl Ethanol. Reaction condition: 5 mmol of **1**, 5 mmol of **2**, 0.01 mol%  $\text{CoCl}_2$ , 0.5 mol%  $\text{NaO}^t\text{Bu}$  at 140 °C



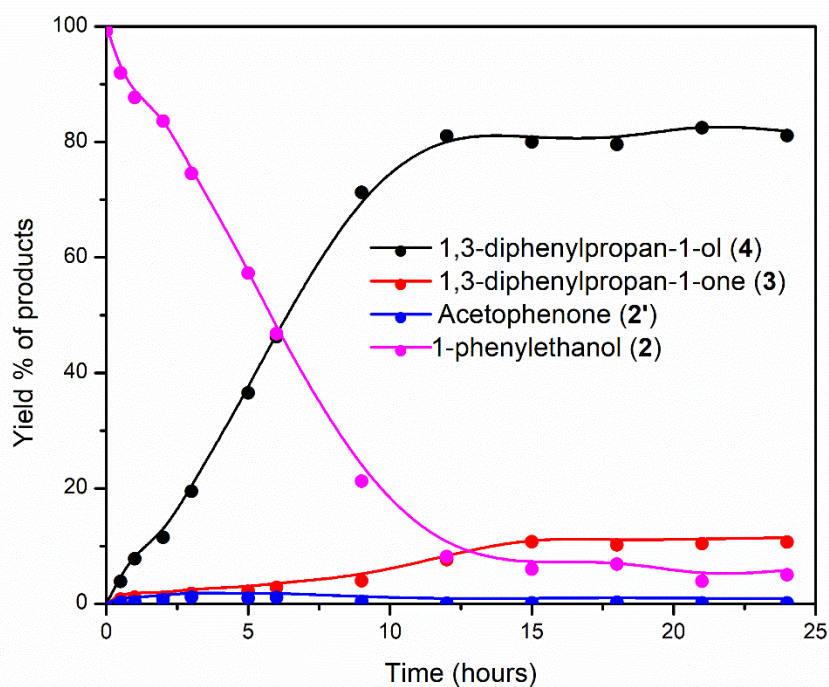

**Figure S78b:** Time-profile of the  $\beta$ -alkylation of Benzyl Alcohol with 1-Phenyl Ethanol. Reaction condition: 5 mmol of **1**, 5 mmol of **2**, 0.01 mol%  $\text{CoCl}_2$ , 3.75 mol%  $\text{NaO}^t\text{Bu}$  at 140 °C

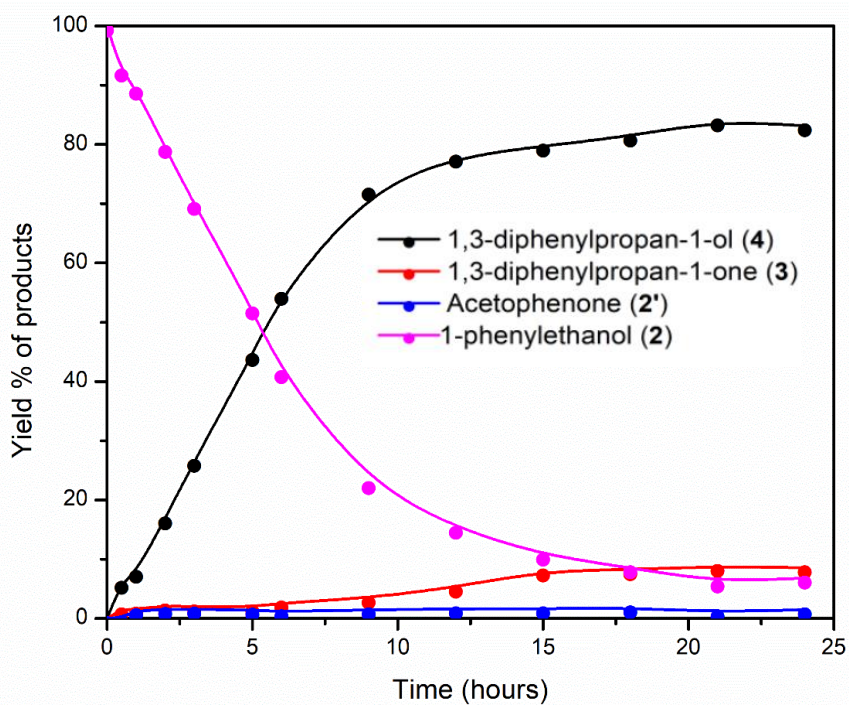

**Figure S79:** Time-profile of the  $\beta$ -alkylation of Benzyl Alcohol with 1-Phenyl Ethanol. Reaction condition: 3.75 mmol of **1**, 5 mmol of **2**, 129  $\mu\text{L}$  mesitylene, 0.01 mol%  $\text{CoCl}_2$ , 2.5 mol%  $\text{NaO}^t\text{Bu}$  at 140 °C

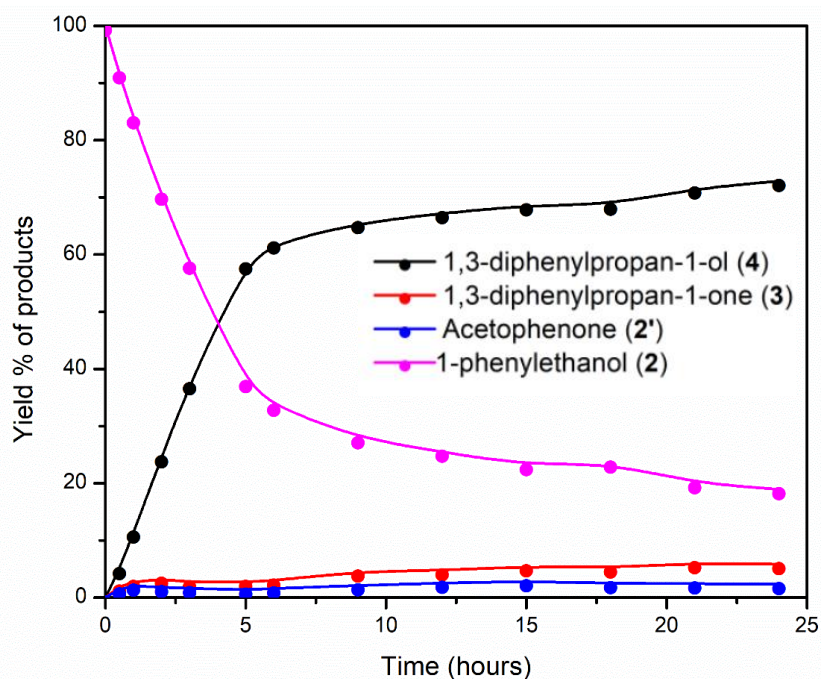

**Figure S80:** Time-profile of the  $\beta$ -alkylation of Benzyl Alcohol with 1-Phenyl Ethanol. Reaction condition: 2.5 mmol of **1**, 5 mmol of **2**, 257  $\mu$ L mesitylene, 0.01 mol%  $\text{CoCl}_2$ , 2.5 mol%  $\text{NaO}^t\text{Bu}$  at 140  $^\circ\text{C}$

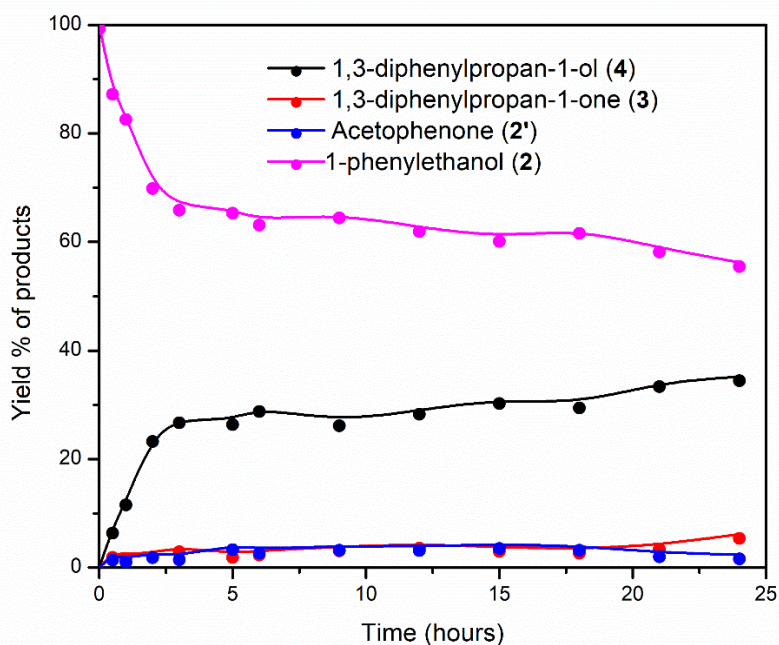

**Figure S80a:** Time-profile of the  $\beta$ -alkylation of Benzyl Alcohol with 1-Phenyl Ethanol. Reaction condition: 0.625 mmol of **1**, 5 mmol of **2**, 450.6  $\mu$ L mesitylene, 0.01 mol%  $\text{CoCl}_2$ , 2.5 mol%  $\text{NaO}^t\text{Bu}$  at 140  $^\circ\text{C}$



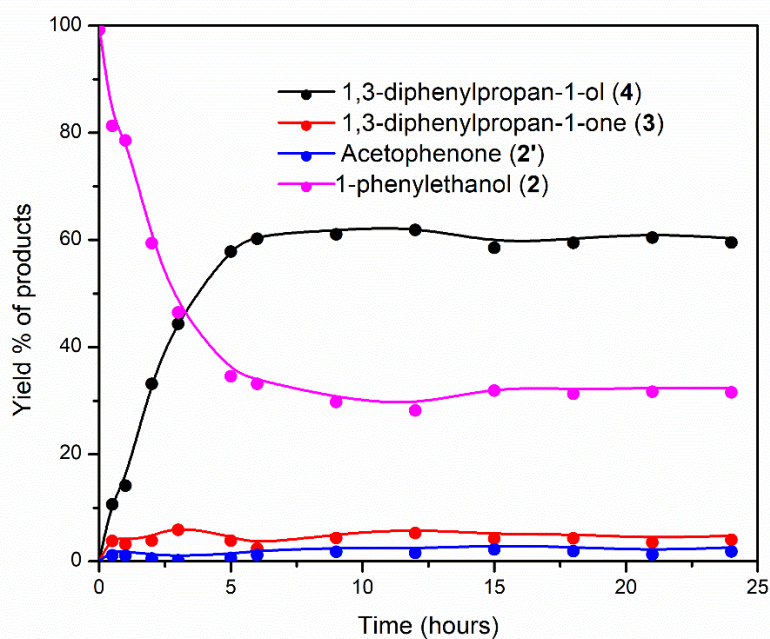

**Figure S80b:** Time-profile of the  $\beta$ -alkylation of Benzyl Alcohol with 1-Phenyl Ethanol. Reaction condition: 1.25 mmol of **1**, 5 mmol of **2**, 386  $\mu$ L mesitylene, 0.01 mol%  $\text{CoCl}_2$ , 2.5 mol%  $\text{NaO}^t\text{Bu}$  at 140  $^\circ\text{C}$

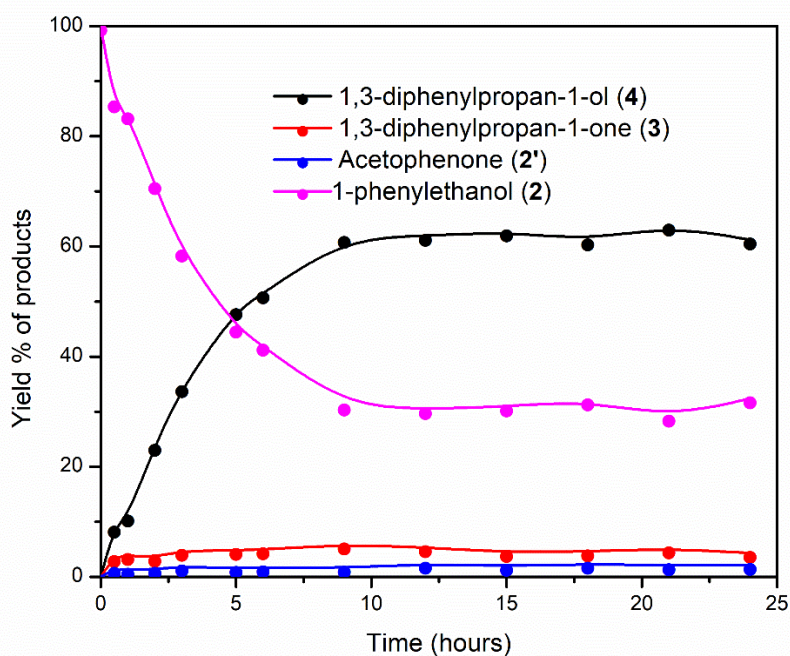

**Figure S80c:** Time-profile of the  $\beta$ -alkylation of Benzyl Alcohol with 1-Phenyl Ethanol. Reaction condition: 1.875 mmol of **1**, 5 mmol of **2**, 322  $\mu$ L mesitylene, 0.01 mol%  $\text{CoCl}_2$ , 2.5 mol%  $\text{NaO}^t\text{Bu}$  at 140  $^\circ\text{C}$

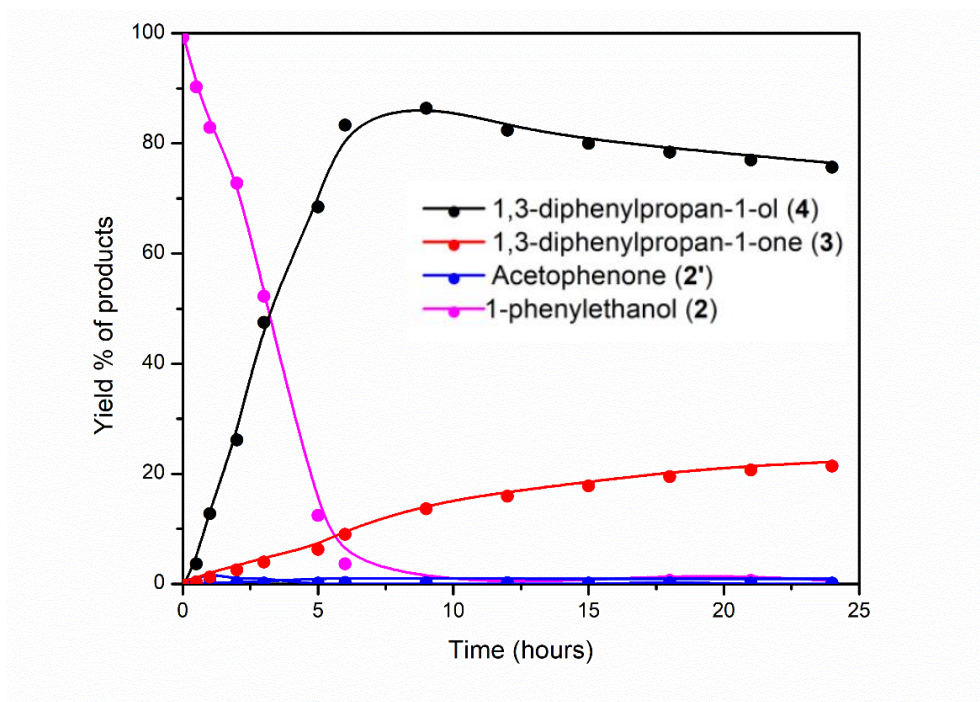

**Figure S81:** Time-profile of the  $\beta$ -alkylation of Benzyl Alcohol with 1-Phenyl Ethanol. Reaction condition: 5 mmol of **1**, 2.5 mmol of **2**, 302  $\mu$ L mesitylene, 0.01 mol%  $\text{CoCl}_2$ , 2.5 mol%  $\text{NaO}^t\text{Bu}$  at 140  $^\circ\text{C}$

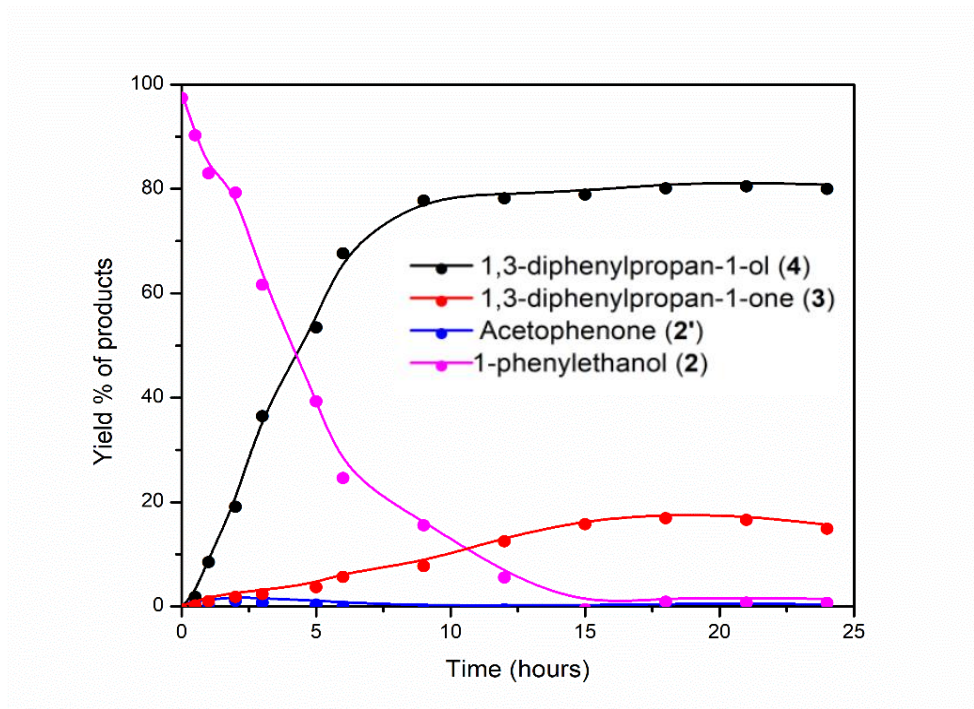

**Figure S82:** Time-profile of the  $\beta$ -alkylation of Benzyl Alcohol with 1-Phenyl Ethanol. Reaction condition: 5 mmol of **1**, 3.75 mmol of **2**, 151  $\mu$ L mesitylene, 0.01 mol%  $\text{CoCl}_2$ , 2.5 mol%  $\text{NaO}^t\text{Bu}$  at 140  $^\circ\text{C}$



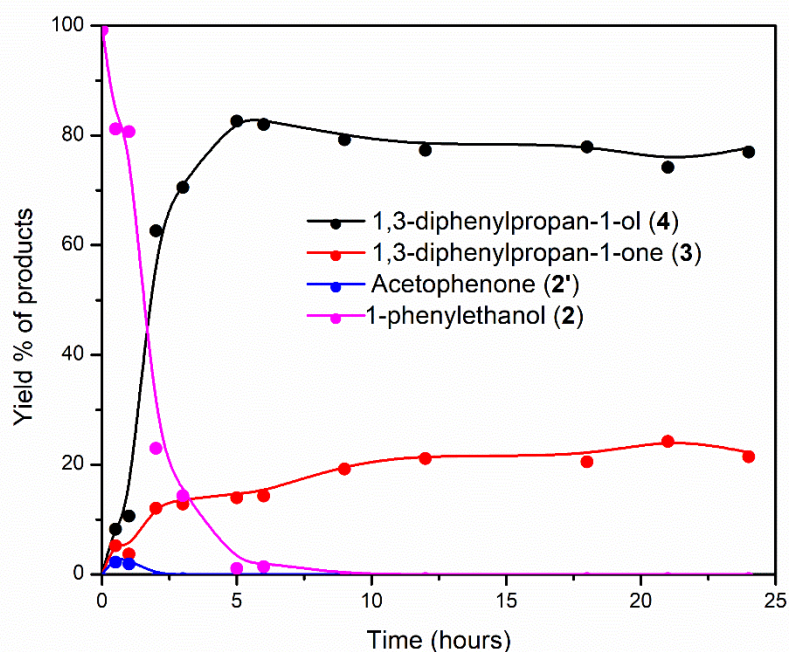

**Figure S82a:** Time-profile of the  $\beta$ -alkylation of Benzyl Alcohol with 1-Phenyl Ethanol. Reaction condition: 5 mmol of **1**, 0.625 mmol of **2**, 529  $\mu$ L mesitylene, 0.01 mol%  $\text{CoCl}_2$ , 2.5 mol%  $\text{NaO}^t\text{Bu}$  at 140  $^\circ\text{C}$

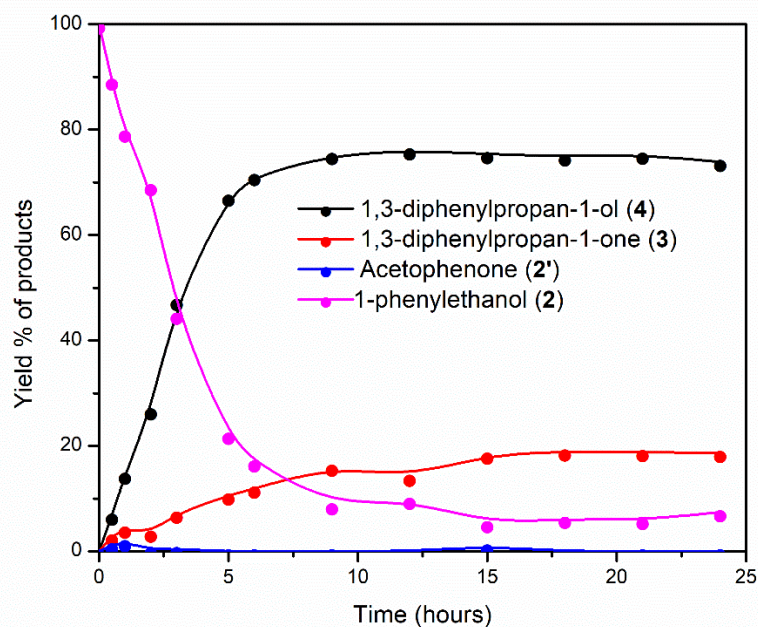

**Figure S82b:** Time-profile of the  $\beta$ -alkylation of Benzyl Alcohol with 1-Phenyl Ethanol. Reaction condition: 5 mmol of **1**, 1.25 mmol of **2**, 453  $\mu$ L mesitylene, 0.01 mol%  $\text{CoCl}_2$ , 2.5 mol%  $\text{NaO}^t\text{Bu}$  at 140  $^\circ\text{C}$

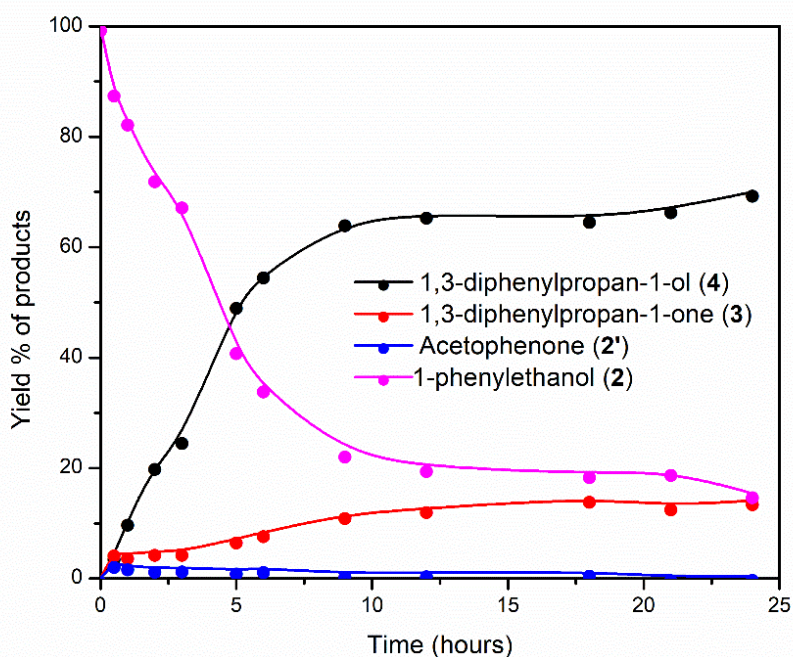

**Figure S82c:** Time-profile of the  $\beta$ -alkylation of Benzyl Alcohol with 1-Phenyl Ethanol. Reaction condition: 5 mmol of **1**, 1.875 mmol of **2**, 377  $\mu$ L mesitylene, 0.01 mol%  $\text{CoCl}_2$ , 2.5 mol%  $\text{NaO}^t\text{Bu}$  at 140  $^\circ\text{C}$

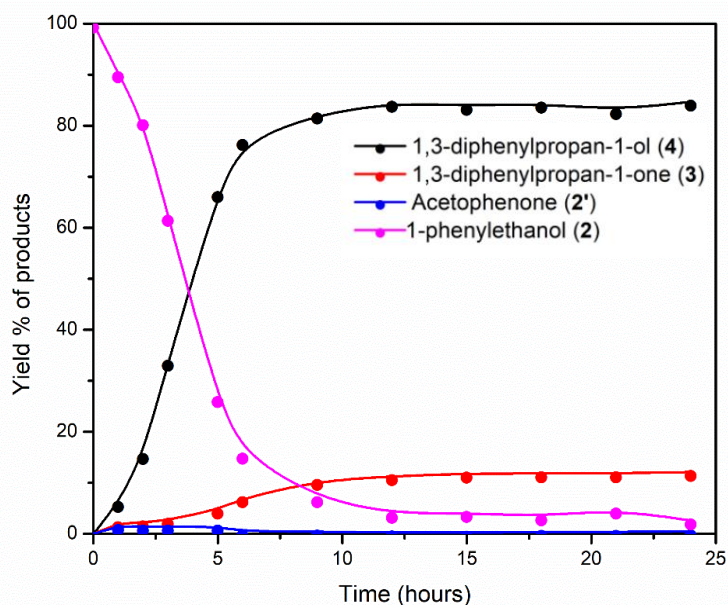

**Figure S83:** Time-profile of the  $\beta$ -alkylation of Benzyl Alcohol with 1-Phenyl Ethanol. Reaction condition: after hot filtration with 5 mmol of **1**, 5 mmol of **2**, 0.01 mol%  $\text{CoCl}_2$ , 2.5 mol%  $\text{NaO}^t\text{Bu}$  at 140  $^\circ\text{C}$



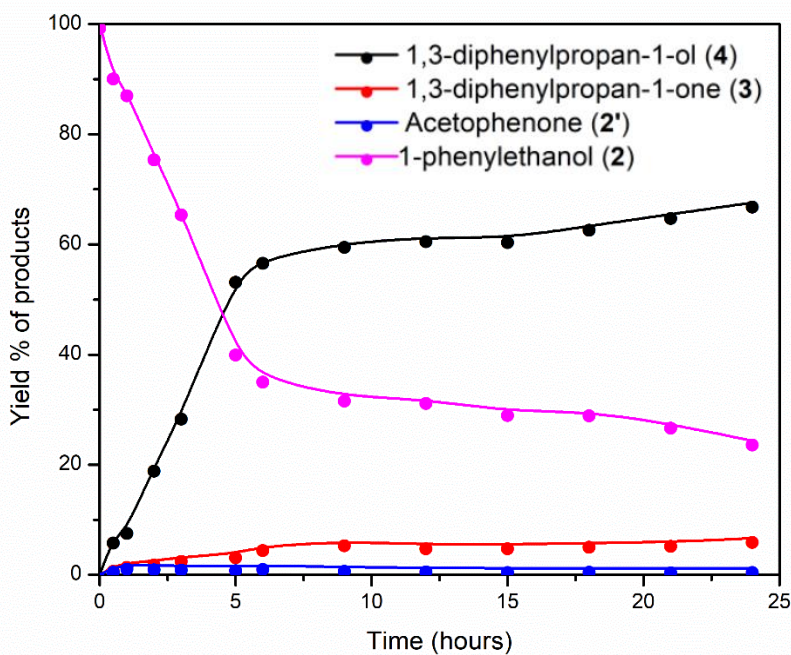

**Figure S84:** Time-profile of the  $\beta$ -alkylation of Benzyl Alcohol with 1-Phenyl Ethanol. Reaction condition: 3 hours interval after 3 hours with 5 mmol of **1**, 5 mmol of **2**, 0.01 mol%  $\text{CoCl}_2$ , 2.5 mol%  $\text{NaO}^t\text{Bu}$  at 140 °C

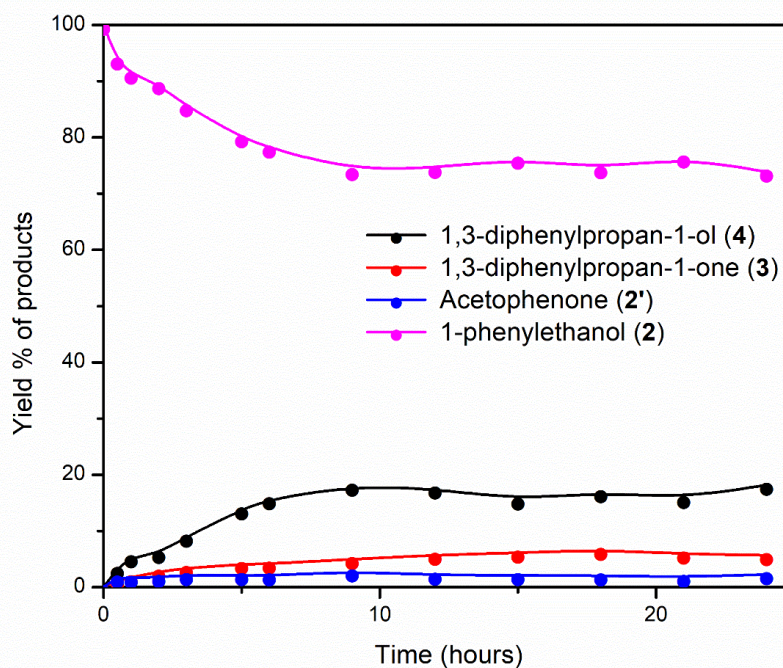

**Figure S85:** Time-profile of the  $\beta$ -alkylation of Benzyl Alcohol with 1-Phenyl Ethanol (average plot). Reaction condition: 5 mmol of **1**, 5 mmol of **2**, 1 mol%  $\text{CoCl}_2$ , 2.5 mol%  $\text{NaO}^t\text{Bu}$  at 140 °C

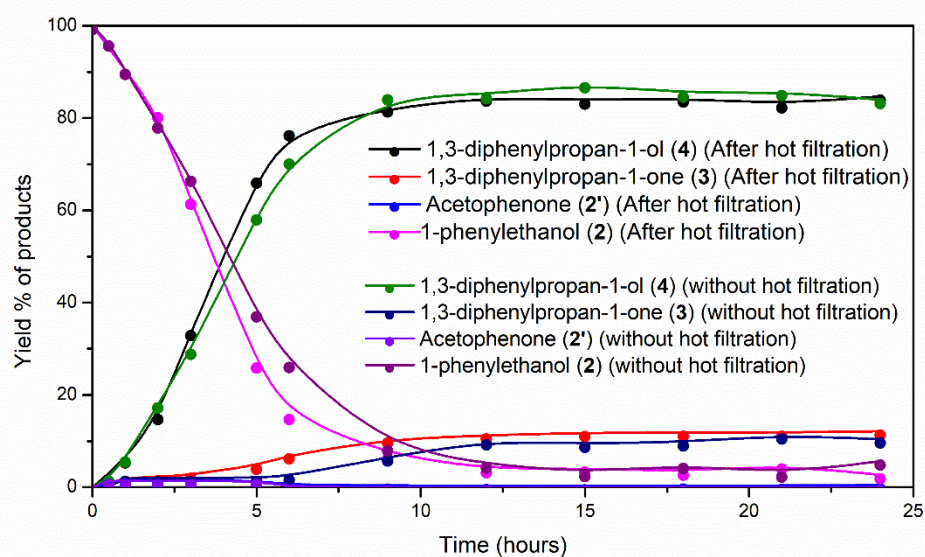

**Figure S86:** Time-profile of the  $\beta$ -alkylation of Benzyl Alcohol with 1-Phenyl Ethanol. Reaction condition: after and before hot filtration with 5 mmol of **1**, 5 mmol of **2**, 0.01 mol%  $\text{CoCl}_2$ , 2.5 mol%  $\text{NaO}^t\text{Bu}$  at 140 °C

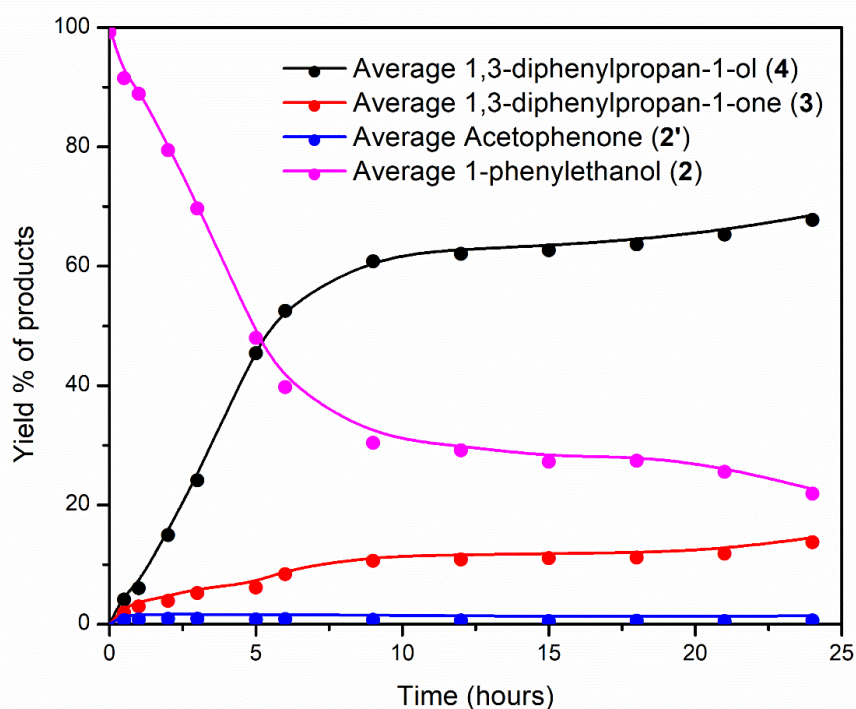

**Figure S87:** Time-profile of the  $\beta$ -alkylation of Benzyl Alcohol with 1-Phenyl Ethanol. Reaction condition: average plot of 3h interval after 3h with 5 mmol of **1**, 5 mmol of **2**, 0.01 mol%  $\text{CoCl}_2$ , 2.5 mol%  $\text{NaO}^t\text{Bu}$  at 140 °C



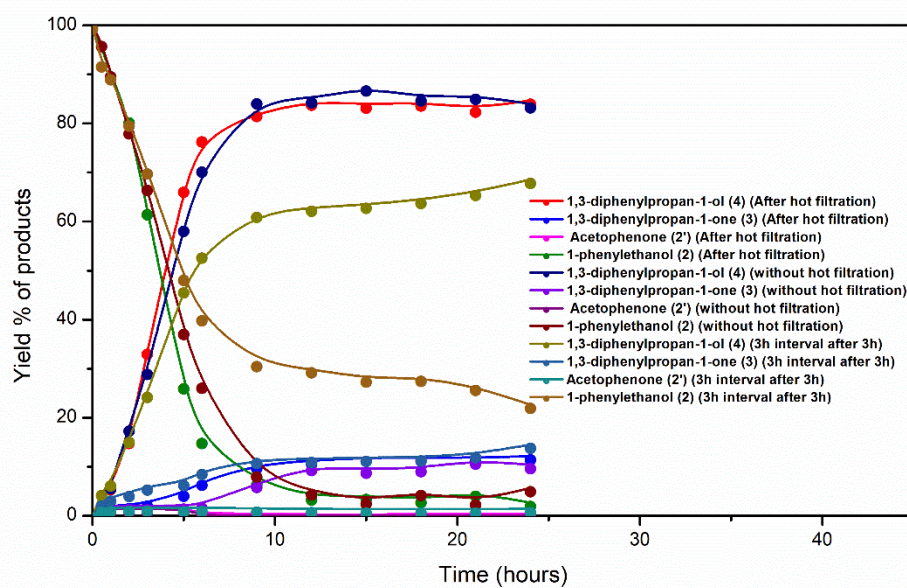

**Figure S88:** Time-profile of the  $\beta$ -alkylation of Benzyl Alcohol with 1-Phenyl Ethanol. Reaction condition: effect of hot filtration with 5 mmol of **1**, 5 mmol of **2**, 0.01 mol%  $\text{CoCl}_2$ , 2.5 mol%  $\text{NaO}^t\text{Bu}$  at 140 °C

## 8. FESEM Analysis

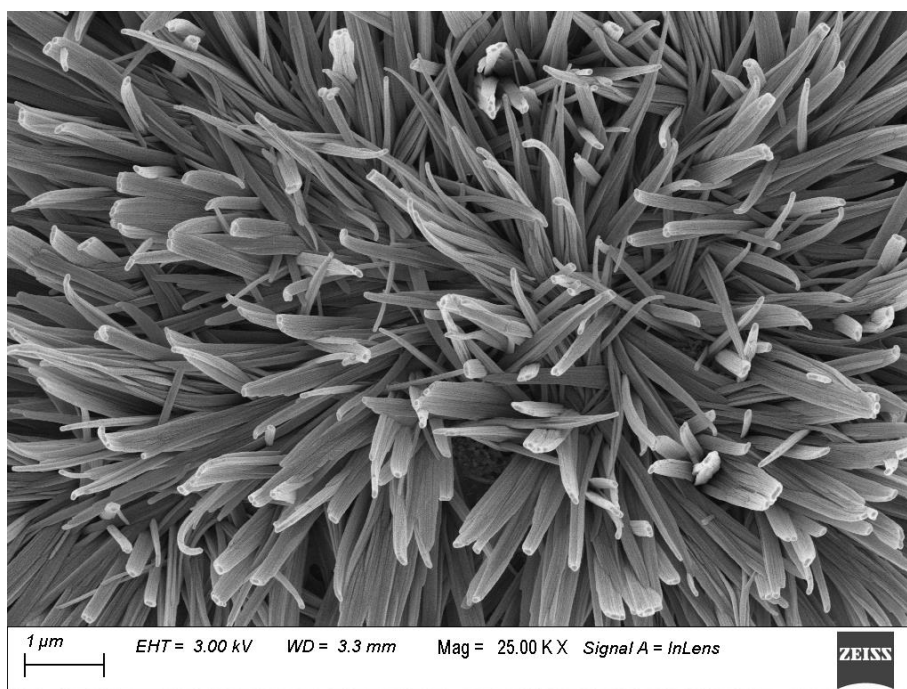

**Figure S89:** FESEM image of the black particles formed in the  $\beta$ -alkylation reaction (entry 7, Table 1).

## 9. TEM Analysis

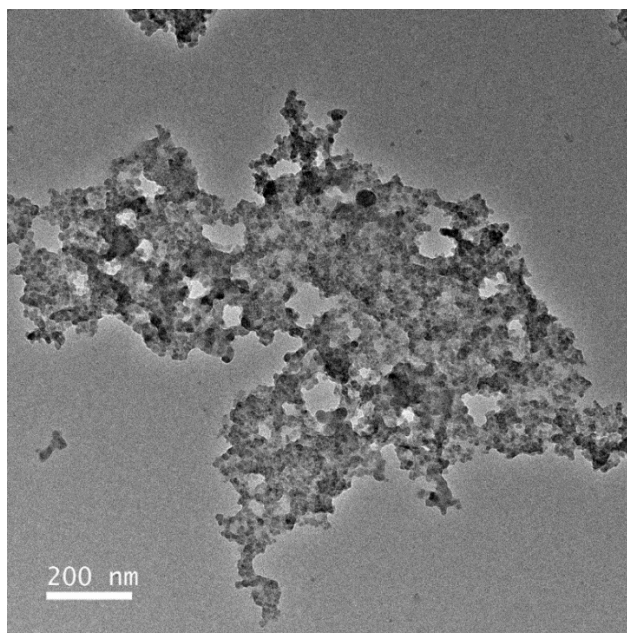

**Figure S90:** TEM image of the black particles formed in the  $\beta$ -alkylation reaction (entry 7, Table 1).

## 10. Evidence for the formation of Black particles

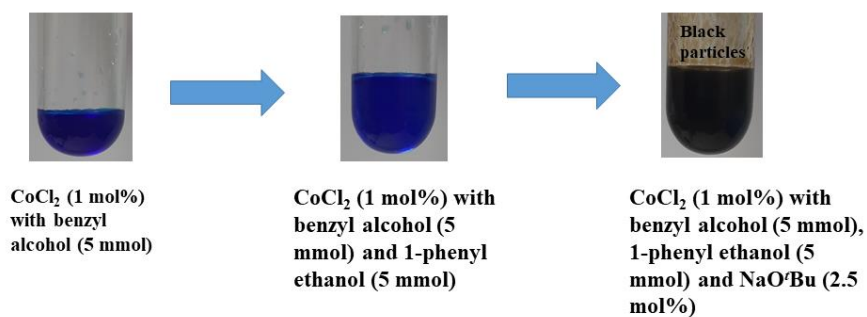

**Figure S91:** Visual appearance of the reaction mixture in the  $\beta$ -alkylation of Benzyl Alcohol with 1-Phenyl Ethanol in the presence of 1 mol% CoCl<sub>2</sub> and 2.5 mol% of NaO<sup>t</sup>Bu within 5 minutes (Entry 1, Table 1)



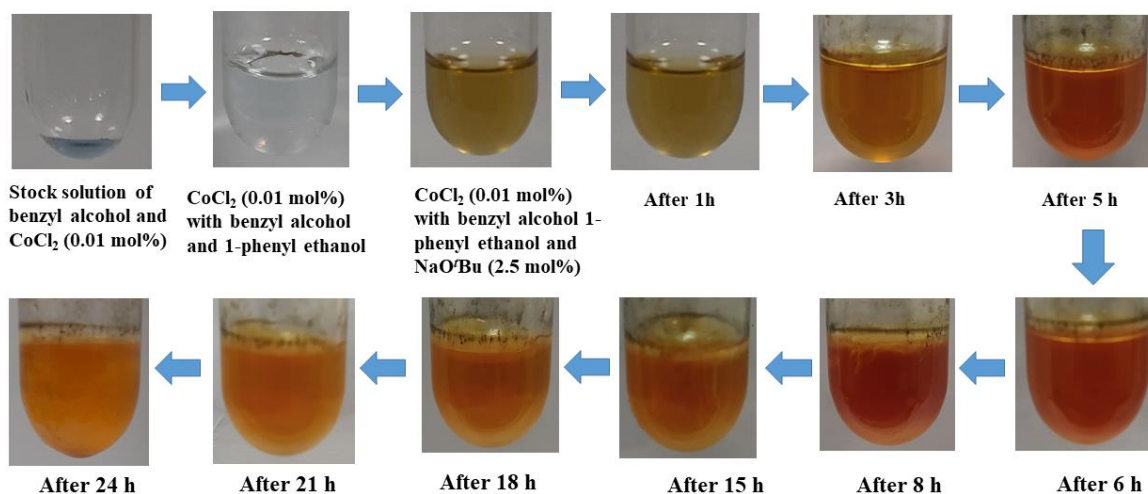

**Figure S92:** Visual appearance of the reaction mixture in the  $\beta$ -alkylation of Benzyl Alcohol with 1-Phenyl Ethanol in the presence of 0.01 mol% CoCl<sub>2</sub> and 2.5 mol% of NaO<sup>t</sup>Bu at 140 °C (Entry 7, Table 1)

## 11. References

- 1 (a) S. W. Chaikin and W. G. Brown, *J. Am. Chem. Soc.*, 1949, **71**, 122-125; (b) H. Günther, *NMR Spectroscopy: Basic Principles, Concepts and Applications in Chemistry*. Wiley: 2013.
- 2 T. W. Ng, G. Liao, K. K. Lau, H. J. Pan and Y. Zhao, *Angew. Chem. Int. Ed.*, 2020, **59**, 11384–11389.
- 3 G. Zhang, J. Wu, H. Zeng, S. Zhang, Z. Yin and S. Zheng, *Org. Lett.*, 2017, **19**, 1080-1083.
- 4 K. Chakrabarti, B. Paul, M. Maji, B. C. Roy, S. Shee and S. Kundu, *Org. Biomol. Chem.*, 2016, **14**, 10988-10997.
- 5 F. Freitag, T. Irrgang and R. Kempe, *Chem. Eur. J.*, 2017, **23**, 12110-12113.
- 6 T. Liu, L. Wang, K. Wu and Z. Yu, *ACS Catal.*, 2018, **8**, 7201-7207.
- 7 V. K. Singh, S. Donthireddy, P. M. Illam and A. Rit, *Dalton Trans.*, 2020, **49**, 11958-11970.
- 8 M.-J. Zhang, H.-X. Li, D. J. Young, H.-Y. Li and J.-P. Lang, *Org. Biomol. Chem.*, 2019, **17**, 3567-3574.
- 9 M. Schlagbauer, F. Kallmeier, T. Irrgang and R. Kempe, *Angew. Chem. Int. Ed.*, 2020, **59**, 1485-1490.
- 10 X. Zhang, C. Yang, H. Gao, L. Wang, L. Guo and W. Xia, *Org. Lett.*, 2021, **23**, 3472-3476.
- 11 K. S. Gomes, T. A. da Costa-Silva, I. H. Oliveira, A. M. Aguilar, D. Oliveira-Silva, M. Uemi, W. A. Silva, L. R. Melo, C. K. Z. Andrade, A. G. Tempone, J. L. Baldim and J. H. G. Lago, *Bioorg. Med. Chem. Lett.*, 2019, **29**, 1459-1462.

12 O. El-Sepelgy, E. Matador, A. Brzowska and M. Rueping, *Chem. Sus. Chem.*, 2019, **12**, 3099-3102.

13 V. Arora, H. Narjinari and A. Kumar, *Organometallics*, 2021, **40**, 2870–2880.
